# Supplementary material for: Human intracranial recordings link suppressed transients rather than 'filling-in' to perceptual continuity across blinks
Source: eLife journal article supplement (doi:10.7554/elife.17243), 2016-09-29
Supplement: supp [file elife-17243-supp-v1.zip]

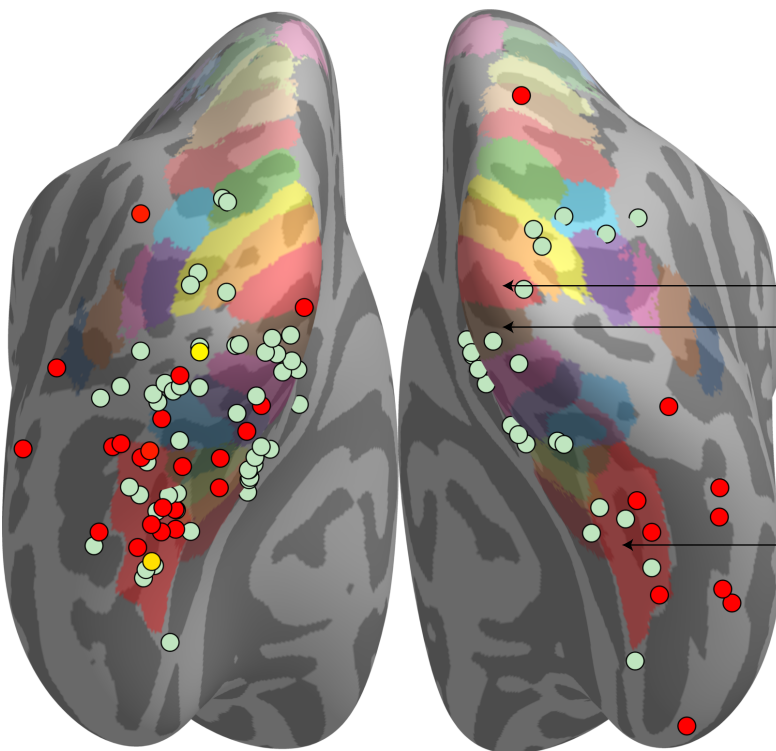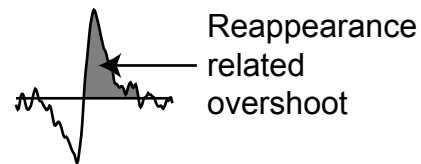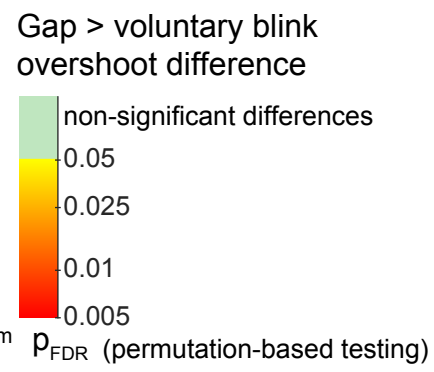

Occurrence of significant differences across ROIs

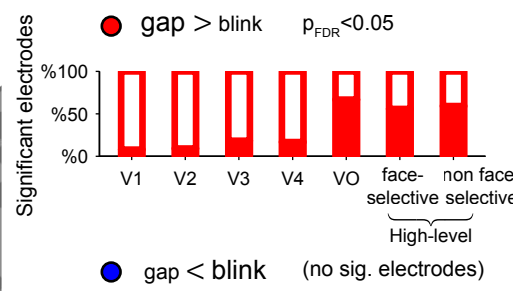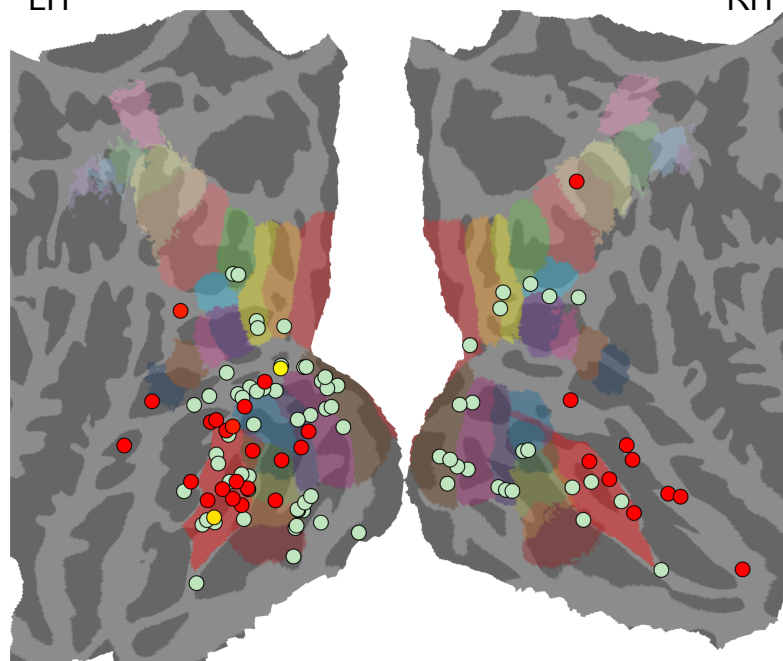

Visual regions

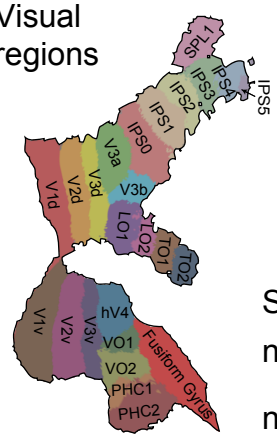

Sample Size

$n_{\text{electrodes}} = 108$

$n_{\text{patients}} = 10$

anterior ← posterior → anterior
