# Supplementary material for: Human intracranial recordings link suppressed transients rather than 'filling-in' to perceptual continuity across blinks
Source: eLife journal article supplement (doi:10.7554/elife.17243), 2016-09-29
Supplement: supp [file elife-17243-supp-v1.zip]

Archive with 15 entries (15 files):
- elife_poa_e17243_Figure_5_figure_supplement_1.pdf
- elife_poa_e17243_Figure_7_source_data_1.xls
- elife_poa_e17243_Figure_7_figure_supplement_2.pdf
- elife_poa_e17243_Figure_7_figure_supplement_1.pdf
- elife_poa_e17243_Figure_1_figure_supplement_1.pdf
- elife_poa_e17243_Figure_2_source_data_1.csv
- elife_poa_e17243_Figure_7_figure_supplement_3.pdf
- elife_poa_e17243_Figure_4_figure_supplement_1.pdf
- elife_poa_e17243_Figure_5_figure_supplement_2.pdf
- elife_poa_e17243_Figure_6_figure_supplement_1_source_data_1.csv
- elife_poa_e17243_Figure_6_source_data_1.csv
- elife_poa_e17243_Figure_3_figure_supplement_1.pdf
- elife_poa_e17243_Video_2.avi
- elife_poa_e17243_Video_1.avi
- elife_poa_e17243_Figure_6_figure_supplement_1.pdf
