# Supplementary material for: Human intracranial recordings link suppressed transients rather than 'filling-in' to perceptual continuity across blinks
Source: eLife journal article supplement (doi:10.7554/elife.17243), 2016-09-29

— Face trials  
— Non-face trials

High-level  
visual cortex

disappearance  
locked

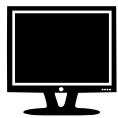

Early gaps

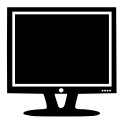

Middle gaps

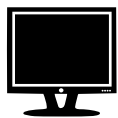

Late gaps

High-frequency broadband power (% signal change)

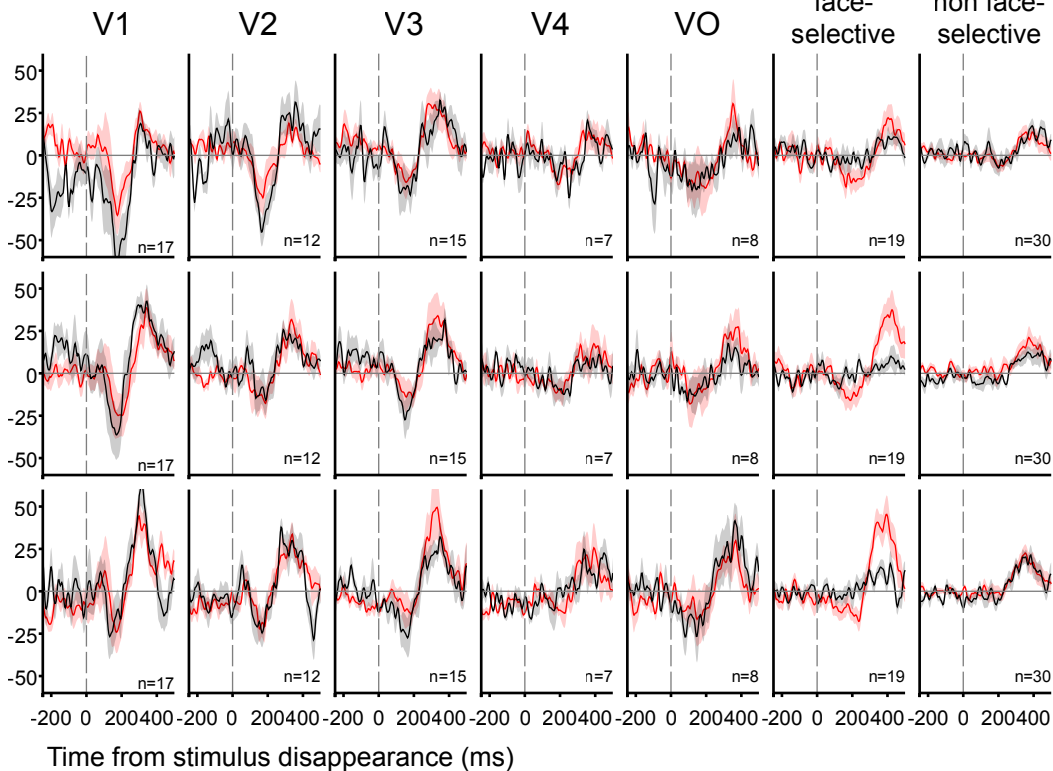

Supplement: supp [file elife-17243-supp-v1.zip]
