# Supplementary material for: Human intracranial recordings link suppressed transients rather than 'filling-in' to perceptual continuity across blinks
Source: eLife journal article supplement (doi:10.7554/elife.17243), 2016-09-29
Supplement: supp [file elife-17243-supp-v1.zip › elife_poa_e17243_Figure_2_source_data_1.csv]

patient_number	electrode_name	nearest_SUMA_std_141_node_index	nearest_SUMA_std_141_node_hemisphere	nearest_SUMA_std_141_node_MNI_X	nearest_SUMA_std_141_node_MNI_Y	nearest_SUMA_std_141_node_MNI_Z	activation_vs_baseline_corrected_pValue	optimal_category	optimal_category_vs_baseline_glassD	is_selected_for_further_analysis	face_selectivity_uncorrected_pValue
20	Grid 1	63857	rh	58.574592590332	25.2842674255371	20.3118724822998	1	house	0.210306252163871	0	NaN
20	Grid 10	184626	rh	57.6763381958008	9.23768424987793	23.4104232788086	1	house	0.218060532317735	0	NaN
20	Grid 11	187659	rh	66.192756652832	9.46282768249512	10.959189414978	1	texture	0.33247043597316	0	NaN
20	Grid 12	188194	rh	68.0765228271484	-0.803279638290405	12.9184598922729	1	texture	0.229198741858444	0	NaN
20	Grid 13	197403	rh	62.4330978393555	-28.7163200378418	13.0789918899536	1	house	0.247504241809882	0	NaN
20	Grid 15	195979	rh	63.4715461730957	-46.4466705322266	13.9805660247803	1	face	0.153035652215885	0	0.168482349810337
20	Grid 16	194641	rh	53.4813537597656	-44.4725799560547	19.2866325378418	1	face	0.167793458078013	0	0.168482349810337
20	Grid 19	70406	rh	43.0056304931641	14.2873601913452	53.7183074951172	1	tool	0.250217170019415	0	NaN
20	Grid 2	65328	rh	56.3059158325195	21.1908302307129	30.1765441894531	1	tool	0.341812369549298	0	NaN
20	Grid 20	72892	rh	47.7778625488281	-9.18660068511963	47.7027244567871	0.313522417802368	tool	0.702787247576143	0	NaN
20	Grid 21	74789	rh	49.596061706543	-13.1895618438721	46.4700241088867	1	house	-0.00865743269754575	0	NaN
20	Grid 22	102169	rh	46.3000106811523	-21.510274887085	57.2639961242676	1	house	0.117324297825608	0	NaN
20	Grid 23	103124	rh	47.0378456115723	-33.4155464172363	62.1528244018555	1	texture	0.19386702523777	0	NaN
20	Grid 24	100195	rh	50.4135055541992	-36.6749076843262	57.315071105957	1	face	0.0879720800952898	0	0.20185911037757
20	Grid 25	64009	rh	43.9642562866211	27.6188163757324	32.9144515991211	1	texture	0.06227606232997	0	NaN
20	Grid 26	64847	rh	42.3881034851074	18.2037506103516	41.025993347168	1	tool	0.317454466597171	0	NaN
20	Grid 27	65537	rh	43.599925994873	14.6293659210205	40.9918022155762	1	house	0.236098482022284	0	NaN
20	Grid 28	71915	rh	58.3934631347656	-7.79421186447144	47.0523262023926	1	house	0.302815098013017	0	NaN
20	Grid 29	102313	rh	54.951114654541	-15.2166242599487	46.1398239135742	1	texture	0.244657801402622	0	NaN
20	Grid 3	69258	rh	64.8471832275391	9.83917427062988	21.6980819702148	1	house	0.702672226834067	0	NaN
20	Grid 30	102794	rh	55.2968063354492	-18.0476570129395	52.1751556396484	1	texture	0.100234593637505	0	NaN
20	Grid 33	62280	rh	39.3975067138672	42.8648376464844	20.05859375	1	texture	0.143168913111776	0	NaN
20	Grid 34	68879	rh	48.2387313842773	8.28479099273682	34.4361801147461	1	texture	0.585442305885059	0	NaN
20	Grid 35	69101	rh	50.945442199707	3.11361837387085	43.4613609313965	1	face	0.692745191811291	0	0.235815820413959
20	Grid 36	101843	rh	59.047534942627	-1.46946334838867	34.2302627563477	1	house	0.61459322932034	0	NaN
20	Grid 37	102580	rh	62.9350051879883	-10.4686212539673	36.9491844177246	1	face	0.1332419371768	0	0.488514813139575
20	Grid 38	191265	rh	67.2861785888672	-23.8690757751465	28.8451080322266	1	face	-0.071447061478315	0	0.212839269833253
20	Grid 39	191735	rh	64.6153030395508	-27.7275638580322	39.9449729919434	1	house	0.196275966003869	0	NaN
20	Grid 4	188436	rh	69.2688064575195	-6.90180635452271	13.8539867401123	1	tool	0.58244900687611	0	NaN
20	Grid 40	190733	rh	56.2572364807129	-35.6269264221191	47.8114013671875	1	face	-0.0853966847412756	0	0.332278712572602
20	Grid 41	62413	rh	45.3302345275879	37.9818687438965	19.8291664123535	1	texture	-0.0793921855349045	0	NaN
20	Grid 42	69027	rh	54.6621131896973	9.73312950134277	31.2227268218994	1	house	0.228787534349468	0	NaN
20	Grid 43	69399	rh	61.5035438537598	7.51765155792236	33.7185020446777	1	face	0.446874560858941	0	0.467086344349662
20	Grid 44	190933	rh	64.6668090820313	-14.9284963607788	24.1904525756836	1	face	0.526404929416067	0	0.362781608732507
20	Grid 48	191339	rh	47.4443206787109	-45.8418731689453	36.3132209777832	1	tool	0.0433697286402459	0	NaN
20	Grid 49	92251	rh	19.0840702056885	32.5708312988281	49.1346435546875	1	house	-0.177791050075856	0	NaN
20	Grid 50	84433	rh	30.1902694702148	27.6249313354492	51.3743515014648	1	tool	0.197029842208361	0	NaN
20	Grid 51	84446	rh	25.1028785705566	22.0961265563965	57.4146003723145	1	tool	0.188786277217431	0	NaN
20	Grid 52	70160	rh	29.9369068145752	-16.7223987579346	58.9891090393066	1	tool	0.492506876827673	0	NaN
20	Grid 58	62716	rh	34.8896293640137	27.4584617614746	40.4606094360352	1	tool	0.12398886261333	0	NaN
20	Grid 60	72012	rh	41.4970779418945	-1.17468976974487	60.6155319213867	1	tool	0.325490029713772	0	NaN
20	Grid 61	77413	rh	37.473388671875	-17.1747779846191	65.2179870605469	1	face	0.0641857699348139	0	0.382313263642754
20	Grid 62	101248	rh	39.1932983398438	-34.8629570007324	63.0902481079102	1	face	0.179533217043056	0	0.39815990097526
20	Grid 63	102512	rh	39.1325798034668	-43.5124969482422	66.3643646240234	1	house	0.133113236007607	0	NaN
20	Grid 64	104010	rh	30.7505683898926	-42.1550750732422	59.2576637268066	1	face	-0.0138864882118691	0	0.484688062902719
20	Grid 9	63412	rh	63.9932136535645	21.0332145690918	11.7132816314697	1	texture	0.257021636806123	0	NaN
20	Grid8	192504	rh	53.2585754394531	-49.5229301452637	25.0928077697754	1	texture	-0.144579950300432	0	NaN
20	RDH3	15437	rh	39.4362602233887	-14.241473197937	-19.833044052124	1	tool	0.180244673123016	0	NaN
20	RDI 1	46382	rh	43.7469673156738	-12.506796836853	2.3303861618042	1	face	0.629717171273331	0	0.5
20	RDI 2	46633	rh	44.8949737548828	-7.01518726348877	4.62323379516602	1	face	0.625485687347168	0	0.370554737602769
20	RDI 3	43593	rh	47.555549621582	-13.0256004333496	-3.65431070327759	1	face	0.287792966723476	0	0.19385103715642
20	RDS1	47099	rh	38.851490020752	5.43725347518921	3.49152827262878	1	tool	0.450611632700092	0	NaN
20	RFa 1	8730	rh	16.5916137695313	67.9364471435547	-6.17800617218018	1	house	-0.0373976288626357	0	NaN
20	RFa 3	58469	rh	40.5795059204102	57.308406829834	-9.38651466369629	1	tool	0.409604730303021	0	NaN
20	RFa 4	58740	rh	46.562198638916	55.6920166015625	-7.54914379119873	1	tool	0.138721723344428	0	NaN
20	RFa 5	4805	rh	44.2856521606445	41.3331489562988	-10.9675750732422	1	tool	0.224121163097743	0	NaN
20	RFa 6	60036	rh	59.3932800292969	34.1165809631348	1.09643805027008	1	texture	0.225355219390537	0	NaN
20	RFm 1	9119	rh	10.7946672439575	67.1599197387695	-16.5472793579102	1	face	0.197677750493194	0	0.438462801188559
20	RFm 3	54375	rh	18.4364986419678	70.1306228637695	-0.400830209255219	1	tool	0.45344529332257	0	NaN
20	RFm 4	54578	rh	21.1212768554688	62.6177940368652	2.23670339584351	1	texture	0.134143954387993	0	NaN
20	RFm 5	58036	rh	30.130687713623	56.5437850952148	-1.42639362812042	1	tool	0.386461130392297	0	NaN
20	RFm 6	54125	rh	21.5973033905029	60.9620666503906	14.59619140625	1	tool	0.394126050370402	0	NaN
20	RFm 7	54121	rh	19.6425933837891	58.4233703613281	14.6340293884277	1	house	-0.0691404637909421	0	NaN
20	RFm 8	61762	rh	42.7568588256836	42.3542747497559	28.5830669403076	1	texture	0.0851508389557472	0	NaN
20	RFo 3	5768	rh	38.9734954833984	37.8359260559082	-22.4170417785645	1	tool	0.128723416481602	0	NaN
20	RFp 2	97421	rh	8.33303165435791	60.7085075378418	29.8296852111816	1	tool	0.392397151099505	0	NaN
20	RFp 3	96905	rh	8.50963401794434	57.8400192260742	31.7225208282471	1	tool	0.196406293191089	0	NaN
20	RFp 4	95814	rh	4.12054872512817	48.9214973449707	44.4112701416016	1	face	-0.101477905011716	0	0.435195937752817
20	RFp 5	94753	rh	11.6374549865723	43.4023284912109	45.1482315063477	1	texture	-0.130000337597703	0	NaN
20	RFp 6	93344	rh	9.11487007141113	41.6068344116211	54.1434440612793	1	texture	0.130397424886089	0	NaN
20	RFp 7	90306	rh	10.436469078064	23.9768047332764	64.6483383178711	1	house	0.348608413042176	0	NaN
20	RFp 8	86195	rh	13.9802513122559	20.1161651611328	57.7624626159668	1	tool	-0.103754242783812	0	NaN
20	RO 1	161991	rh	47.7749137878418	-81.7262802124023	-15.3635311126709	3.48362762101223e-16	face	4.53295339975457	1	0.274645844953973
20	RO 4	150985	rh	48.6798553466797	-64.8041687011719	-19.3564014434814	8.26874766139126e-07	house	1.93070216410185	0	NaN
20	RO 5	152004	rh	53.9122695922852	-64.6491851806641	-16.8265495300293	0.121511982330379	texture	1.05863608167018	0	NaN
20	RO 8	153207	rh	48.7483978271484	-52.9617805480957	-3.24261975288391	1	face	0.306452855945393	0	0.113529744323153
20	RO 9	153204	rh	47.931812286377	-52.9245414733887	-3.66006994247437	1	house	0.282968754441424	0	NaN
20	RO10	154195	rh	63.8638305664063	-52.6228485107422	-1.40101826190948	1	face	-0.394370366668224	0	0.442535770904807
20	RO3	162591	rh	49.335075378418	-79.7721252441406	-12.5279331207275	1	house	-0.203981289898042	0	NaN
20	RO6	152489	rh	58.3802452087402	-64.9012832641602	-13.1565618515015	1	texture	0.337199311212234	0	NaN
20	RO7	152728	rh	58.0444641113281	-64.3954849243164	-7.59529399871826	1	house	0.0418564012660575	0	NaN
20	RPi 1	161928	rh	19.2331199645996	-101.65877532959	10.4136762619019	3.26323985787262e-17	house	4.23011378031715	1	NaN
20	RPi 3	163256	rh	23.9740428924561	-82.6139297485352	27.2321643829346	0.121511982330379	house	1.33567792501132	0	NaN
20	RPi 4	166759	rh	38.1703262329102	-76.6865844726563	23.7364273071289	1	house	0.558686878565635	0	NaN
20	RPi 5	167884	rh	36.9102172851563	-78.7775115966797	41.4625968933105	1	house	0.382741367488511	0	NaN
20	RPs 1	161811	rh	11.7966060638428	-99.9449310302734	14.9584159851074	4.54510407988407e-12	house	5.03579235554094	1	NaN
20	RPs 2	160425	rh	18.654369354248	-86.31689453125	42.1370162963867	0.0775827973536508	house	1.56991432796496	0	NaN
20	RPs 3	161852	rh	25.8924045562744	-86.4273681640625	34.0068016052246	1	texture	-0.0899347562341221	0	NaN
20	RPs 4	119269	rh	22.1793365478516	-69.2707595825195	50.2915420532227	1.09320863355677e-10	face	2.1935670939514	1	0.39815990097526
20	RPs6	112221	rh	48.8840599060059	-56.4890556335449	40.4328994750977	1	texture	0.154555520053387	0	NaN
20	RTa 1	30746	rh	21.7270603179932	14.4395532608032	-37.4777641296387	1	face	0.265447361162252	0	0.410157704053752
20	RTa 2	30202	rh	26.693790435791	20.5802040100098	-37.4388847351074	1	house	0.903159097883225	0	NaN
20	RTa 4	35053	rh	39.9696464538574	21.0601387023926	-43.9056167602539	1	house	0.508737146522066	0	NaN
20	RTa 5	36882	rh	46.3547210693359	14.3531036376953	-30.0775947570801	1	house	0.203213988639271	0	NaN
20	RTp 1	29536	rh	39.4828186035156	-62.6615524291992	-22.19140625	1.57909943862149e-08	tool	3.24254819512006	1	NaN
20	RTp 2	29252	rh	39.1310653686523	-52.5467414855957	-24.911376953125	1.64540462518941e-16	face	7.68401290341495	1	1.39132944708381e-08
20	RTp 4	34289	rh	50.9020767211914	-51.5521430969238	-27.8957786560059	1	house	-0.424419307029881	0	NaN
20	RTp 6	34050	rh	61.4034729003906	-30.1121292114258	-22.4450340270996	1	tool	0.552154746513625	0	NaN
20	RTp 7	36763	rh	69.9417495727539	-18.0478439331055	-22.9211597442627	1	house	0.0746505189228773	0	NaN
20	RTx 3	30212	rh	33.4175186157227	25.5857334136963	-33.132625579834	1	face	0.233276504675646	0	0.394181334512958
20	RTx 5	40531	rh	51.3412590026855	22.864652633667	-25.2840194702148	1	texture	0.265509860215845	0	NaN
20	RTx1	30753	rh	20.7410297393799	11.3467483520508	-40.5088653564453	1	texture	0.644603044070352	0	NaN
20	RTx2	30203	rh	26.726001739502	20.9785957336426	-36.7284698486328	1	house	0.316374353248058	0	NaN
25	Gd1	58775	rh	38.0777816772461	54.6719703674316	-0.467935293912888	1	tool	0.106531703454471	0	NaN
25	Gd12	61384	rh	41.867546081543	43.5605354309082	19.0200138092041	1	tool	0.655256026082594	0	NaN
25	Gd13	62761	rh	44.9165267944336	37.2821388244629	30.9832897186279	1	house	0.0529243487928831	0	NaN
25	Gd14	64115	rh	48.7417182922363	25.1111869812012	32.7517776489258	1	house	0.050254089376965	0	NaN
25	Gd15	64107	rh	50.534553527832	22.1111240386963	40.0984306335449	1	face	0.244611217641723	0	0.306309832628708
25	Gd16	70953	rh	39.7151718139648	14.2043981552124	56.6251945495605	1	tool	0.0383318655943306	0	NaN
25	Gd17	4374	rh	52.3989181518555	38.8032112121582	-13.3761701583862	1	face	0.156392719580589	0	0.446035057618495
25	Gd18	2656	rh	55.1209983825684	42.9494285583496	-7.09607839584351	1	texture	0.147829255607078	0	NaN
25	Gd19	61950	rh	61.9482917785645	25.4071044921875	0.0453573577105999	1	texture	0.0575746332798869	0	NaN
25	Gd2	58505	rh	41.2852630615234	57.1103019714355	-0.185063347220421	1	house	-0.0452337492989168	0	NaN
25	Gd20	63034	rh	45.8067932128906	27.7869071960449	22.684211730957	1	house	0.293405391306451	0	NaN
25	Gd21	66307	rh	35.2455596923828	18.262845993042	21.403205871582	1	tool	0.0270597074259727	0	NaN
25	Gd22	64870	rh	37.0120658874512	24.7736339569092	28.7808074951172	1	texture	0.67068512310141	0	NaN
25	Gd23	67085	rh	41.1520156860352	6.73368644714355	43.7469177246094	1	house	0.604894440127815	0	NaN
25	Gd24	71361	rh	38.9595909118652	7.36001014709473	56.172679901123	1	tool	0.304734958192032	0	NaN
25	Gd25	3920	rh	43.6178703308105	31.5389194488525	-19.2257022857666	1	texture	0.0315353915999518	0	NaN
25	Gd26	2260	rh	56.7044906616211	22.0339889526367	-8.25476455688477	1	tool	0.204884224038414	0	NaN
25	Gd27	64084	rh	58.2611694335938	22.4998226165771	18.2048473358154	1	texture	0.0389683541680914	0	NaN
25	Gd28	65317	rh	49.9213714599609	20.9739456176758	25.4541149139404	1	tool	0.279940365679578	0	NaN
25	Gd29	66827	rh	39.7976913452148	8.9749870300293	30.8485794067383	0.000358150049394578	tool	1.18077067756043	0	NaN
25	Gd3	57741	rh	44.6829719543457	49.4787521362305	13.1257762908936	1	tool	-0.0501099346938572	0	NaN
25	Gd30	67857	rh	47.3532371520996	2.06860208511353	20.0702133178711	4.42119795220467e-20	face	4.39083844575871	1	0.0175118041203795
25	Gd31	68633	rh	51.6873321533203	5.28728675842285	26.5626945495605	0.0313351999760271	house	0.887259295998455	0	NaN
25	Gd32	73250	rh	49.150707244873	-11.8453588485718	45.8190155029297	1	house	0.0922715159594267	0	NaN
25	Gd34	182755	rh	63.6376762390137	18.115198135376	16.2412166595459	1	texture	0.26927731241091	0	NaN
25	Gd35	183520	rh	62.7403373718262	17.2892036437988	23.8611068725586	1	house	0.292359411227054	0	NaN
25	Gd36	187862	rh	66.1757736206055	9.68157291412354	13.2321481704712	1	house	-0.0225543419114837	0	NaN
25	Gd37	69374	rh	65.488037109375	7.32025527954102	23.455924987793	1	texture	0.466724469521791	0	NaN
25	Gd38	69078	rh	58.4510192871094	9.48368263244629	28.3245429992676	1	face	0.331419249729035	0	0.337135598388378
25	Gd39	71654	rh	55.9106521606445	-3.94315099716187	48.7888870239258	1	texture	0.290284356473607	0	NaN
25	Gd4	57521	rh	33.2434463500977	50.6959419250488	23.2451095581055	1	texture	-0.290528864223621	0	NaN
25	Gd40	72781	rh	53.6340751647949	-13.8131446838379	48.3335838317871	1	tool	-0.020229651462782	0	NaN
25	Gd42	185616	rh	58.168384552002	6.92410278320313	-3.34144639968872	1	texture	0.312993299440089	0	NaN
25	Gd44	187868	rh	65.8142471313477	4.05546092987061	12.0633106231689	3.54733754803605e-05	tool	1.33558606284698	0	NaN
25	Gd45	188953	rh	67.3941345214844	-9.97523498535156	22.2848262786865	0.00940011285315806	house	0.724115001022046	0	NaN
25	Gd46	190026	rh	65.8777618408203	-8.62645244598389	30.0089874267578	0.765000900098347	house	0.661764068005701	0	NaN
25	Gd47	102590	rh	62.3081665039063	-3.89503240585327	35.6268272399902	1	texture	0.187734792011966	0	NaN
25	Gd48	101946	rh	57.2416877746582	-15.2199802398682	40.8867263793945	1	house	0.203507306065862	0	NaN
25	Gd5	62241	rh	30.4568672180176	38.4828948974609	45.1144676208496	1	tool	0.0962000054802091	0	NaN
25	Gd50	41108	rh	65.5473251342773	6.86763668060303	-4.38106679916382	1	tool	0.831362960411711	0	NaN
25	Gd51	41905	rh	58.5091361999512	-1.31320083141327	2.65722894668579	1	texture	0.973606239467204	0	NaN
25	Gd52	187796	rh	56.6858062744141	-13.007303237915	9.56616878509521	1	texture	0.33720014678713	0	NaN
25	Gd53	193033	rh	63.96142578125	-16.1504001617432	12.7684803009033	1	house	0.127105725460382	0	NaN
25	Gd54	189877	rh	60.0624237060547	-9.84415817260742	29.1033515930176	1	face	0.0381919789676419	0	0.422596907618644
25	Gd56	190495	rh	61.7906913757324	-24.8998050689697	45.5372543334961	0.957070027823343	tool	0.757068686003801	0	NaN
25	Gd59	40714	rh	67.5100021362305	-1.26140975952148	1.90656447410584	1	texture	0.615417303544284	0	NaN
25	Gd6	63085	rh	40.5369873046875	26.6052074432373	37.4123840332031	0.0693521257880999	house	0.659856382895366	0	NaN
25	Gd60	41526	rh	65.4640960693359	-6.07070827484131	-0.831362545490265	1	house	0.544764382046655	0	NaN
25	Gd61	193124	rh	65.078971862793	-23.3808898925781	13.5957059860229	1	house	0.770001692619788	0	NaN
25	Gd62	192005	rh	62.8408126831055	-17.7567157745361	19.4897613525391	1	face	-0.0154045673765922	0	0.427784775669929
25	Gd63	190642	rh	62.6405868530273	-24.6479187011719	26.5915794372559	1	face	-0.0268917796747142	0	0.44080726465922
25	Gd64	191009	rh	64.0183334350586	-20.7480163574219	39.3766288757324	1	texture	-0.0209649480540376	0	NaN
25	Gd7	63316	rh	41.0314636230469	24.3425807952881	37.5945434570313	1	house	0.232018822935237	0	NaN
25	Gd8	90276	rh	28.2073078155518	30.2551193237305	50.5847930908203	1	tool	0.542719472223336	0	NaN
25	Gd9	59431	rh	38.7719841003418	44.7334671020508	-6.85227870941162	1	face	-0.0276287144421109	0	0.474931617131153
25	RDA1	44605	rh	36.4841842651367	9.41848182678223	-17.7175960540771	1	tool	0.293921730022694	0	NaN
25	RDA2	44605	rh	36.4841842651367	9.41848182678223	-17.7175960540771	1	texture	0.347941423774319	0	NaN
25	RDA3	44293	rh	37.6082229614258	8.60464286804199	-17.9424457550049	1	texture	0.438131238565688	0	NaN
25	RDA4	41170	rh	32.3236846923828	17.5421028137207	-28.5480804443359	1	house	0.0276311455067404	0	NaN
25	RDA5	41613	rh	54.7671775817871	19.3995132446289	-13.0592861175537	1	house	0.0927646031574852	0	NaN
25	RDH1	40747	rh	25.9609756469727	12.5077323913574	-32.7673683166504	1	face	0.0181992281882131	0	0.49603929094011
25	RDH2	41037	rh	31.8315925598145	18.3360366821289	-28.9598655700684	1	texture	0.47677941715507	0	NaN
25	RDH3	41351	rh	56.2451400756836	20.6177463531494	-14.2006502151489	1	tool	0.255368619930744	0	NaN
25	RDH4	40413	rh	60.3065185546875	11.0974531173706	-13.91064453125	1	texture	0.431492713913675	0	NaN
25	RDI1	45427	rh	43.3109359741211	8.56745719909668	-13.4857110977173	1	tool	0.18735829738123	0	NaN
25	RDI2	45806	rh	45.2663040161133	11.6832695007324	-12.6020469665527	1	face	-0.0334260983295229	0	0.18845372183686
25	RDI3	46170	rh	47.497615814209	13.3721141815186	-7.34295129776001	1	texture	0.222007411779013	0	NaN
25	RDI4	185458	rh	51.6566162109375	0.121365919709206	-0.877304911613464	1	texture	0.206265144918797	0	NaN
25	RDI5	185789	rh	54.7712593078613	0.956747651100159	-0.252247244119644	1	tool	0.348034832992543	0	NaN
25	RFa2	8271	rh	22.9121742248535	64.3807601928711	-11.8048372268677	1	house	0.13102370255639	0	NaN
25	RFa3	55186	rh	26.5048027038574	65.3122863769531	6.83401489257813	1	face	-0.157891683166497	0	0.464400410825044
25	RFa4	57965	rh	36.3968658447266	56.6211242675781	4.91566133499146	1	face	-0.097530004084119	0	0.443419930153935
25	RFa5	57621	rh	41.3710479736328	51.6100387573242	8.80757617950439	1	house	0.0620950203993694	0	NaN
25	RFa6	57741	rh	44.6829719543457	49.4787521362305	13.1257762908936	1	house	0.0147092193361584	0	NaN
25	RFm1	97762	rh	3.58236193656921	62.5702972412109	25.6252746582031	1	texture	-0.0852501232731745	0	NaN
25	RFm2	96822	rh	12.0396537780762	59.8253974914551	33.0683441162109	1	tool	-0.15532097621867	0	NaN
25	RFm3	95795	rh	17.4051647186279	53.3794860839844	35.8845672607422	1	face	0.252772545709821	0	0.0989852736447853
25	RFm4	94307	rh	26.7979850769043	41.4695320129395	36.03466796875	1	texture	0.148406247789363	0	NaN
25	RFm5	61854	rh	29.5899658203125	31.3216342926025	44.0208702087402	1	face	-0.350498914807547	0	0.446035057618495
25	RFm6	62968	rh	39.9571266174316	28.3728046417236	38.6010932922363	1	tool	0.276893075848531	0	NaN
25	RFo1	7342	rh	15.7553272247314	41.5779266357422	-27.1656188964844	1	tool	0.122544700242659	0	NaN
25	RFo2	6457	rh	23.621114730835	35.0673904418945	-24.8288612365723	1	tool	0.0919712340263663	0	NaN
25	RFo3	2844	rh	39.6327018737793	28.5795841217041	-22.7248878479004	1	house	0.59171248712351	0	NaN
25	RFo4	3578	rh	45.9373054504395	27.8367786407471	-18.9629402160645	1	texture	0.527212492074989	0	NaN
25	RFp1	64792	lh	-9.88647937774658	48.3359642028809	40.3537940979004	0.603015764017704	face	0.627710454910878	0	0.369095831937275
25	RFp2	65196	lh	-7.78930759429932	49.9505500793457	43.6436996459961	1	house	0.434476170860359	0	NaN
25	RFp3	93912	rh	5.00572347640991	39.5552597045898	48.0604858398438	1	texture	0.411050504476144	0	NaN
25	RFp4	93684	rh	9.80152130126953	43.5871734619141	51.765007019043	1	texture	0.179636062153292	0	NaN
25	RFp5	92119	rh	22.2556533813477	29.9728736877441	46.5907974243164	1	face	-0.0355105126897679	0	0.31566260513874
25	RFp6	63316	rh	41.0314636230469	24.3425807952881	37.5945434570313	1	texture	0.319322422201447	0	NaN
25	RO1	124249	rh	6.16704034805298	-54.3765907287598	61.9267959594727	1	texture	0.0453470125052835	0	NaN
25	RO2	117149	rh	12.5828399658203	-61.3493728637695	64.421875	1	texture	0.0742019363088743	0	NaN
25	RO3	118512	rh	9.17625617980957	-66.8078384399414	57.2145004272461	1	house	-0.0342191780169604	0	NaN
25	RO4	118185	rh	18.3982048034668	-72.4536209106445	62.0669555664063	1	house	0.401414569248422	0	NaN
25	RO5	107060	rh	35.5964584350586	-41.9084281921387	53.0008125305176	1	face	-0.208802991837068	0	0.407117124364342
25	RO6	107009	rh	30.5273399353027	-37.5149345397949	41.089542388916	1	house	0.253326463252595	0	NaN
25	RO7	190842	rh	47.7672462463379	-46.4740905761719	39.199592590332	1	house	0.312347241780311	0	NaN
25	RTa1	25926	rh	40.0383911132813	-19.5497665405273	-39.2428436279297	1.96354319530737e-08	texture	5.8326629025194	1	NaN
25	RTa2	32360	rh	42.9231872558594	-3.66365385055542	-49.7164726257324	1.04818336656479e-20	house	9.58407184216657	1	NaN
25	RTa3	33672	rh	41.5378074645996	2.23229241371155	-40.5216255187988	0.00152657601321479	face	0.665483442237418	0	0.0219302125989599
25	RTa5	36316	rh	60.0766906738281	2.38914561271667	-31.7272109985352	0.160819101386838	tool	0.770728590568544	0	NaN
25	RTa6	36581	rh	64.0922088623047	-3.18693542480469	-27.5080795288086	1	tool	0.194705546414394	0	NaN
25	RTm1	28244	rh	35.3817558288574	-35.3888130187988	-23.9641342163086	7.91711078527532e-18	house	4.71338793206157	1	NaN
25	RTm2	32775	rh	56.6741065979004	-40.1390953063965	-32.346492767334	3.82750188101989e-19	house	6.53547947383958	1	NaN
25	RTm3	33369	rh	63.6825370788574	-38.3509178161621	-24.8003921508789	8.10514738612513e-09	texture	5.43919305605169	1	NaN
25	RTm4	33827	rh	62.6711921691895	-32.4561653137207	-23.2999267578125	0.205245031623995	tool	1.07809943133874	0	NaN
25	RTm5	37254	rh	71.0371856689453	-29.5679168701172	-13.3111143112183	1	texture	0.323258983302755	0	NaN
25	RTm6	37547	rh	70.1833648681641	-21.0685081481934	-8.40139961242676	1	face	0.195896265411364	0	0.44080726465922
25	RTm7	198494	rh	70.4494857788086	-21.6412467956543	2.11383104324341	1	face	0.0478560115407895	0	0.49075902024405
25	RTm8	198271	rh	62.3700790405273	-27.7313327789307	11.5159912109375	0.000684485966918321	texture	1.22660550778685	0	NaN
25	RTp3	32918	rh	45.2245559692383	-53.8354454040527	-18.4796257019043	1.61636731383387e-15	face	18.2895325466456	1	3.02137935761761e-11
25	RTp4	33287	rh	49.1007080078125	-57.6016616821289	-13.6021976470947	1.15242496002204e-11	tool	4.22469560391631	1	NaN
25	RTp5	156462	rh	62.353385925293	-42.9614868164063	-15.1302433013916	0.92827689727781	face	0.43358605410954	0	0.184900454720411
25	RTp6	154530	rh	50.0133819580078	-51.4749145507813	14.63307762146	1	house	0.415430297546405	0	NaN
25	RTp7	154435	rh	46.5460014343262	-52.7216644287109	13.5622253417969	1	house	0.177330942943945	0	NaN
25	RTp8	155226	rh	46.8515357971191	-49.4393272399902	16.2889099121094	1	house	-0.0540149470737926	0	NaN
25	RTx4	3581	rh	47.697322845459	28.4416484832764	-20.1670036315918	1	tool	0.131429942709812	0	NaN
32	Da1	33990	lh	-35.9867820739746	-14.0284252166748	-23.6769828796387	1	house	0.611430095354083	0	NaN
32	Da2	34204	lh	-37.2702980041504	-12.1158647537231	-22.6553401947021	1	tool	0.500421382220358	0	NaN
32	Da3	27559	lh	-37.861198425293	-22.2741394042969	-31.1650543212891	1	face	0.385929227503885	0	0.331033385117964
32	Da4	27559	lh	-37.861198425293	-22.2741394042969	-31.1650543212891	0.260743026773489	tool	0.6718679697934	0	NaN
32	Da5	24366	lh	-47.7301940917969	-9.43693733215332	-24.9333343505859	0.215904845389421	tool	0.633655953864767	0	NaN
32	Da6	24477	lh	-49.2681617736816	-10.648588180542	-24.4063282012939	0.833387323678417	tool	0.882621966175807	0	NaN
32	Da7	24906	lh	-57.0141754150391	-21.3444175720215	-23.7091770172119	0.167084308241625	texture	1.18716820350585	0	NaN
32	Da8	23945	lh	-66.2229690551758	-14.4245128631592	-23.7562599182129	0.232428360442493	tool	0.998541736287661	0	NaN
32	Di1	131146	lh	-44.1919364929199	-7.55354166030884	4.32686805725098	1	texture	0.607375506106295	0	NaN
32	Di2	131776	lh	-45.1241836547852	-3.75933766365051	10.6274528503418	0.559358935936908	texture	0.979625116567349	0	NaN
32	Di3	131771	lh	-43.8677139282227	-2.02925252914429	10.2910461425781	1	texture	0.869421448604109	0	NaN
32	Di4	96437	lh	-46.2571792602539	1.74223399162292	20.7123432159424	0.156579746518532	texture	0.892759898678975	0	NaN
32	Di5	96263	lh	-44.9377288818359	1.34727668762207	24.514705657959	0.361944100583351	texture	0.92221618677617	0	NaN
32	Di6	95059	lh	-43.4610595703125	0.108487859368324	26.1717052459717	1	tool	0.750035288304786	0	NaN
32	Di7	95030	lh	-44.7475929260254	10.9475736618042	30.8697681427002	1	tool	0.565271724358936	0	NaN
32	Di8	50375	lh	-49.9045715332031	17.4474296569824	43.8815612792969	1	texture	0.521943693769457	0	NaN
32	Ds2	188738	lh	-5.31146240234375	-2.78766536712646	47.6911659240723	0.365616072028087	texture	0.977597248941807	0	NaN
32	Ds3	69546	lh	-2.8703875541687	6.91131734848022	53.2052230834961	0.295197082943552	tool	0.924450291359762	0	NaN
32	Ds4	64109	lh	-21.8194675445557	21.6582832336426	40.8006973266602	0.146685764952651	tool	1.04493122435882	0	NaN
32	Ds5	64000	lh	-22.7650985717773	21.9280166625977	40.5012550354004	0.104128997541978	texture	0.935543675527872	0	NaN
32	Ds6	62354	lh	-25.7840003967285	23.641918182373	40.2075538635254	0.337164056184032	tool	0.959400735335295	0	NaN
32	Ds7	51310	lh	-33.3307723999023	23.3236103057861	43.8487777709961	0.737921896227983	tool	1.15157689162556	0	NaN
32	Ds8	90674	lh	-45.1475677490234	6.56993341445923	50.5565567016602	1	tool	1.1236510003666	0	NaN
32	GRID A1	23675	lh	-38.9009208679199	11.5714168548584	-39.8104515075684	1	texture	0.576831940616277	0	NaN
32	GRID A10	21078	lh	-52.6690940856934	15.0888824462891	-33.932502746582	1	face	0.217032076706013	0	0.431819902924582
32	GRID A11	22132	lh	-51.0278587341309	2.63522601127625	-36.3975410461426	1	texture	0.443293972440616	0	NaN
32	GRID A12	23002	lh	-57.4929008483887	-4.34981441497803	-29.4045906066895	0.198342260308781	face	0.693075719944359	0	0.41348798092678
32	GRID A13	23835	lh	-67.0865020751953	-10.6721801757813	-19.8289470672607	1	face	0.271673790925783	0	0.222442788648528
32	GRID A14	171304	lh	-71.4536437988281	-25.0994682312012	-1.80021512508392	1	tool	0.315030843499836	0	NaN
32	GRID A15	171798	lh	-72.0588912963867	-28.478889465332	-1.3708860874176	1	tool	0.0390840414611152	0	NaN
32	GRID A16	173724	lh	-70.3532791137695	-41.5374221801758	1.14773917198181	1	house	0.360941443740382	0	NaN
32	GRID A18	20674	lh	-55.1195640563965	11.4635467529297	-27.8423233032227	1	tool	0.41048236141158	0	NaN
32	GRID A19	21489	lh	-57.3239288330078	4.4731502532959	-35.6607780456543	1	texture	0.468450047927809	0	NaN
32	GRID A2	23906	lh	-42.9419250488281	6.10560607910156	-36.2996826171875	1	texture	0.686064901119023	0	NaN
32	GRID A23	144348	lh	-66.5658264160156	-22.8598327636719	9.58800411224365	1	texture	0.374105351794385	0	NaN
32	GRID A24	144436	lh	-65.2994689941406	-29.888500213623	13.7378234863281	1	texture	0.27844222697208	0	NaN
32	GRID A25	16365	lh	-42.0464553833008	18.4384174346924	-18.6907577514648	1	texture	0.399724629032447	0	NaN
32	GRID A26	17346	lh	-51.7797317504883	18.4477138519287	-13.1509580612183	1	house	0.644698977417921	0	NaN
32	GRID A27	17986	lh	-55.7587242126465	13.9963188171387	-10.1560211181641	1	texture	0.614439531044412	0	NaN
32	GRID A28	18826	lh	-60.281867980957	3.36917352676392	-3.250648021698	1	texture	0.601798714047462	0	NaN
32	GRID A29	96128	lh	-61.5168304443359	2.2335638999939	5.6259822845459	0.0049624347255331	texture	1.40472652442836	0	NaN
32	GRID A3	24881	lh	-53.3344421386719	-5.69716548919678	-32.109691619873	1	house	-0.0112488090623645	0	NaN
32	GRID A30	94807	lh	-65.6585998535156	-2.05897188186646	13.3934373855591	1	texture	0.481903527303718	0	NaN
32	GRID A31	93855	lh	-67.1390228271484	-8.75549030303955	17.8246841430664	1	tool	0.518540350138093	0	NaN
32	GRID A32	149435	lh	-65.8732147216797	-23.6862716674805	17.7679328918457	1	texture	0.231917136614933	0	NaN
32	GRID A35	50860	lh	-58.4475860595703	25.7670116424561	15.9239063262939	1	tool	0.582693418122075	0	NaN
32	GRID A36	96025	lh	-57.0274543762207	0.477968096733093	12.2813911437988	1	tool	0.399379087391146	0	NaN
32	GRID A37	94782	lh	-54.6167182922363	0.110010623931885	16.4542541503906	1	tool	0.376807057636248	0	NaN
32	GRID A38	93733	lh	-59.4528350830078	-0.343893349170685	18.1775894165039	1	tool	0.475978862346365	0	NaN
32	GRID A39	92199	lh	-64.6561965942383	-6.81269931793213	22.0105934143066	1	face	0.115862844504181	0	0.380391401808327
32	GRID A4	25486	lh	-54.6774444580078	-15.8568830490112	-33.0474700927734	1	house	0.403815610997626	0	NaN
32	GRID A40	129646	lh	-59.9801063537598	-23.9722213745117	22.7737808227539	1	tool	0.652858055831245	0	NaN
32	GRID A41	54712	lh	-54.1900329589844	37.8476943969727	7.37047672271729	1	texture	0.271602449320526	0	NaN
32	GRID A42	50986	lh	-53.2091789245605	34.181812286377	18.674934387207	1	texture	0.295162468558689	0	NaN
32	GRID A43	99116	lh	-55.3739776611328	26.0319232940674	27.7743759155273	1	texture	0.603675726462059	0	NaN
32	GRID A44	98713	lh	-57.7200393676758	12.031304359436	27.2848987579346	1	texture	0.691571673502886	0	NaN
32	GRID A45	94246	lh	-51.1879425048828	2.10499167442322	23.1939258575439	1	house	0.383557039416244	0	NaN
32	GRID A46	92530	lh	-60.5200614929199	5.51540756225586	22.5993461608887	1	tool	0.661018362118434	0	NaN
32	GRID A47	89513	lh	-64.290901184082	-8.60434341430664	31.8774070739746	1	tool	0.26964847063139	0	NaN
32	GRID A48	129547	lh	-55.5636978149414	-24.3395385742188	24.0935974121094	1	tool	0.469501381201238	0	NaN
32	GRID A49	55074	lh	-48.3267707824707	44.8058204650879	19.1496353149414	0.99276843618027	texture	1.04691817915446	0	NaN
32	GRID A5	25777	lh	-59.2437171936035	-18.1629905700684	-26.2011985778809	1	house	0.201599908601359	0	NaN
32	GRID A50	53807	lh	-45.695613861084	35.7616806030273	12.837176322937	1	texture	0.284143649018572	0	NaN
32	GRID A51	52996	lh	-44.8257141113281	34.2787895202637	18.8725605010986	1	tool	1.0904998590119	0	NaN
32	GRID A52	50932	lh	-54.4596328735352	15.3091526031494	35.3122940063477	1	texture	0.412524109476687	0	NaN
32	GRID A53	93905	lh	-39.0279006958008	8.62966728210449	27.6133918762207	1	tool	0.307720319686481	0	NaN
32	GRID A54	91774	lh	-52.9439430236816	9.61129093170166	28.2693328857422	1	texture	0.203279633294986	0	NaN
32	GRID A55	88750	lh	-54.6859130859375	-4.82629919052124	39.8641395568848	1	house	-0.0558966466140339	0	NaN
32	GRID A56	88430	lh	-54.1063690185547	-8.31802368164063	47.5370025634766	1	house	-0.0750712228799268	0	NaN
32	GRID A57	55462	lh	-42.9191665649414	48.8959732055664	23.2704906463623	1	tool	0.148297626870548	0	NaN
32	GRID A58	53689	lh	-46.5231018066406	38.7071990966797	18.5534381866455	1	texture	0.585547120835918	0	NaN
32	GRID A59	52989	lh	-47.8502426147461	41.0638046264648	20.5797805786133	1	face	0.174711324906692	0	0.35189553134116
32	GRID A6	24505	lh	-68.2217330932617	-9.74092388153076	-10.5118751525879	1	tool	0.283145658071013	0	NaN
32	GRID A60	51724	lh	-54.8745307922363	21.6116161346436	35.9320793151855	1	texture	0.183542110282631	0	NaN
32	GRID A61	93308	lh	-46.1806373596191	17.4068374633789	49.1024513244629	1	house	0.224733692507663	0	NaN
32	GRID A62	84444	lh	-48.5756225585938	-0.448957026004791	44.1593475341797	1	texture	0.215865283751517	0	NaN
32	GRID A63	84450	lh	-50.0904083251953	-0.670211613178253	46.1533737182617	1	tool	0.509190794215049	0	NaN
32	GRID A7	170917	lh	-68.8962631225586	-31.8857345581055	-10.1519174575806	1	face	0.102455791202422	0	0.375907241282502
32	GRID A8	173822	lh	-72.0596084594727	-40.7874984741211	-10.0428028106689	1	texture	0.583937008160655	0	NaN
32	GRID A9	20935	lh	-47.0870513916016	17.0080223083496	-39.7561721801758	1	texture	0.0089417550414749	0	NaN
32	GRID B1	123959	lh	-44.9865036010742	-57.6213226318359	56.5441741943359	1	texture	-0.0545630530849728	0	NaN
32	GRID B10	120103	lh	-66.4986343383789	-25.0201168060303	26.1784076690674	1	tool	0.234217742581939	0	NaN
32	GRID B13	145985	lh	-59.4420928955078	-55.729621887207	22.6825218200684	1	face	0.159392473951054	0	0.434890674922156
32	GRID B14	145736	lh	-65.1842193603516	-51.0692558288574	15.7337055206299	1	tool	0.942234709131102	0	NaN
32	GRID B15	145201	lh	-66.5310363769531	-42.3576354980469	14.6687698364258	1	texture	0.29893106627846	0	NaN
32	GRID B16	177245	lh	-59.1482238769531	-65.6957092285156	6.10678863525391	1	tool	0.355361204545358	0	NaN
32	GRID B17	177185	lh	-57.3712959289551	-64.530876159668	2.99615907669067	1	tool	0.362247002201598	0	NaN
32	GRID B18	175622	lh	-66.4388580322266	-51.517822265625	-2.24994516372681	1	face	0.36061348286298	0	0.0241317374483708
32	GRID B19	175095	lh	-69.2666473388672	-50.894474029541	-11.3943367004395	1	face	0.0355096491251691	0	0.37445916389448
32	GRID B2	147268	lh	-60.9824066162109	-34.671028137207	38.3368988037109	1	tool	0.188176402910983	0	NaN
32	GRID B20	173932	lh	-69.9145278930664	-43.168025970459	-0.382359564304352	1	house	0.429134388178052	0	NaN
32	GRID B3	147662	lh	-64.7780532836914	-32.7466888427734	33.0150527954102	1	tool	0.199107835060866	0	NaN
32	GRID B4	128777	lh	-65.5431976318359	-23.8483810424805	34.6129989624023	1	tool	0.128815916117668	0	NaN
32	GRID B5	128725	lh	-62.4900016784668	-20.676549911499	34.6017189025879	1	tool	0.385946948852149	0	NaN
32	GRID B6	145045	lh	-51.9446716308594	-47.1574363708496	45.1930847167969	1	face	0.0141853977223417	0	0.0629995247525391
32	GRID B7	146992	lh	-64.1190795898438	-38.3450546264648	33.1034622192383	1	tool	0.45229564852204	0	NaN
32	GRID B8	146557	lh	-62.6930656433105	-46.2292785644531	23.5659408569336	1	tool	-0.137895719890418	0	NaN
32	GRID B9	146324	lh	-63.065055847168	-44.3799858093262	22.0810585021973	1	face	0.249331394885503	0	0.447211257459708
32	LDf1	157725	lh	-14.4884386062622	-45.2785415649414	-1.54121327400208	1	house	0.644900054311442	0	NaN
32	LDf10	173160	lh	-58.4930305480957	-56.6101684570313	-9.57919120788574	0.88923364624744	tool	0.91222694836079	0	NaN
32	LDf2	158291	lh	-11.376880645752	-41.6642379760742	-0.717551231384277	0.627898747017371	house	0.841713357151589	0	NaN
32	LDf3	33498	lh	-29.7282447814941	-49.7460327148438	-9.52187347412109	1	house	0.613933212118101	0	NaN
32	LDf4	36080	lh	-24.6373424530029	-45.6728286743164	-5.9705696105957	1	house	0.746178396247885	0	NaN
32	LDf5	169939	lh	-39.2526588439941	-66.2871627807617	-10.9040927886963	1	texture	0.827781891837206	0	NaN
32	LDf6	170213	lh	-41.6189498901367	-62.1409301757813	-12.2429637908936	0.0340097162287291	texture	1.11707901959687	0	NaN
32	LDf7	170217	lh	-47.381965637207	-57.978645324707	-13.8481426239014	0.00320039262539349	texture	1.2437051439612	0	NaN
32	LDf8	173477	lh	-52.8503112792969	-67.217887878418	-8.9445161819458	0.00649492225671671	texture	1.16550374723978	0	NaN
32	LDf9	173373	lh	-55.5243453979492	-64.2533340454102	-8.32538986206055	0.0241367049501858	tool	1.2303686846359	0	NaN
32	LDh3	37361	lh	-35.7226028442383	-29.7712211608887	-8.73906135559082	1	tool	0.472625280536072	0	NaN
32	LDh4	171207	lh	-50.6003799438477	-22.4704303741455	-4.11757612228394	1	texture	0.745137940671195	0	NaN
32	LDh5	171450	lh	-53.9285659790039	-24.0693626403809	-5.33254146575928	1	texture	0.854064499902075	0	NaN
32	LDh6	171191	lh	-57.8588409423828	-23.043083190918	-5.23374795913696	1	texture	1.13451063884704	0	NaN
32	LDh7	171311	lh	-63.124382019043	-23.6321582794189	-4.11507701873779	0.141957652461457	texture	0.970274076839823	0	NaN
32	LDh8	171434	lh	-64.8324508666992	-23.6945686340332	-2.34755969047546	0.0331950540788714	texture	1.21919920372531	0	NaN
32	LFa1	98081	rh	1.16838693618774	24.8627853393555	23.8324775695801	1	tool	0.25136966543789	0	NaN
32	LFa2	68310	lh	-0.213090568780899	25.9734477996826	38.6542472839355	1	texture	-0.00922074695024163	0	NaN
32	LFa3	67922	lh	-3.97146320343018	27.5655574798584	44.2241020202637	1	texture	0.26588257302295	0	NaN
32	LFa4	67278	lh	-0.123379521071911	33.6373329162598	50.9000549316406	1	face	-0.00714340916831052	0	0.344015707949144
32	LFa5	66960	lh	-9.27005386352539	32.0758972167969	50.2945747375488	1	house	0.105811371044099	0	NaN
32	LFa6	65555	lh	-25.8810710906982	34.9980125427246	43.1616668701172	1	tool	0.78957441130653	0	NaN
32	LFa7	53058	lh	-33.9614143371582	35.7776489257813	45.7701721191406	1	tool	0.0121803842590207	0	NaN
32	LFi1	60766	lh	-4.20647048950195	57.247917175293	2.59141421318054	1	face	0.260717196421326	0	0.328170806720077
32	LFi2	61159	lh	-1.0378885269165	68.9919815063477	6.51695013046265	1	face	0.161099907406913	0	0.287035166675089
32	LFi3	59638	lh	-17.3143501281738	65.0962295532227	14.6678895950317	1	texture	0.286975740022263	0	NaN
32	LFi4	59217	lh	-23.6960468292236	60.0947113037109	11.8815355300903	1	texture	0.479636517178447	0	NaN
32	LFi5	58862	lh	-29.7424125671387	56.4712371826172	12.9823017120361	1	face	-0.00955987935701804	0	0.31068310780733
32	LFi6	57128	lh	-43.5356979370117	52.9382362365723	2.79773736000061	1	tool	0.305168950177322	0	NaN
32	LFi7	56883	lh	-39.1903991699219	59.1856155395508	8.02284049987793	1	house	0.277652937608515	0	NaN
32	LFi8	56470	lh	-39.0393943786621	54.9778900146484	12.0931587219238	1	tool	0.757317971371978	0	NaN
32	LFm1	82210	lh	-37.1691017150879	-30.7883987426758	66.5490798950195	1	house	0.0555868502602728	0	NaN
32	LFm2	77473	lh	-38.3018264770508	-25.1478404998779	69.1682281494141	1	texture	0.265488032916991	0	NaN
32	LFm3	80578	lh	-43.7381286621094	-22.5409469604492	63.6690559387207	1	house	0.298850151891542	0	NaN
32	LFm4	81510	lh	-40.1285171508789	-9.92488098144531	64.3067474365234	1	house	0.451626799147976	0	NaN
32	LFm5	80931	lh	-38.3715744018555	3.07202434539795	59.1764793395996	1	tool	0.40482333113547	0	NaN
32	LFm6	91335	lh	-38.0875282287598	15.898362159729	54.0338973999023	1	tool	0.535165404865438	0	NaN
32	LFo1	46923	lh	-6.3103199005127	28.0712280273438	-27.3386039733887	1	face	0.0310391121010186	0	0.392339347474728
32	LFo2	2467	lh	-23.6650161743164	29.4578552246094	-24.634838104248	1	tool	0.360048683903626	0	NaN
32	LFo3	5453	lh	-35.4558906555176	29.4457244873047	-14.2089309692383	1	texture	0.496930955454355	0	NaN
32	LFo4	7431	lh	-44.6959457397461	27.3255996704102	-16.3105888366699	1	tool	0.130750983863123	0	NaN
32	LFp1	111013	lh	-20.4220542907715	-60.2235107421875	51.8134994506836	1	house	0.0454264284970007	0	NaN
32	LFp2	111254	lh	-27.5208835601807	-53.6874313354492	70.092658996582	1	tool	0.0464057736249428	0	NaN
32	LFp3	112994	lh	-27.6198558807373	-58.7302322387695	64.1514053344727	1	house	0.190162513713246	0	NaN
32	LFp4	82465	lh	-36.9111480712891	-37.574649810791	65.986572265625	1	tool	0.399308522260884	0	NaN
32	LFp5	83878	lh	-44.4442100524902	-40.2320213317871	63.2380752563477	1	tool	0.108460923285973	0	NaN
32	LFp6	85335	lh	-46.7836227416992	-26.4737739562988	62.8592491149902	1	tool	0.674892591119655	0	NaN
32	LFp7	86256	lh	-47.1421661376953	-18.9502868652344	57.1821899414063	1	tool	0.399341564113274	0	NaN
32	LFp8	83349	lh	-42.7183609008789	1.39827191829681	52.8582496643066	0.948392551588709	tool	1.40475516127681	0	NaN
32	LFx2	186004	lh	-4.71562004089355	37.8690032958984	29.2191486358643	1	tool	0.426391107995831	0	NaN
32	LFx5	65947	lh	-13.5734806060791	42.8362579345703	52.1746826171875	1	texture	1.00821121721071	0	NaN
32	LFx6	64874	lh	-17.238395690918	38.6985397338867	42.4427833557129	1	tool	0.471726508758112	0	NaN
32	LFx7	54308	lh	-36.6835861206055	28.5715599060059	37.1544570922852	1	texture	0.452848437749541	0	NaN
32	LFx8	53986	lh	-39.145133972168	29.501220703125	38.4094429016113	1	house	0.211071224760764	0	NaN
32	LO1	164649	lh	-8.57319259643555	-103.711486816406	-11.529598236084	5.04408448209771e-13	texture	11.5416803967178	1	NaN
32	LO2	163733	lh	-16.8428077697754	-97.7201538085938	-9.49905490875244	1.33534538576547e-14	texture	5.05396712021683	1	NaN
32	LO3	162621	lh	-24.9631652832031	-103.111770629883	-1.67122209072113	0.000870943314904954	texture	3.82916622101283	1	NaN
32	LO4	160091	lh	-41.9392776489258	-89.7355651855469	0.876530528068542	1.5654163736254e-16	face	5.34966111364984	1	0.00584286245356562
32	LO5	175306	lh	-41.9683990478516	-79.2954635620117	-4.8663215637207	3.2793648594559e-13	house	3.31854151755253	1	NaN
32	LO6	175045	lh	-47.2029037475586	-72.4848403930664	-1.82617437839508	0.000375688983054735	tool	3.19886807762396	1	NaN
32	LO7	172712	lh	-61.2996444702148	-56.0172691345215	-11.7224855422974	0.00110126670823667	tool	1.31272098717017	0	NaN
32	LO8	172942	lh	-57.2336730957031	-50.5233306884766	-15.1500968933105	1	tool	0.230429156425532	0	NaN
32	LTa1	36241	lh	-14.1781005859375	-30.2917137145996	-11.7592868804932	1	house	0.797399846483094	0	NaN
32	LTa2	34358	lh	-16.8342361450195	-26.5909385681152	-20.7596321105957	1	texture	0.263935644220472	0	NaN
32	LTa3	32983	lh	-20.5047416687012	-22.9776611328125	-27.802604675293	1	tool	-0.385562682341346	0	NaN
32	LTa4	30926	lh	-26.6197834014893	-12.6942729949951	-32.1881675720215	1	tool	0.010685167520213	0	NaN
32	LTa5	23434	lh	-32.482723236084	5.30662441253662	-41.3677139282227	1	tool	0.207120378031855	0	NaN
32	LTa6	23089	lh	-33.1074295043945	12.4929857254028	-45.2368431091309	1	house	0.0992154885705283	0	NaN
32	LTm1	34353	lh	-18.0337333679199	-21.5268955230713	-18.5647449493408	1	tool	0.027576349361851	0	NaN
32	LTm2	32617	lh	-21.8804607391357	-21.8252296447754	-29.7234268188477	1	tool	0.316722247498719	0	NaN
32	LTm3	25755	lh	-46.3807182312012	-9.04379463195801	-43.3989028930664	1	tool	0.265208067630449	0	NaN
32	LTm4	25173	lh	-46.1313018798828	-1.24634766578674	-44.6187896728516	1	texture	0.668375701178292	0	NaN
32	LTm5	24555	lh	-46.0849609375	6.81938934326172	-43.9078216552734	1	texture	0.192866852090135	0	NaN
32	LTm6	23905	lh	-42.6143646240234	7.11683177947998	-36.7589378356934	1	tool	0.253086087130385	0	NaN
32	LTp1	160611	lh	-25.8097133636475	-95.5291061401367	-6.26489973068237	2.95599282153343e-14	texture	3.71671002032202	1	NaN
32	LTp2	159654	lh	-26.0671901702881	-91.6724548339844	-6.01988124847412	3.79774207530561e-07	house	2.69464167727283	1	NaN
32	LTp3	171964	lh	-31.6100692749023	-81.5457229614258	-13.8575916290283	1.58374668264398e-05	house	6.80878681247792	1	NaN
32	LTp4	20429	lh	-41.0335388183594	-74.4832916259766	-19.9485397338867	3.31919079986006e-07	house	2.5501494164281	1	NaN
32	LTp5	20389	lh	-58.4211730957031	-51.4824714660645	-26.1821613311768	1	tool	1.547716411462	0	NaN
32	LTp6	27898	lh	-58.1258239746094	-46.7395858764648	-23.4507102966309	1	house	0.653774282132899	0	NaN
32	LTp7	26838	lh	-56.074649810791	-35.8287887573242	-23.4321708679199	1	tool	0.0971199726428203	0	NaN
32	LTp8	26236	lh	-62.0905151367188	-25.3698101043701	-23.8369140625	1	tool	0.124585312567769	0	NaN
32	LTx2	24082	lh	-20.7566051483154	-2.38450908660889	-38.1038856506348	1	tool	0.594004443799609	0	NaN
33	LDEa4	20226	lh	-29.135139465332	-11.5101127624512	-29.7523517608643	1	house	0.794401515265527	0	NaN
33	LDEa5	26445	lh	-29.2227935791016	-12.8764266967773	-31.4721488952637	1	face	-0.212088145067047	0	0.492796340491645
33	LDEa6	26552	lh	-38.7534484863281	-9.36154079437256	-32.3824272155762	1	house	1.54014248441513	0	NaN
33	LDEa7	24893	lh	-48.4574317932129	-13.5874242782593	-26.8312683105469	1	house	2.44582778881198	0	NaN
33	LDEa8	25491	lh	-54.3908004760742	-16.0982227325439	-27.9324626922607	1	house	1.82804191258323	0	NaN
33	LDEa9	24276	lh	-65.6110076904297	-17.6422176361084	-23.2588996887207	1	house	-0.0239569850518555	0	NaN
33	LDEm1	42505	lh	-8.16765117645264	-17.2135982513428	-20.4974174499512	1	house	0.339710806780506	0	NaN
33	LDEm10	170391	lh	-66.9467163085938	-29.9969825744629	-13.2805004119873	1	tool	0.839306120039357	0	NaN
33	LDEm5	36299	lh	-37.5176620483398	-26.2481727600098	-13.6479148864746	1	house	2.1810658436477	0	NaN
33	LDEm6	36811	lh	-37.3777160644531	-28.8048820495605	-11.6129159927368	0.355459691388	texture	1.04822203417586	0	NaN
33	LDEm7	27655	lh	-41.1236267089844	-30.060827255249	-20.9719200134277	1	texture	0.674890660226925	0	NaN
33	LDEm8	26435	lh	-53.6166534423828	-26.0129108428955	-15.7705192565918	1	house	0.397566505719739	0	NaN
33	LDEm9	26264	lh	-59.01904296875	-26.5130310058594	-12.7779140472412	1	tool	0.814430229576366	0	NaN
33	LDEp1	37240	lh	-15.619312286377	-32.2415466308594	-7.80007219314575	1	house	0.324511734916147	0	NaN
33	LDEp2	35692	lh	-17.7805328369141	-35.1996231079102	-14.1237316131592	1	house	0.556279885481653	0	NaN
33	LDEp3	34693	lh	-23.8569526672363	-34.6205139160156	-14.9447946548462	1	house	0.675790131243806	0	NaN
33	LDEp4	33596	lh	-27.5862903594971	-35.2506446838379	-15.3394584655762	0.0288905246522637	house	0.769985659310345	0	NaN
33	LDEp5	28382	lh	-43.4648818969727	-38.3226203918457	-24.8169078826904	0.0921803250877895	face	1.42803880935734	0	0.0680981492118565
33	LDEp6	28510	lh	-39.6653099060059	-47.010913848877	-19.8332748413086	1	tool	0.196336931975254	0	NaN
33	LDEp7	170777	lh	-68.4923095703125	-26.6001758575439	-16.4596099853516	1	tool	0.0959866926313357	0	NaN
33	LDEp8	172268	lh	-63.1777076721191	-35.0839385986328	-8.02378082275391	1	tool	0.400492882852106	0	NaN
33	LDHb4	35838	lh	-38.0427207946777	-22.3166065216064	-15.9102516174316	1	house	0.344628012810571	0	NaN
33	LDHb5	27282	lh	-41.3522186279297	-20.1604156494141	-24.6410751342773	1	face	0.31517611542732	0	0.459353702714144
33	LDHb6	170019	lh	-51.0272674560547	-19.6784648895264	-8.22487640380859	1	face	0.176010008644999	0	0.207223496660132
33	LDHb7	25982	lh	-51.4609794616699	-25.0463619232178	-14.9634189605713	1	tool	0.747946906105694	0	NaN
33	LDHh1	31966	lh	-21.2171764373779	-4.77212190628052	-22.044807434082	1	house	1.11506695234248	0	NaN
33	LDHh5	34095	lh	-37.0550918579102	-12.2176418304443	-22.9195823669434	1	face	0.264726779586528	0	0.365761735440573
33	LDHh6	19581	lh	-47.4865570068359	-2.08990573883057	-18.9211082458496	1	house	0.531327602230993	0	NaN
33	LDHh7	20698	lh	-48.3505706787109	-2.91697263717651	-18.8065776824951	1	house	2.22398175660825	0	NaN
33	LDHh8	21638	lh	-53.401050567627	-4.41812324523926	-16.7426719665527	1	tool	1.18455794042483	0	NaN
33	LDHh9	23597	lh	-61.1813354492188	-5.50847864151001	-28.9087791442871	1	house	2.46229716688827	0	NaN
33	LDHt1	41351	lh	-16.7570018768311	-19.8527164459229	-16.6305236816406	1	face	0.110296106848717	0	0.252021641595252
33	LDHt10	139029	lh	-64.5007934570313	-22.1795997619629	9.22025966644287	1	house	-0.210706482370907	0	NaN
33	LDHt4	37354	lh	-31.7837791442871	-27.5546283721924	-10.4798974990845	1	face	0.145632052767517	0	0.439533164077659
33	LDHt5	36965	lh	-33.5736503601074	-26.0759620666504	-11.3880281448364	1	texture	0.923528654254641	0	NaN
33	LDHt6	140275	lh	-50.0443954467773	-23.1266613006592	-3.70781373977661	1	texture	0.066676278207565	0	NaN
33	LDHt7	141722	lh	-53.9641456604004	-22.2902507781982	-3.16042971611023	1	texture	0.399611090346497	0	NaN
33	LDHt8	142577	lh	-58.421257019043	-22.9259243011475	-3.88995385169983	1	tool	0.509209021956396	0	NaN
33	LDHt9	143272	lh	-63.0046691894531	-23.0792427062988	-1.40775442123413	1	tool	0.256484919431298	0	NaN
33	LDi1	15581	lh	-42.7849426269531	-9.71302223205566	-5.90647315979004	1	house	2.63580437412538	0	NaN
33	LDi2	15290	lh	-44.103385925293	-5.43958044052124	-0.653812944889069	1	house	0.574783719975009	0	NaN
33	LDi3	18007	lh	-48.7745208740234	-10.048713684082	-6.73394155502319	1	tool	-0.134155514970407	0	NaN
33	LDi4	18563	lh	-52.582935333252	-7.54463863372803	-3.17360806465149	1	face	0.407743003041363	0	0.240269395086349
33	LDi5	18986	lh	-58.4351997375488	-3.98309707641602	-2.53421354293823	1	face	-0.00321981184458989	0	0.472430965185404
33	LOL1	153958	lh	-8.97332000732422	-74.6430587768555	-6.82122898101807	1	house	1.78060289417994	0	NaN
33	LOL10	173480	lh	-54.6621856689453	-63.9953498840332	-7.92304372787476	1	house	0.365919835156838	0	NaN
33	LOL2	153835	lh	-22.6460304260254	-69.1281509399414	-15.1143102645874	1	texture	1.60405180864069	0	NaN
33	LOL3	30346	lh	-22.4292087554932	-71.5812759399414	-7.92704010009766	0.0164084329172902	house	1.74411775698742	0	NaN
33	LOL4	32811	lh	-22.6598510742188	-73.1948852539063	-5.49823379516602	1	texture	-0.0384299720055837	0	NaN
33	LOL5	31676	lh	-23.5217952728271	-75.3129959106445	-6.41071748733521	1	house	0.142566845347943	0	NaN
33	LOL6	31145	lh	-23.3764801025391	-75.3683471679688	-8.52043151855469	1	texture	0.224045417346831	0	NaN
33	LOL7	173351	lh	-37.0043983459473	-76.2877731323242	-1.47617363929749	1	house	-0.0351760261506393	0	NaN
33	LOL8	172219	lh	-38.1845932006836	-80.401611328125	-4.67367267608643	1	texture	0.219535915962513	0	NaN
33	LOL9	171490	lh	-39.6381797790527	-85.1165313720703	-8.03611946105957	1	house	0.689150113094506	0	NaN
33	LOi1	37340	lh	-12.3291110992432	-56.7717132568359	-5.66883516311646	1.15232108286258e-06	house	5.75349673232051	1	NaN
33	LOi2	32286	lh	-26.6301651000977	-47.2773132324219	-11.0855169296265	0.0159837378310288	house	2.38217592724137	1	NaN
33	LOi3	33836	lh	-30.7887420654297	-44.2237167358398	-9.06752490997314	1	house	1.07482829729307	0	NaN
33	LOi4	34387	lh	-30.8975219726563	-43.7982139587402	-8.64995384216309	1	house	2.32433281366342	0	NaN
33	LOi5	28996	lh	-43.0576324462891	-50.5888442993164	-12.9593296051025	4.23543654303413e-05	house	3.29695721042508	1	NaN
33	LOi6	176547	lh	-43.8390312194824	-64.6205902099609	1.89696991443634	1.29650465082899e-06	face	1.54072005945308	0	0.449705614557697
33	LOi7	176249	lh	-44.3088455200195	-64.1254119873047	-2.6825840473175	1.12038701549691e-13	face	6.26519875770811	1	0.045110754611714
33	LOi8	173918	lh	-58.3025131225586	-42.717227935791	-12.8630847930908	3.98116683033662e-10	face	3.37729416306328	1	0.0119967052002
33	LOi9	174325	lh	-59.4049949645996	-45.9926567077637	-13.4688606262207	0.355459691388	house	0.730557439830022	0	NaN
33	LOp1	40834	lh	-13.2455615997314	-23.8582153320313	-9.45174217224121	1	tool	0.0780473259262958	0	NaN
33	LOp10	29439	lh	-41.0077362060547	-64.4763565063477	-12.4191226959229	4.54170950925998e-05	tool	1.78543573953858	0	NaN
33	LOp11	172906	lh	-31.5387210845947	-78.9289855957031	-2.54530048370361	1.58499287763578e-07	face	2.14442688152516	1	0.0999021473095115
33	LOp12	172903	lh	-31.100757598877	-81.3187942504883	-2.01946616172791	1.19208975212526e-14	face	6.43812517947035	1	0.00374732865497418
33	LOp2	36836	lh	-22.3434753417969	-30.9384460449219	-9.23853492736816	1	tool	0.52205912009321	0	NaN
33	LOp3	37606	lh	-28.3310527801514	-35.5777816772461	-5.48934507369995	1	tool	0.453506715252357	0	NaN
33	LOp4	35693	lh	-18.9473533630371	-35.6694488525391	-13.4682464599609	1	house	1.41737088724509	0	NaN
33	LOp5	35792	lh	-22.0501327514648	-39.7808227539063	-11.5622568130493	1	texture	2.26159738717654	0	NaN
33	LOp6	33137	lh	-30.03493309021	-40.9561767578125	-11.1757459640503	0.607447164178169	house	1.66205905375619	0	NaN
33	LOp7	33947	lh	-30.8164806365967	-43.153133392334	-9.41082572937012	0.0380291607526859	face	0.64294878313713	0	0.19801848377765
33	LOp8	29184	lh	-43.110408782959	-54.9495429992676	-12.2506942749023	1	face	-0.0827876116108881	0	0.365761735440573
33	LOp9	29230	lh	-41.9235153198242	-57.8151359558105	-11.9728593826294	5.87930078061452e-09	face	2.73095482775875	1	0.00846435324304379
33	LOs1	169205	lh	-11.7950267791748	-78.6560974121094	39.8264045715332	1	face	-0.134550298798431	0	0.450464153481265
33	LOs2	112482	lh	-21.0989646911621	-75.8622436523438	41.6488418579102	1	face	-0.197406426420319	0	0.168682796494707
33	LOs3	168443	lh	-19.8055648803711	-82.9412384033203	41.3321762084961	1	face	-0.277901677117399	0	0.225046695825913
33	LOs4	115430	lh	-18.2081432342529	-81.0102081298828	37.7276802062988	1	house	0.00428371276418158	0	NaN
33	LOs5	110196	lh	-25.4771003723145	-76.3523330688477	24.2699146270752	1	texture	0.826402166236219	0	NaN
33	LOs6	110199	lh	-26.0560417175293	-76.7635345458984	23.6592540740967	1	texture	0.275517518190941	0	NaN
33	LOs7	119154	lh	-32.5099411010742	-76.7214202880859	46.7121353149414	1	texture	0.0970484943583648	0	NaN
33	LOs8	119416	lh	-37.1002578735352	-76.4226608276367	41.6175689697266	1	tool	-0.0514475989186897	0	NaN
36	Da1	45163	lh	-5.62685012817383	2.42967700958252	-10.8813695907593	1	texture	0.207490198807223	0	NaN
36	Da2	45162	lh	-5.00541925430298	4.60667085647583	-14.4912204742432	1	texture	0.39435109761297	0	NaN
36	Da3	45157	lh	-4.08682489395142	6.47896242141724	-14.5280246734619	1	texture	0.254411162097509	0	NaN
36	Da4	30901	lh	-19.9767150878906	-2.75778198242188	-28.1538047790527	1	texture	0.246556612929122	0	NaN
36	Da5	30899	lh	-21.1965560913086	-3.31919384002686	-28.4243202209473	1	texture	0.474246892621523	0	NaN
36	Da6	2170	lh	-25.5492668151855	4.46746683120728	-21.3914070129395	1	texture	0.411630979518777	0	NaN
36	Da7	439	lh	-27.9901866912842	-3.78021574020386	-25.1618976593018	0.914020810913849	texture	0.563533590389042	0	NaN
36	Da8	13772	lh	-39.8996810913086	2.21839094161987	-16.5305652618408	1	texture	0.456666081897469	0	NaN
36	LFa1	1099	lh	-1.39016914367676	61.8694953918457	-9.08596992492676	1	house	0.0575246295910531	0	NaN
36	LFa2	568	lh	-1.1094583272934	57.5815963745117	0.540022432804108	1	house	0.207812955610604	0	NaN
36	LFa3	63046	lh	-1.17859733104706	64.9295196533203	21.9256076812744	1	texture	0.943359287776937	0	NaN
36	LFa4	63611	lh	-4.43317317962646	56.6296997070313	30.0972785949707	1	house	0.0599315511652464	0	NaN
36	LFa5	64585	lh	-10.2081451416016	48.5805168151855	38.8910446166992	1	tool	0.273449242824279	0	NaN
36	LFa6	65283	lh	-16.7314262390137	44.467960357666	47.6933097839355	1	texture	0.412826197627562	0	NaN
36	LFa7	65272	lh	-21.2690696716309	40.5864334106445	43.4099960327148	1	house	-0.0333643835836098	0	NaN
36	LFa8	64432	lh	-19.9979248046875	21.5761184692383	41.5410194396973	1	texture	0.244881159070766	0	NaN
36	LFo1	2490	lh	-17.8442306518555	48.4770851135254	-22.1323699951172	1	texture	-0.23927328132468	0	NaN
36	LFo2	3681	lh	-20.8829879760742	49.1709251403809	-20.1042137145996	1	face	-0.0857273409968809	0	0.396630147854703
36	LFo3	5765	lh	-32.5523681640625	46.1239624023438	-19.4891147613525	1	texture	0.0875434845114841	0	NaN
36	LFo4	6980	lh	-37.2225112915039	41.2803573608398	-14.7857856750488	1	house	0.190740710127322	0	NaN
36	LFp2	112206	lh	-13.2758255004883	-77.6599273681641	54.5697402954102	0.122218210149375	texture	0.619462860696967	0	NaN
36	LFp3	110868	lh	-16.6901054382324	-62.8677978515625	63.5111694335938	1	texture	0.485775912505651	0	NaN
36	LFp4	112146	lh	-23.8679370880127	-61.2830352783203	61.2154693603516	1	tool	0.102812506465625	0	NaN
36	LFp5	79934	lh	-26.9351558685303	-30.8788452148438	75.8023071289063	1	tool	0.216676539737296	0	NaN
36	LFp6	79842	lh	-28.516040802002	-29.0208778381348	67.94775390625	1	face	0.0469993223294967	0	0.39117965563396
36	LFp7	76044	lh	-26.2973823547363	-12.4994039535522	67.9271697998047	1	face	0.174642692494123	0	0.29444127708786
36	LFp8	73427	lh	-25.4168682098389	-0.427148282527924	51.8338851928711	1	house	0.0405627623195234	0	NaN
36	LTa5	23177	lh	-19.9161796569824	3.47245287895203	-40.8391799926758	1	face	-0.137950277417923	0	0.200964363878953
36	LTa6	21823	lh	-20.4504356384277	15.7660818099976	-41.6703147888184	1	house	-0.0602563923077956	0	NaN
36	LTm1	36583	lh	-25.0322761535645	-28.8015975952148	-9.57434749603271	1	texture	0.388913989085527	0	NaN
36	LTm2	34022	lh	-17.4205894470215	-20.3840942382813	-20.0215797424316	1	texture	0.11869744084231	0	NaN
36	LTm3	31588	lh	-16.8319835662842	-10.7309017181396	-29.2201633453369	1	texture	-0.0755983735482937	0	NaN
36	LTm4	24194	lh	-24.7284259796143	-1.86214518547058	-37.9362297058105	1	texture	0.031889107132852	0	NaN
36	LTm5	23172	lh	-20.8493328094482	1.04091715812683	-39.0960121154785	1	house	-0.0752478750501944	0	NaN
36	LTm6	21687	lh	-18.900390625	9.41872501373291	-36.5747985839844	1	house	0.224142049545103	0	NaN
36	LTp1	150313	lh	-16.6526432037354	-85.4105453491211	-9.78670120239258	5.22154015517228e-18	texture	11.9590067461792	1	NaN
36	LTp2	30856	lh	-26.4382019042969	-63.273307800293	-16.5444259643555	1.09552548024893e-18	house	4.88444421920589	1	NaN
36	LTp3	29781	lh	-32.9583587646484	-58.1756553649902	-17.8483905792236	7.35307833902732e-15	texture	3.81615130242951	1	NaN
36	LTp4	29207	lh	-33.3025932312012	-45.5736236572266	-24.4988212585449	6.58211525148923e-14	texture	3.03457889970557	1	NaN
36	LTp5	27895	lh	-57.0867576599121	-47.9971733093262	-26.1931343078613	1.76248076279573e-06	texture	2.09263112586296	1	NaN
36	LTp6	27003	lh	-52.4182395935059	-36.2357940673828	-23.2112064361572	1	texture	0.278748995428768	0	NaN
36	LTx2	2818	lh	-19.6754837036133	23.1993026733398	-26.2206954956055	1	face	-0.302626914277536	0	0.325386101140583
36	LTx3	4837	lh	-32.3167304992676	25.8274574279785	-25.0097961425781	1	face	-0.0908085334767401	0	0.335427815042983
36	LTx4	5822	lh	-38.9562301635742	24.0149993896484	-19.7090339660645	1	texture	0.167391956598031	0	NaN
36	Lo1	173758	lh	-26.2549304962158	-88.0010299682617	-5.78820943832397	5.36999423928013e-08	texture	3.72226153297259	1	NaN
36	Lo2	171854	lh	-32.4921836853027	-79.7351684570313	-7.71273469924927	5.89800533590198e-20	face	6.25038284147899	1	0.0148319284027314
36	Lo3	172569	lh	-36.6179275512695	-78.6545867919922	-3.3546769618988	1.27428901407004e-14	face	2.32717614130359	1	0.315863250479044
36	Lo4	175750	lh	-43.4092063903809	-64.0687103271484	0.489115327596664	1	tool	0.642361594898666	0	NaN
36	Lo5	177687	lh	-43.2608528137207	-75.6900939941406	13.9987688064575	1	face	-0.0670766477680251	0	0.0752319801292387
36	Lo6	141371	lh	-39.4835319519043	-57.3602523803711	22.3623218536377	1	texture	-0.00724587219743046	0	NaN
36	Lo7	141740	lh	-40.7326812744141	-58.759147644043	28.2739028930664	1	texture	0.0236493187027555	0	NaN
36	Lo8	125853	lh	-45.8652496337891	-46.0278930664063	41.2380714416504	1	tool	0.0393472149026837	0	NaN
36	Lp1	115236	lh	-19.1873760223389	-81.6823577880859	38.5289573669434	1	house	-0.00247007390492772	0	NaN
36	Lp2	114085	lh	-24.0691452026367	-73.8039398193359	48.7127685546875	1	tool	0.547339438028418	0	NaN
36	Lp3	113289	lh	-13.7608423233032	-74.508171081543	50.0665893554688	1	house	0.223784817059551	0	NaN
36	Lp4	114483	lh	-22.928897857666	-67.8511047363281	47.8091888427734	1	tool	0.514700614294564	0	NaN
36	Lp5	115081	lh	-32.7987823486328	-66.5213241577148	42.3775863647461	1	face	0.328042220331339	0	0.292736366945874
36	Lp6	114337	lh	-35.268238067627	-53.2238159179688	66.7046813964844	1	face	-0.00735179476362482	0	0.304066474338465
39	LDa1	16042	rh	6.3201847076416	-8.45859527587891	-17.1839027404785	0.636231466565792	texture	0.252269987938576	0	NaN
39	LDa10	13781	lh	-40.4824447631836	2.8319263458252	-10.1554479598999	1	texture	0.828403833433706	0	NaN
39	LDa2	44862	lh	-4.676598072052	0.0378550887107849	-12.4615955352783	0.984270135881382	texture	0.308871160062022	0	NaN
39	LDa3	44543	lh	-7.0551609992981	0.0218418091535568	-14.5213890075684	0.15212917373617	texture	0.380225114094086	0	NaN
39	LDa4	31305	lh	-22.7133731842041	-3.660151720047	-27.4419097900391	1	face	0.493123809635989	0	0.114061597901459
39	LDa7	42564	lh	-21.5733184814453	0.492234617471695	-22.1971969604492	1	face	0.247383499279494	0	0.350895296235175
39	LDa8	307	lh	-25.4770946502686	-1.4024395942688	-21.9915580749512	0.612525863841317	texture	0.572808493642336	0	NaN
39	LDa9	1785	lh	-26.0909900665283	2.38028287887573	-21.9060230255127	0.717681280063456	texture	0.490856947226385	0	NaN
39	LDh7	16486	lh	-40.4904899597168	-11.0507011413574	-8.20690250396729	1	texture	0.262246075823375	0	NaN
39	LDh8	19880	lh	-49.8322868347168	-9.47815132141113	-17.0996551513672	1	texture	0.260004839878067	0	NaN
39	LDh9	20093	lh	-53.757884979248	-16.4510536193848	-8.2547607421875	1	texture	0.349299274960832	0	NaN
39	LDp1	36584	lh	-23.1164283752441	-28.1322631835938	-9.43598747253418	1	house	0.101552624909957	0	NaN
39	LDp2	37233	lh	-28.6001014709473	-34.0053253173828	-7.34279537200928	1	texture	0.30078144534057	0	NaN
39	LDp3	35204	lh	-20.6495208740234	-34.2744064331055	-14.6398153305054	1	tool	0.367718632565171	0	NaN
39	LDp4	34589	lh	-25.1521053314209	-35.6737251281738	-14.7977228164673	1	texture	0.0137877496252151	0	NaN
39	LDp5	33939	lh	-29.7430896759033	-37.2533683776855	-13.5347080230713	1	house	0.223716015204483	0	NaN
39	LDp6	29236	lh	-40.3519287109375	-61.8954048156738	-11.8114852905273	1	texture	0.115181502731759	0	NaN
39	LDp7	169667	lh	-40.9248428344727	-61.5364799499512	-11.7550411224365	1	texture	0.148904737700288	0	NaN
39	LDp8	170483	lh	-46.9551963806152	-58.9391937255859	-14.2968673706055	1	tool	0.0442276452328764	0	NaN
39	LGD1	16691	lh	-40.0714988708496	21.814359664917	-33.1046676635742	1	house	0.033332800375197	0	NaN
39	LGD10	17633	lh	-53.7975463867188	19.6518707275391	-20.4869899749756	1	tool	0.0649418906706898	0	NaN
39	LGD11	18178	lh	-58.0925369262695	12.281644821167	-12.9879741668701	1	texture	0.0322663059875011	0	NaN
39	LGD12	18920	lh	-59.3849411010742	2.88563084602356	-11.0395069122314	1	house	0.11115985853643	0	NaN
39	LGD13	19847	lh	-64.360725402832	-12.7527160644531	-0.961492776870728	1	texture	0.00758525404450102	0	NaN
39	LGD14	23848	lh	-62.6966094970703	-8.78300094604492	-9.14154529571533	1	texture	0.117348691757993	0	NaN
39	LGD15	25428	lh	-68.5134506225586	-19.6069717407227	-12.1241865158081	1	tool	0.152678917480301	0	NaN
39	LGD16	171916	lh	-70.6640319824219	-33.1099853515625	-5.16288375854492	1	texture	-0.0302854928180936	0	NaN
39	LGD17	54501	lh	-52.839111328125	35.1912574768066	6.04291105270386	1	tool	-0.037999051850433	0	NaN
39	LGD18	17271	lh	-50.7518424987793	17.6337890625	-12.9343271255493	1	texture	0.0522687294257751	0	NaN
39	LGD19	17648	lh	-48.6918678283691	7.28149509429932	-8.92706298828125	1	texture	0.289490223542732	0	NaN
39	LGD2	18343	lh	-52.8500747680664	15.1337862014771	-26.4518661499023	1	tool	0.0220872183049308	0	NaN
39	LGD20	18196	lh	-48.9119567871094	-4.77175807952881	-3.61869883537292	1	texture	0.382580375264924	0	NaN
39	LGD21	19131	lh	-57.6950645446777	-4.69546747207642	-1.29475522041321	0.589611736601118	texture	1.00269890688329	0	NaN
39	LGD22	139223	lh	-64.5003814697266	-13.9180059432983	5.9619927406311	1	tool	0.345541697561985	0	NaN
39	LGD23	139024	lh	-63.7654266357422	-20.1839447021484	7.5746021270752	1	texture	0.716507355739727	0	NaN
39	LGD24	145125	lh	-58.9404525756836	-29.7141227722168	15.0594902038574	1	house	0.704735205725346	0	NaN
39	LGD25	53273	lh	-52.861946105957	22.6598606109619	-3.19454860687256	1	texture	-0.0491931728609276	0	NaN
39	LGD26	51925	lh	-57.0061302185059	16.5436172485352	1.09109687805176	1	texture	0.102919313862399	0	NaN
39	LGD27	98868	lh	-58.078239440918	9.92913818359375	16.3668231964111	1	texture	0.312222603850739	0	NaN
39	LGD28	96946	lh	-57.0004348754883	1.44905436038971	4.54185199737549	1	texture	0.391770143545273	0	NaN
39	LGD29	94998	lh	-57.7445030212402	-2.05490469932556	12.1534872055054	1	texture	0.744469695710386	0	NaN
39	LGD3	21088	lh	-56.8307838439941	7.47707605361938	-32.5509567260742	1	house	0.0223235945357133	0	NaN
39	LGD30	94497	lh	-65.5088653564453	-2.35353851318359	14.9844379425049	1	texture	0.571732735958919	0	NaN
39	LGD31	149475	lh	-63.580322265625	-22.4041576385498	13.1210441589355	1	texture	0.778183149450682	0	NaN
39	LGD32	149355	lh	-66.9568176269531	-26.8668460845947	18.5788650512695	1	house	0.316656301604266	0	NaN
39	LGD33	52790	lh	-56.6718368530273	28.2913303375244	1.94785463809967	1	tool	-0.08503620067224	0	NaN
39	LGD34	99386	lh	-60.6232452392578	19.8725967407227	23.9812774658203	1	texture	0.14302319544278	0	NaN
39	LGD35	98908	lh	-63.2350387573242	9.97098064422607	22.7475872039795	1	texture	0.275109854753002	0	NaN
39	LGD36	95932	lh	-55.0899810791016	2.10792970657349	14.4457845687866	1	texture	0.368869481531762	0	NaN
39	LGD37	94048	lh	-53.4889335632324	-2.74669647216797	16.9044818878174	1	texture	0.0980142321376555	0	NaN
39	LGD38	92812	lh	-64.4534149169922	-6.09741592407227	20.776927947998	1	texture	0.56432273470584	0	NaN
39	LGD39	92082	lh	-64.1700744628906	-11.5452260971069	22.8402347564697	1	texture	0.320989054088014	0	NaN
39	LGD4	22881	lh	-56.6551895141602	-4.60342121124268	-30.4423294067383	1	tool	0.357880398951695	0	NaN
39	LGD40	129623	lh	-59.0481796264648	-24.2301750183105	23.2457695007324	1	texture	0.388539237544409	0	NaN
39	LGD41	51657	lh	-59.3105926513672	25.5497245788574	8.98845291137695	1	texture	0.0817784429233933	0	NaN
39	LGD42	99309	lh	-57.4440765380859	25.3405685424805	22.7563343048096	1	texture	0.215919170512405	0	NaN
39	LGD43	98709	lh	-53.280590057373	16.2115821838379	31.4357376098633	1	texture	0.205861239948982	0	NaN
39	LGD44	94142	lh	-53.3681297302246	2.86750817298889	20.6464862823486	1	texture	0.279812768717111	0	NaN
39	LGD45	93248	lh	-58.5466842651367	1.6537858247757	18.5269603729248	1	tool	0.14247471409683	0	NaN
39	LGD46	91521	lh	-62.6272163391113	7.33077049255371	27.6826782226563	1	texture	0.450897971792535	0	NaN
39	LGD47	89546	lh	-64.4616165161133	-8.95958614349365	31.3116149902344	1	texture	0.677984565200335	0	NaN
39	LGD48	129213	lh	-55.1659622192383	-23.4997253417969	26.4414978027344	1	texture	0.400069257510786	0	NaN
39	LGD49	171775	lh	-65.0533599853516	-42.2618103027344	-16.5432510375977	1	house	0.397342179126307	0	NaN
39	LGD5	24267	lh	-55.7409591674805	-12.1360025405884	-29.4522762298584	1	texture	0.207478474936919	0	NaN
39	LGD50	174624	lh	-67.2807006835938	-49.2722778320313	-16.9858913421631	1	house	0.190189927948373	0	NaN
39	LGD51	175715	lh	-61.7827301025391	-45.0892105102539	-6.19876337051392	1	texture	-0.153816260022487	0	NaN
39	LGD52	145095	lh	-53.4026870727539	-48.8251571655273	11.8983173370361	1	house	0.198443312949774	0	NaN
39	LGD53	148826	lh	-66.1844100952148	-29.1546592712402	28.8712120056152	1	tool	0.296552241933067	0	NaN
39	LGD54	128685	lh	-65.0954055786133	-26.7676239013672	36.4178009033203	1	tool	0.426428678632778	0	NaN
39	LGD55	127830	lh	-54.1047325134277	-22.9888687133789	47.2467651367188	1	house	0.323407437139103	0	NaN
39	LGD56	126633	lh	-43.4059829711914	-26.8444423675537	47.88623046875	1	house	0.0970156074237134	0	NaN
39	LGD57	170774	lh	-69.6804046630859	-26.3177318572998	-20.5206336975098	1	texture	0.649493251256593	0	NaN
39	LGD58	173622	lh	-68.0899658203125	-40.4477729797363	6.55240440368652	1	texture	0.470143331871985	0	NaN
39	LGD59	143806	lh	-64.655029296875	-31.6574554443359	9.45455551147461	1	house	0.188750797576486	0	NaN
39	LGD6	24387	lh	-64.3302154541016	-14.8842115402222	-19.7573471069336	1	texture	0.326237982962445	0	NaN
39	LGD60	144819	lh	-67.7110443115234	-39.890510559082	13.140251159668	1	tool	0.329274024104893	0	NaN
39	LGD61	129425	lh	-65.6760635375977	-22.4212455749512	25.9549827575684	1	house	0.550884440765221	0	NaN
39	LGD62	129144	lh	-58.0366134643555	-24.2208671569824	28.2400588989258	1	tool	0.665752440085811	0	NaN
39	LGD63	128754	lh	-50.332878112793	-24.363302230835	30.2408065795898	1	texture	0.508687643566508	0	NaN
39	LGD7	25021	lh	-68.9274749755859	-18.9378490447998	-14.4110164642334	1	texture	0.223679854558951	0	NaN
39	LGD8	170775	lh	-69.9457244873047	-25.7088088989258	-19.0739440917969	1	tool	0.0263432089590478	0	NaN
39	LGD9	17028	lh	-45.5696678161621	23.1777496337891	-20.6776390075684	1	tool	0.00584396951289179	0	NaN
39	LOi1	166006	lh	-7.78852081298828	-93.4660034179688	-3.81165337562561	6.45449448935361e-23	texture	16.4677037160263	1	NaN
39	LOi2	150199	lh	-11.5933513641357	-89.462287902832	-14.981348991394	1.04882433537552e-22	texture	43.68349078912	1	NaN
39	LOi3	163379	lh	-12.468358039856	-90.1327514648438	-13.9369201660156	7.1911384492433e-23	texture	33.2775226857665	1	NaN
39	LOi4	162346	lh	-17.3489151000977	-86.3455352783203	-13.8438701629639	2.7775113240488e-20	texture	13.5009531643292	1	NaN
39	LOi5	169488	lh	-24.0754852294922	-76.9243240356445	-15.2306022644043	1.08769329977067e-13	tool	4.81006856385891	1	NaN
39	LOi6	171352	lh	-32.3444900512695	-83.2944259643555	-16.2854690551758	1.64220466534443e-05	texture	2.3690904910161	1	NaN
39	LOs5	177451	lh	-50.4663581848145	-76.1667327880859	15.5282974243164	0.558818589447935	face	0.66005871990898	0	0.208371578365225
39	LOs6	178269	lh	-46.2554054260254	-76.4940567016602	22.5173225402832	1	tool	0.399707299878725	0	NaN
39	LOs7	175604	lh	-51.2443237304688	-57.015811920166	-5.60831069946289	1	tool	0.253286632711853	0	NaN
39	LOs8	177493	lh	-56.8421745300293	-59.192268371582	3.91446757316589	1	house	0.210744024542277	0	NaN
39	LTa1	12548	lh	-23.1871204376221	7.30416774749756	-28.4610862731934	0.991392141056808	face	0.368051145048066	0	0.0399400145476826
39	LTa2	21423	lh	-19.176929473877	8.23818111419678	-34.5715408325195	1	face	0.345097564261236	0	0.020425937192524
39	LTa3	23073	lh	-30.5235614776611	6.4640965461731	-41.189323425293	1	face	0.0437507487058192	0	0.251485790773988
39	LTa4	23550	lh	-32.5611305236816	5.30136108398438	-42.4850425720215	1	house	-0.110518108233858	0	NaN
39	LTa5	23787	lh	-39.0793418884277	12.2106437683105	-42.1904716491699	1	house	-0.152783419118297	0	NaN
39	LTa6	22125	lh	-44.7435073852539	7.74593496322632	-35.7856979370117	1	texture	0.126097041036461	0	NaN
39	LTm1	34134	lh	-17.2671184539795	-21.3178272247314	-19.765417098999	1	texture	0.428174568143796	0	NaN
39	LTm2	32861	lh	-20.2018756866455	-21.7209854125977	-28.2679271697998	1	tool	0.57541634896916	0	NaN
39	LTm3	30672	lh	-30.6809310913086	-27.1095523834229	-31.66796875	1.4733004952945e-11	face	4.99562443662135	1	5.91497273293864e-10
39	LTm4	26392	lh	-44.3098449707031	-15.9987735748291	-36.8547019958496	1	tool	0.210717310364894	0	NaN
39	LTm5	26137	lh	-55.1627769470215	-21.9722709655762	-33.6087493896484	1	house	0.312415297703241	0	NaN
39	LTm6	25681	lh	-58.1372985839844	-16.1856536865234	-28.2381038665771	1	house	0.520927030207884	0	NaN
39	LTo1	29907	lh	-31.245002746582	-60.7756729125977	-18.5349578857422	3.52274941329185e-14	face	2.13685452058793	1	0.0807868589899933
39	LTo2	29843	lh	-36.0393600463867	-63.0404739379883	-18.0175247192383	6.40575925319641e-14	face	13.4358626476328	1	1.61189727599263e-12
39	LTo3	170326	lh	-41.4206771850586	-82.5858306884766	-16.7787971496582	2.35812234522815e-06	tool	3.37057675625627	1	NaN
39	LTo4	170364	lh	-64.6393127441406	-51.0870590209961	-24.7072334289551	1	texture	0.361417289341033	0	NaN
39	LTo5	27895	lh	-57.0867576599121	-47.9971733093262	-26.1931343078613	1	texture	0.30300960188601	0	NaN
39	LTo6	170641	lh	-67.8848037719727	-29.5465927124023	-23.8072452545166	1	texture	0.392707321169289	0	NaN
39	LTp1	30846	lh	-26.5291137695313	-53.4649353027344	-16.797492980957	1.28736472024318e-13	house	3.54898614932705	1	NaN
39	LTp2	29288	lh	-30.0919723510742	-45.8408508300781	-20.6184692382813	4.59428387046589e-11	face	8.60209683123939	1	1.54155083025273e-12
39	LTp3	29214	lh	-40.2117691040039	-48.5175971984863	-21.5268039703369	1	face	0.550492396280567	0	0.00079043534035958
39	LTp4	28836	lh	-37.6936187744141	-44.5211753845215	-16.561861038208	0.00126607030922599	face	1.35543522539318	0	0.00913258967011372
39	LTp5	27531	lh	-44.103157043457	-40.8698234558105	-30.5173683166504	1	tool	0.378109083887743	0	NaN
39	LTp6	27155	lh	-53.3704872131348	-37.9185409545898	-29.8694381713867	0.984270135881382	house	0.485981598538549	0	NaN
39	Lo1	165214	lh	-3.67326498031616	-98.0435104370117	-10.7547168731689	3.10677691360219e-19	texture	9.75260804306101	1	NaN
39	Lo2	164543	lh	-8.61940002441406	-100.320945739746	-17.8656349182129	6.21954349656237e-09	texture	5.95216733963501	1	NaN
39	Lo3	161639	lh	-26.0745677947998	-97.0890960693359	-8.36031055450439	1.25587057570359e-09	texture	4.84502108501602	1	NaN
39	Lo4	161006	lh	-26.1350212097168	-96.4684753417969	-5.93913650512695	0.0238210595333192	texture	3.46793734857079	1	NaN
39	Lo5	160482	lh	-31.0037460327148	-96.8059234619141	-9.30291748046875	9.40837829028684e-13	texture	4.65507847072637	1	NaN
39	Lo6	159658	lh	-30.7553749084473	-91.8832397460938	-9.56667423248291	3.54561209069695e-17	tool	3.76063604515303	1	NaN
39	Lo7	174858	lh	-41.0408630371094	-74.9294662475586	-2.58604621887207	0.402447725300186	tool	0.332632112478303	0	NaN
39	Lo8	174504	lh	-50.2988548278809	-54.2872009277344	-6.21652126312256	1	house	0.38500722038468	0	NaN
39	Ltx1	15720	lh	-36.5023612976074	25.1015586853027	-26.5223331451416	1	house	-0.0166404407978091	0	NaN
39	Ltx2	15228	lh	-27.7480220794678	24.1482887268066	-31.4978084564209	1	face	0.294254883329044	0	0.048483916885473
39	Ltx3	21428	lh	-19.6218147277832	12.8661422729492	-37.0992240905762	1	face	0.352810663247086	0	0.27516724547978
39	Ltx4	23073	lh	-30.5235614776611	6.4640965461731	-41.189323425293	1	house	0.295260040096064	0	NaN
44	RDa1	14665	rh	9.30973339080811	0.408637315034866	-14.8129920959473	1	texture	0.185685104300896	0	NaN
44	RDa2	21569	rh	25.6447238922119	-3.28103351593018	-23.1876888275146	1	texture	0.105180107975684	0	NaN
44	RDa3	12950	rh	19.8041534423828	-2.78229570388794	-16.3691673278809	1	texture	0.422548835191465	0	NaN
44	RDa4	12942	rh	28.2369232177734	-6.08721971511841	-18.0205516815186	1	texture	0.329523607485758	0	NaN
44	RDa5	12816	rh	35.6382789611816	-5.96360397338867	-21.6571807861328	1	texture	0.547938393526552	0	NaN
44	RDa6	13752	rh	39.2263107299805	-8.2606258392334	-22.0667133331299	1	house	0.878313193398634	0	NaN
44	RDa7	44950	rh	42.1507873535156	-1.92158794403076	-11.3333110809326	1	face	0.31491212414092	0	0.348501271352268
44	RDa8	37655	rh	49.7013359069824	6.52547788619995	-25.9864921569824	1	texture	0.381375600629534	0	NaN
44	RDh1	15370	rh	12.6083955764771	-6.72497177124023	-15.8556079864502	1	texture	0.326539704654491	0	NaN
44	RDh2	15655	rh	15.9806652069092	-9.67124938964844	-16.4807815551758	1	texture	0.0158249967077431	0	NaN
44	RDh3	15838	rh	19.7333106994629	-12.3823261260986	-13.9425754547119	1	tool	0.626114936152235	0	NaN
44	RDh4	15546	rh	26.0469779968262	-12.447943687439	-11.8368806838989	1	tool	0.398273405928411	0	NaN
44	RDh5	15916	rh	34.2570495605469	-17.8585739135742	-18.3544654846191	1	texture	0.31695479484068	0	NaN
44	RDh6	16181	rh	37.634880065918	-17.1183280944824	-18.921085357666	1	texture	0.158723450033554	0	NaN
44	RDh7	39150	rh	52.1740074157715	-24.2315425872803	-9.62671756744385	1	face	0.339056358786936	0	0.495252991413136
44	RDh8	38747	rh	51.8706970214844	-18.4436569213867	-11.6400871276855	1	house	-0.0320008412317723	0	NaN
44	RDp2	25132	rh	9.07296848297119	-49.1671104431152	1.09884607791901	1	texture	0.216299561847044	0	NaN
44	RDp3	24705	rh	12.4770526885986	-42.4804077148438	-5.92267799377441	1	texture	0.324733383543626	0	NaN
44	RDp4	24702	rh	14.735987663269	-42.7611465454102	-9.93651103973389	1	house	1.54477817771726	0	NaN
44	RDp5	27147	rh	28.9449195861816	-40.2492904663086	-11.8683929443359	0.0231957629403759	house	2.19609519272471	1	NaN
44	RDp6	29158	rh	43.5381278991699	-45.5240135192871	-26.051139831543	0.00293403493847662	house	1.36978814896348	0	NaN
44	RDp7	29243	rh	44.4444465637207	-43.6368637084961	-23.2674541473389	0.00239881773046858	texture	0.626264066787122	0	NaN
44	RFm1	55596	rh	12.21608543396	62.2811660766602	-6.62590599060059	1	tool	0.0399841231574792	0	NaN
44	RFm2	58302	rh	36.972469329834	59.276725769043	-10.6355924606323	1	texture	0.153226912264367	0	NaN
44	RFm3	58346	rh	35.6484146118164	60.2051239013672	-4.85606861114502	1	texture	0.0671605728706943	0	NaN
44	RFm4	58274	rh	41.2943992614746	59.4838371276855	3.33488607406616	1	tool	0.309231522606645	0	NaN
44	RFm5	58505	rh	41.2852630615234	57.1103019714355	-0.185063347220421	1	house	0.117439799564242	0	NaN
44	RFm6	60703	rh	39.5026817321777	49.9180107116699	26.4932594299316	1	texture	-0.179805293535112	0	NaN
44	RFm7	61765	rh	44.2603607177734	44.0326881408691	26.6058349609375	1	face	-0.132484708671449	0	0.489645422084939
44	RFm8	184133	rh	58.9505767822266	19.2600975036621	30.3138084411621	1	house	-0.0108690577000396	0	NaN
44	RFo1	7420	rh	16.4886989593506	44.1790008544922	-25.8006744384766	1	house	0.0583635200244762	0	NaN
44	RFo2	6797	rh	20.5848617553711	39.2202224731445	-23.4478340148926	1	house	0.0675640382312507	0	NaN
44	RFo3	6039	rh	28.7713890075684	40.3437805175781	-20.7848205566406	1	texture	0.105427608509393	0	NaN
44	RFo4	2750	rh	52.6171493530273	21.4478759765625	-12.7885293960571	1	house	0.0515189435156245	0	NaN
44	RGRd1	163669	rh	27.5008869171143	-96.8515396118164	12.8250970840454	2.51910481287243e-22	house	16.734586440374	1	NaN
44	RGRd10	166369	rh	42.0172805786133	-83.6575317382813	27.9142532348633	0.014279617493321	house	4.05253406191416	1	NaN
44	RGRd11	166894	rh	46.3604545593262	-76.0408096313477	28.3593883514404	1	house	0.428436070516654	0	NaN
44	RGRd12	169187	rh	43.2789039611816	-62.491886138916	28.618688583374	1	house	0.37592173377896	0	NaN
44	RGRd13	189648	rh	58.0854148864746	-55.7729949951172	39.8097686767578	1	tool	0.0291845834076537	0	NaN
44	RGRd14	190318	rh	57.8131217956543	-49.3819007873535	39.6806907653809	1	face	0.194009975018399	0	0.279275426259279
44	RGRd15	193601	rh	62.4487838745117	-44.9273300170898	37.920841217041	1	face	-0.068314867217877	0	0.196890441204817
44	RGRd16	193506	rh	62.5067863464355	-34.7424507141113	32.1821250915527	1	house	0.234160242922781	0	NaN
44	RGRd17	3818	rh	51.2715377807617	33.525463104248	-17.2437114715576	1	face	0.125878434552878	0	0.469255194353731
44	RGRd18	59893	rh	53.9237670898438	42.9141845703125	3.40875053405762	1	house	0.245149589959267	0	NaN
44	RGRd19	59923	rh	53.9035758972168	34.7564926147461	5.15691757202148	1	texture	-0.0949730302529647	0	NaN
44	RGRd2	164882	rh	33.8336486816406	-92.6221618652344	13.7517242431641	1.12056048937533e-06	house	3.27704007360188	1	NaN
44	RGRd20	62822	rh	63.0390434265137	20.3306331634521	4.69984579086304	1	house	0.249263171231707	0	NaN
44	RGRd21	184347	rh	60.6495895385742	14.0618419647217	8.48267078399658	1	face	-0.152502424822027	0	0.38002523481217
44	RGRd22	186016	rh	59.5589447021484	7.5739631652832	-0.536304116249084	1	house	0.0936129229656757	0	NaN
44	RGRd23	188694	rh	69.5199966430664	-11.1137990951538	16.7003879547119	1	texture	0.541694827040393	0	NaN
44	RGRd24	191873	rh	68.4607162475586	-28.7422828674316	25.5243434906006	1	house	0.0909102582957514	0	NaN
44	RGRd25	3239	rh	53.1555137634277	28.7615833282471	-15.3923768997192	1	texture	0.0401777336221256	0	NaN
44	RGRd26	2524	rh	56.3581695556641	35.5737800598145	-12.7208576202393	1	house	0.0915268982368034	0	NaN
44	RGRd27	60026	rh	59.1352691650391	34.5649261474609	1.56276559829712	1	tool	0.0810063239529538	0	NaN
44	RGRd28	61163	rh	59.5427589416504	31.5191822052002	1.94846606254578	1	face	-0.108422028717932	0	0.441661667107363
44	RGRd29	41647	rh	61.0034370422363	-0.669520020484924	3.1794970035553	1	house	0.16010199440291	0	NaN
44	RGRd3	165583	rh	43.1554946899414	-76.1231994628906	10.6494235992432	1	tool	0.251772837367453	0	NaN
44	RGRd30	40998	rh	66.5948486328125	-3.59936213493347	-8.90884208679199	1	texture	-0.0474911683897416	0	NaN
44	RGRd31	188159	rh	68.308708190918	-5.29624509811401	11.0166025161743	1	house	0.611947897927912	0	NaN
44	RGRd32	197503	rh	67.8999938964844	-27.1144218444824	11.6002407073975	1	house	0.316802166242079	0	NaN
44	RGRd33	2869	rh	51.728385925293	21.1817684173584	-14.7936172485352	1	house	0.248384179851937	0	NaN
44	RGRd34	2502	rh	52.2090454101563	18.7874755859375	-12.2314586639404	1	house	0.286262769644207	0	NaN
44	RGRd35	41746	rh	55.1050834655762	16.4443035125732	-9.71786689758301	1	texture	0.0923056717837318	0	NaN
44	RGRd36	41228	rh	59.9458847045898	14.0406427383423	-8.67003631591797	1	texture	0.0607428898813376	0	NaN
44	RGRd39	198161	rh	68.2182159423828	-25.7742938995361	3.58850646018982	1	tool	-0.100844363690744	0	NaN
44	RGRd4	165836	rh	40.5363998413086	-71.3597946166992	9.15524005889893	1	face	0.0574147923207516	0	0.287984892865884
44	RGRd40	197550	rh	70.2802047729492	-29.5324821472168	9.73137664794922	1	texture	0.426216451631494	0	NaN
44	RGRd41	35640	rh	47.3369445800781	21.8193740844727	-37.6913223266602	1	house	0.18890500839626	0	NaN
44	RGRd42	36278	rh	47.1240119934082	22.6607036590576	-29.8780212402344	1	texture	0.325830960975688	0	NaN
44	RGRd43	41339	rh	49.9881057739258	23.7217330932617	-20.7826099395752	1	texture	0.424676062507705	0	NaN
44	RGRd44	40535	rh	54.8005676269531	20.6965141296387	-23.7580375671387	1	face	0.16697548458094	0	0.485761662296093
44	RGRd47	198540	rh	70.3352890014648	-20.0347423553467	0.45510870218277	1	texture	-0.0721364221616157	0	NaN
44	RGRd48	198074	rh	65.4003219604492	-32.2751312255859	-1.96462118625641	1	house	0.565047338712393	0	NaN
44	RGRd5	152677	rh	40.6639938354492	-56.0216598510742	9.5626335144043	1	tool	-0.137945088949484	0	NaN
44	RGRd50	35643	rh	47.7491302490234	21.4270324707031	-38.9863777160645	1	house	0.113079047494973	0	NaN
44	RGRd51	36711	rh	46.9493827819824	19.0715503692627	-28.9070987701416	1	house	0.179919884188808	0	NaN
44	RGRd52	37193	rh	50.7650375366211	16.9999504089355	-28.0264682769775	1	house	0.0299901937138177	0	NaN
44	RGRd53	37075	rh	67.4396209716797	-2.60372018814087	-18.5048198699951	1	house	0.193879840013756	0	NaN
44	RGRd54	37236	rh	67.1913757324219	-8.03852462768555	-15.0189046859741	1	house	-0.160442963617417	0	NaN
44	RGRd55	37758	rh	65.1443023681641	-18.6181678771973	-12.2061653137207	1	house	0.010034081463904	0	NaN
44	RGRd56	156537	rh	62.9655075073242	-39.867259979248	-17.2353172302246	1	tool	0.247861696914503	0	NaN
44	RGRd59	34005	rh	37.2408638000488	3.8821234703064	-37.626392364502	1	house	0.0659406462851112	0	NaN
44	RGRd6	154633	rh	48.8772048950195	-51.2214889526367	15.0702819824219	1	face	0.2039850027712	0	0.0232212734618481
44	RGRd60	35855	rh	52.1388168334961	3.40470194816589	-34.5385780334473	1	tool	0.152771964700616	0	NaN
44	RGRd62	34361	rh	50.413932800293	-8.34346580505371	-31.8271865844727	1	house	-0.219198997510145	0	NaN
44	RGRd63	37169	rh	71.7328872680664	-21.1966857910156	-12.7004661560059	1	house	0.118406224462408	0	NaN
44	RGRd64	36775	rh	69.5380859375	-30.8087825775146	-21.1958637237549	1	texture	0.127590939395991	0	NaN
44	RGRd7	195523	rh	65.2181015014648	-44.162914276123	25.1382503509521	1	face	0.0714820487253059	0	0.282718653015442
44	RGRd8	197385	rh	64.2962188720703	-37.9528541564941	4.84510707855225	1	texture	0.201128927692323	0	NaN
44	RGRd9	165880	rh	34.7281799316406	-87.3206253051758	28.2533836364746	4.88579695719681e-06	house	1.93649551937198	0	NaN
44	RTa1	22840	rh	18.4603080749512	-11.3477630615234	-23.7033958435059	1	house	0.581835632490249	0	NaN
44	RTa2	22701	rh	20.7651615142822	-3.38616275787354	-34.9085121154785	1	texture	0.177018955303171	0	NaN
44	RTa3	30611	rh	21.1120796203613	12.7784337997437	-37.9944152832031	1	texture	0.135470452203008	0	NaN
44	RTa4	40352	rh	26.6164245605469	20.3259906768799	-35.9297904968262	1	face	0.105616702963082	0	0.441661667107363
44	RTa5	40637	rh	34.5893287658691	24.240966796875	-31.0611152648926	1	house	0.130730017878337	0	NaN
44	RTa6	34944	rh	39.2126579284668	25.4417133331299	-40.3522720336914	1	house	0.137683892488398	0	NaN
44	RTm1	23536	rh	25.6991996765137	-7.12468099594116	-36.0416603088379	1	tool	0.188856950040728	0	NaN
44	RTm2	32108	rh	40.6789360046387	-5.67107009887695	-49.6379547119141	1	house	0.324200130364745	0	NaN
44	RTm3	33328	rh	44.0979423522949	6.11911773681641	-44.7124900817871	1	house	0.171098935258633	0	NaN
44	RTm4	33785	rh	40.7388381958008	1.77096569538116	-39.5944976806641	1	house	0.0415064195554475	0	NaN
44	RTp1	174417	rh	5.45850515365601	-77.7909851074219	5.82874536514282	1.25601388112261e-18	house	32.5202763024184	1	NaN
44	RTp2	172491	rh	7.9818229675293	-67.9663848876953	4.38884925842285	7.35699770425755e-21	texture	13.7572804913632	1	NaN
44	RTp3	170241	rh	12.3425245285034	-61.9919815063477	-9.18651485443115	2.66118049717203e-12	house	18.0789397814808	1	NaN
44	RTp4	28390	rh	22.9414978027344	-54.7701454162598	-16.3749980926514	3.25966015937156e-10	texture	5.7248727407384	1	NaN
44	RTp5	28883	rh	30.7460956573486	-53.3333053588867	-19.4473857879639	2.9070913053022e-09	house	3.68756649189788	1	NaN
44	RTp6	28547	rh	34.9668884277344	-41.7083473205566	-25.3127002716064	8.621496619278e-12	face	5.69917891500716	1	8.11734504466081e-07
44	RTp7	28366	rh	35.6994895935059	-34.7983512878418	-24.6926765441895	1	tool	0.773363195011505	0	NaN
44	RTp8	32638	rh	61.6711120605469	-24.9709033966064	-30.1884269714355	1	face	-0.0353232947071909	0	0.13723017673454
44	RTx1	30611	rh	21.1120796203613	12.7784337997437	-37.9944152832031	1	texture	0.371334564523302	0	NaN
44	RTx2	30202	rh	26.693790435791	20.5802040100098	-37.4388847351074	1	texture	0.395190288286554	0	NaN
44	RTx3	40637	rh	34.5893287658691	24.240966796875	-31.0611152648926	1	house	0.0630828678846696	0	NaN
44	RTx4	34944	rh	39.2126579284668	25.4417133331299	-40.3522720336914	1	house	0.143145230133005	0	NaN
44	Rp1	101223	rh	32.4285316467285	-41.3746528625488	73.4722442626953	1	house	0.175800394766127	0	NaN
44	Rp2	101782	rh	43.6770324707031	-26.67067527771	58.6688690185547	1	house	0.525045183411902	0	NaN
44	Rp3	102424	rh	50.664249420166	-17.8245506286621	55.2000122070313	1	tool	0.343400498572103	0	NaN
44	Rp4	102567	rh	61.7934036254883	-15.2808418273926	42.1937637329102	1	tool	0.898772164917803	0	NaN
44	Rp5	101714	rh	58.3829154968262	-1.85297286510468	34.1501998901367	5.74133854268685e-06	texture	1.83412179538084	0	NaN
44	Rp6	101467	rh	63.4389266967773	-1.48850131034851	28.3843631744385	1	texture	0.47807003304662	0	NaN
46	LFa1	1352	lh	-1.58283567428589	61.640796661377	-23.7766551971436	1	texture	0.117503606587736	0	NaN
46	LFa2	2517	lh	-5.55996894836426	65.4869842529297	-15.5519695281982	1	texture	0.553517949718451	0	NaN
46	LFa3	3134	lh	-11.4603500366211	64.6532211303711	-10.2462997436523	1	face	0.150338233608369	0	0.232523345198928
46	LFa4	59657	lh	-18.9486312866211	70.2576141357422	-0.207180246710777	1	face	0.392179156544839	0	0.0559121229204867
46	LFa5	59312	lh	-23.7346801757813	66.7700271606445	2.61139130592346	1	face	0.398056459673002	0	0.318207680206106
46	LFa6	58908	lh	-28.3462028503418	58.3988189697266	15.912525177002	0.0936567165642935	house	0.656142338833146	0	NaN
46	LFa7	56958	lh	-34.4543647766113	58.9663162231445	11.4674892425537	1	texture	0.432328627153562	0	NaN
46	LFa8	56111	lh	-42.1364860534668	50.8591346740723	17.8272666931152	1	tool	0.190070957243653	0	NaN
46	LFm1	61916	lh	-15.6730518341064	57.4817962646484	21.315185546875	0.0100795138124239	house	1.05963298151185	0	NaN
46	LFm2	61653	lh	-17.4285087585449	55.8375091552734	22.2400283813477	1	texture	0.241314538134117	0	NaN
46	LFm3	61890	lh	-31.1198463439941	39.3593215942383	38.0699844360352	1	texture	0.65857671435994	0	NaN
46	LFm4	64971	lh	-21.2051811218262	37.5341835021973	39.7737045288086	0.000461110630159686	texture	0.937808813774138	0	NaN
46	LFm5	53523	lh	-32.051570892334	36.0196151733398	41.5446739196777	1	texture	0.211950821780873	0	NaN
46	LFm6	52456	lh	-33.9651565551758	29.6465816497803	47.5251808166504	1	face	-0.136274001387151	0	0.422394495881498
46	LFm7	91596	lh	-37.706844329834	17.5812797546387	53.2024040222168	1	texture	0.674934018013565	0	NaN
46	LFm8	81986	lh	-36.1872940063477	-0.615010559558868	49.0110740661621	1	tool	0.165116034265789	0	NaN
46	LFo1	1067	lh	-9.80867099761963	50.4682235717773	-20.2289180755615	1	texture	1.09216589055516	0	NaN
46	LFo2	2356	lh	-19.3752365112305	41.3197174072266	-23.8654479980469	1	house	0.898296725488144	0	NaN
46	LFo3	5447	lh	-36.8756675720215	30.8059349060059	-18.1610641479492	0.299247991815474	texture	0.9523595948613	0	NaN
46	LFo4	7280	lh	-44.1746940612793	27.5727024078369	-14.7380466461182	1	texture	0.307088393956101	0	NaN
46	LFp1	79424	lh	-17.5366706848145	-39.6606178283691	72.6400604248047	0.00558664623482482	house	1.5712298302126	0	NaN
46	LFp2	77527	lh	-11.1950340270996	-13.4570846557617	75.9742202758789	0.0992777277787932	texture	1.33583136144222	0	NaN
46	LFp3	77075	lh	-13.0899238586426	-9.37565231323242	77.1137237548828	0.0190197714761289	texture	1.39025057731439	0	NaN
46	LFp4	79738	lh	-19.7161026000977	-32.6935958862305	75.2366638183594	0.00151303987315921	texture	1.48789424484636	0	NaN
46	LFp5	79889	lh	-28.144250869751	-28.7027130126953	71.3918304443359	0.639757736389917	tool	1.30112796737117	0	NaN
46	LFp6	82593	lh	-37.3368759155273	-42.0742454528809	65.9459915161133	1	tool	1.29447371207255	0	NaN
46	LGd64	123978	lh	-39.4438552856445	-39.340015411377	55.6577758789063	1	tool	0.933911115074409	0	NaN
46	LTa4	22448	lh	-18.8201808929443	5.28360605239868	-38.3634643554688	0.703490930662848	tool	0.130236603787823	0	NaN
46	LTa5	20901	lh	-21.7935237884521	19.2581520080566	-39.0298461914063	1	texture	-0.0329144000653752	0	NaN
46	LTa6	15224	lh	-25.3916053771973	23.0196323394775	-34.6633796691895	0.652085329538467	house	0.0506546499216377	0	NaN
46	LTm4	24542	lh	-36.5580558776855	-1.5526967048645	-43.8128356933594	1	house	-0.100402078695157	0	NaN
46	LTm5	23770	lh	-30.5328483581543	4.18588495254517	-44.8160247802734	1	house	0.087410669747099	0	NaN
46	LTm6	23071	lh	-29.741153717041	7.55605411529541	-43.2106437683105	1	texture	0.0542278783564529	0	NaN
46	LTo1	158174	lh	-4.52896022796631	-43.0994567871094	11.1902523040771	0.945932839321528	house	1.46292984108623	0	NaN
46	LTo2	37845	lh	-10.6301040649414	-48.2570266723633	-3.43042826652527	1	texture	-0.187259863699967	0	NaN
46	LTo3	33621	lh	-29.6992073059082	-57.6397247314453	-6.97321462631226	3.05367946905912e-09	tool	6.21906086800304	1	NaN
46	LTo4	29660	lh	-31.8278503417969	-55.1594200134277	-18.3946571350098	5.73319661222754e-16	face	4.50068269704449	1	0.256496661557946
46	LTo5	29699	lh	-34.8537864685059	-59.8440971374512	-20.5088329315186	4.91156932609372e-16	face	3.61523871074433	1	0.0726480536485683
46	LTp1	152268	lh	-5.14335346221924	-82.8364791870117	-6.89189672470093	1.79149515103795e-18	texture	17.0107510380065	1	NaN
46	LTp2	151121	lh	-7.42327165603638	-82.9405517578125	-12.9436912536621	8.04800501192146e-19	tool	8.43278514052799	1	NaN
46	LTp3	152241	lh	-20.2469482421875	-80.8248748779297	-13.8947200775146	2.15861457792348e-19	tool	12.5255730563066	1	NaN
46	LTp4	32564	lh	-23.443941116333	-72.5714263916016	-5.21790790557861	1.36513697464184e-16	texture	11.4888434875617	1	NaN
46	LTp5	29891	lh	-34.8834800720215	-63.3001174926758	-17.1682376861572	5.91310537529375e-16	face	6.01708180995426	1	2.15620013099508e-05
46	LTp6	28511	lh	-39.8392143249512	-47.8622665405273	-18.9306373596191	0.00235151112474313	face	0.686880218263982	0	0.0102836671455217
46	LTp7	27948	lh	-47.870849609375	-45.6198387145996	-23.9215393066406	1	tool	0.889864269243995	0	NaN
46	LTp8	26997	lh	-57.101936340332	-38.197826385498	-27.7779197692871	2.95388288088384e-06	texture	1.93930211640411	0	NaN
46	LTx1	23991	lh	-27.0497016906738	0.924324452877045	-48.5819091796875	1	texture	-0.235741805929723	0	NaN
46	LTx2	22580	lh	-22.6447696685791	12.3604145050049	-46.5280723571777	1	texture	-0.1979069797763	0	NaN
46	LTx3	20631	lh	-24.1835060119629	21.5359802246094	-37.9464263916016	1	texture	-0.024066855230916	0	NaN
46	LTx4	15128	lh	-27.3180236816406	23.426586151123	-31.245288848877	1	texture	-0.0946444489761898	0	NaN
46	Lo1	150340	lh	-8.82609748840332	-88.8627624511719	-18.0892467498779	4.24920467819748e-19	texture	21.7141764267534	1	NaN
46	Lo2	164246	lh	-12.3446636199951	-103.278701782227	-15.8018579483032	6.23525027101633e-12	texture	9.91765726192527	1	NaN
46	Lo3	163626	lh	-17.2319431304932	-97.3388824462891	-9.04483127593994	1.35963459938744e-08	texture	7.91398293156555	1	NaN
46	Lo4	162502	lh	-24.7183437347412	-102.999008178711	-3.4878363609314	0.000712922161530003	texture	2.41343502618627	1	NaN
46	Lo5	161268	lh	-30.3907337188721	-99.7427520751953	-5.11005020141602	2.72729103269078e-15	texture	4.55149604859798	1	NaN
46	Lo6	173543	lh	-25.638916015625	-89.6457366943359	-6.37780904769897	2.52730030885533e-17	house	6.1064728614766	1	NaN
46	Lo7	171725	lh	-31.6579322814941	-80.3314514160156	-13.4243383407593	3.81589811383186e-06	texture	2.57116978399019	1	NaN
46	Lo8	173802	lh	-54.2573051452637	-54.2490844726563	-8.91459274291992	1	tool	0.566395819833783	0	NaN
47	LDa1	31972	lh	-14.8357696533203	-7.28990840911865	-23.0243835449219	1	texture	0.800489124375308	0	NaN
47	LDa2	32221	lh	-22.0067100524902	-7.17576742172241	-21.6628093719482	1	house	0.48144952276424	0	NaN
47	LDa3	32344	lh	-23.7598724365234	-7.74468803405762	-23.1089973449707	1	texture	0.452407882331257	0	NaN
47	LDa4	32814	lh	-35.6898651123047	-7.30773735046387	-25.5457553863525	1	texture	0.307480352703202	0	NaN
47	LDa5	33410	lh	-36.4293594360352	-9.07188415527344	-24.0401458740234	1	texture	0.257166573517254	0	NaN
47	LDa6	14862	lh	-39.4412841796875	-2.61936235427856	-13.5311183929443	1	texture	0.273352606749884	0	NaN
47	LDa7	19143	lh	-47.209602355957	2.37557744979858	-24.974292755127	1	texture	0.268814160491104	0	NaN
47	LDa8	19312	lh	-47.730770111084	1.45363283157349	-25.6333789825439	1	texture	0.384518001355045	0	NaN
47	LDh1	33564	lh	-18.063663482666	-16.8492774963379	-21.1132488250732	1	texture	0.362099080024307	0	NaN
47	LDh2	33790	lh	-21.1669826507568	-15.4463443756104	-19.2957286834717	1	texture	0.525158746846896	0	NaN
47	LDh3	34221	lh	-32.9925079345703	-16.3298015594482	-21.3774909973145	1	face	0.398409119039358	0	0.303713143386538
47	LDh4	34749	lh	-36.8053512573242	-16.8308334350586	-19.716588973999	1	texture	0.42625564007316	0	NaN
47	LDh5	35251	lh	-37.8468284606934	-16.114200592041	-17.0888271331787	1	texture	0.292599493930597	0	NaN
47	LDh6	35738	lh	-37.2671432495117	-18.5224723815918	-14.6644687652588	1	texture	0.304586528960433	0	NaN
47	LDh7	16824	lh	-40.5916290283203	-12.3171262741089	-7.82338905334473	1	texture	0.246570850553652	0	NaN
47	LDh8	19617	lh	-47.0538444519043	-3.29994821548462	-17.428596496582	1	texture	0.280041173748023	0	NaN
47	LFa1	2758	lh	-7.87102222442627	65.8963775634766	-17.2870407104492	1	tool	0.242771917356338	0	NaN
47	LFa2	4476	lh	-16.7617816925049	60.1727180480957	-9.67174434661865	1	house	0.233115072189299	0	NaN
47	LFa3	5688	lh	-28.4872398376465	63.7613677978516	-9.2017822265625	1	tool	-0.0428196141560759	0	NaN
47	LFa4	6759	lh	-34.3142280578613	55.0355224609375	-8.34018898010254	1	texture	0.322401006753904	0	NaN
47	LFa5	57566	lh	-35.3156280517578	54.9410285949707	-0.0840181857347488	1	texture	0.570900887951035	0	NaN
47	LFa6	56722	lh	-41.3924102783203	57.3411178588867	9.53963088989258	1	texture	0.292474532193741	0	NaN
47	LFa7	54267	lh	-42.9265403747559	35.1214218139648	9.63058090209961	1	texture	0.602706786469301	0	NaN
47	LFa8	53487	lh	-49.4041709899902	34.3277130126953	13.87575340271	1	texture	0.686807083312397	0	NaN
47	LFm1	66049	lh	-2.93548798561096	46.5861549377441	49.9688529968262	1	house	0.288915529709976	0	NaN
47	LFm2	64990	lh	-12.5842208862305	49.1665573120117	41.7367172241211	1	house	0.696096905763401	0	NaN
47	LFm3	64035	lh	-21.7023048400879	44.964168548584	44.799446105957	1	house	0.144260287204098	0	NaN
47	LFm4	55551	lh	-31.8618946075439	53.1349678039551	25.3359413146973	1	texture	0.104435075878658	0	NaN
47	LFm5	54964	lh	-34.6676406860352	51.1763305664063	28.6034889221191	1	house	0.144877988602789	0	NaN
47	LFm6	52746	lh	-49.2489166259766	38.6246757507324	23.5947761535645	1	house	1.76743099187869	0	NaN
47	LFo1	3556	lh	-24.9535255432129	42.1809692382813	-22.0945224761963	1	texture	0.159798036428091	0	NaN
47	LFo2	3665	lh	-27.4198684692383	37.4012451171875	-19.3656482696533	1	house	0.616116971137231	0	NaN
47	LFo3	7430	lh	-45.2180938720703	26.2734413146973	-15.69553565979	1	tool	0.369185270420704	0	NaN
47	LFo4	7424	lh	-51.0018997192383	19.4735717773438	-11.5086784362793	1	face	0.137673949921042	0	0.459937515876036
47	LFp1	68777	lh	0.102032661437988	18.8575553894043	62.9294815063477	1	house	-0.0165131473094469	0	NaN
47	LFp2	69145	lh	-4.45375490188599	11.3341722488403	71.0248870849609	1	face	0.247279908551782	0	0.334503100572606
47	LFp3	69098	lh	-8.65674781799316	9.58745098114014	71.1854248046875	1	texture	0.178715275823079	0	NaN
47	LFp4	71386	lh	-17.441333770752	10.9852533340454	68.2057723999023	1	texture	0.311085374585476	0	NaN
47	LFp5	70780	lh	-30.422061920166	12.9352178573608	62.2931213378906	1	house	0.181989896920575	0	NaN
47	LFp6	80925	lh	-37.6735305786133	8.47769737243652	58.4617156982422	1	texture	0.234169971365293	0	NaN
47	LGRd1	17093	lh	-40.6503295898438	19.6697940826416	-34.2145233154297	1	house	0.427568932144779	0	NaN
47	LGRd10	18405	lh	-49.9598617553711	12.5241889953613	-26.2251014709473	1	house	0.319797075650767	0	NaN
47	LGRd11	22997	lh	-49.7957611083984	-3.80548667907715	-33.4225387573242	1	texture	0.378223301371509	0	NaN
47	LGRd12	24696	lh	-56.9147872924805	-16.8517990112305	-25.5254364013672	1	texture	0.260006340614312	0	NaN
47	LGRd13	23156	lh	-57.421215057373	-14.4787006378174	-9.88654899597168	1	house	0.137028997745549	0	NaN
47	LGRd14	170408	lh	-59.5320434570313	-18.7365093231201	-3.39733242988586	1	house	0.444872832690918	0	NaN
47	LGRd15	173624	lh	-65.8666076660156	-38.2653961181641	7.46621131896973	1	house	0.452002304151894	0	NaN
47	LGRd16	174541	lh	-63.3144912719727	-39.1349945068359	-1.39306056499481	1	texture	0.807212154293499	0	NaN
47	LGRd17	16006	lh	-39.5310401916504	18.7103595733643	-20.6513767242432	1	house	0.699860318371362	0	NaN
47	LGRd18	17188	lh	-49.5189476013184	22.2047805786133	-18.4186515808105	1	texture	0.499893543029367	0	NaN
47	LGRd19	18363	lh	-58.7339630126953	9.77615451812744	-13.810658454895	1	house	0.399575616696388	0	NaN
47	LGRd2	21336	lh	-43.4649353027344	13.6910209655762	-41.3938140869141	1	tool	0.468586220478951	0	NaN
47	LGRd20	18921	lh	-59.416862487793	3.25801229476929	-10.1570444107056	1	house	0.211712087664236	0	NaN
47	LGRd21	22407	lh	-58.3750762939453	-6.44593191146851	-19.8280010223389	1	texture	0.0160855675957683	0	NaN
47	LGRd22	21909	lh	-52.2683715820313	-10.2810401916504	-17.8976135253906	1	texture	0.273276809288434	0	NaN
47	LGRd23	129970	lh	-67.6597137451172	-21.7654705047607	4.16687965393066	1	texture	0.195283292335525	0	NaN
47	LGRd24	143697	lh	-63.8028793334961	-31.8057746887207	8.96675109863281	1	texture	0.380010974821751	0	NaN
47	LGRd25	6456	lh	-45.3532218933105	23.3888263702393	-14.3012418746948	1	tool	0.461594491747955	0	NaN
47	LGRd26	16879	lh	-48.0200309753418	13.7456340789795	-15.1189842224121	1	texture	0.258001281921808	0	NaN
47	LGRd27	17578	lh	-47.7184906005859	3.96452713012695	-8.85101318359375	1	face	-0.211086054725379	0	0.349261646244217
47	LGRd28	97398	lh	-59.4792556762695	3.40886425971985	0.574337780475616	1	texture	0.150813670972794	0	NaN
47	LGRd29	19132	lh	-56.4376754760742	-5.04300022125244	-1.08572661876678	1	tool	0.0709048177019882	0	NaN
47	LGRd3	21869	lh	-46.0854682922363	9.38524150848389	-36.6260299682617	1	house	0.349085607590074	0	NaN
47	LGRd30	138881	lh	-54.8612823486328	-11.3890762329102	7.45602321624756	1	texture	0.505756530747052	0	NaN
47	LGRd31	138810	lh	-56.444694519043	-18.7368507385254	6.5749044418335	1	face	0.182236519976727	0	0.430341458877977
47	LGRd32	132592	lh	-57.9953727722168	-26.3757171630859	11.154712677002	1	house	0.238261755226393	0	NaN
47	LGRd33	55018	lh	-53.4880867004395	42.0990333557129	8.17899608612061	1	texture	0.269086923039144	0	NaN
47	LGRd34	53279	lh	-47.0923233032227	22.384183883667	-3.2642502784729	1	house	0.527593102554641	0	NaN
47	LGRd35	98622	lh	-58.4395904541016	4.95277786254883	18.6326065063477	1	house	0.113861032568502	0	NaN
47	LGRd36	96281	lh	-53.2535705566406	3.27507972717285	14.328179359436	1	house	0.218564335215291	0	NaN
47	LGRd37	94049	lh	-53.530158996582	-3.06565070152283	16.7673854827881	1	face	-0.0200043762926648	0	0.498726978040032
47	LGRd38	92799	lh	-55.5626373291016	-5.35233926773071	19.2571868896484	1	house	0.342770701095515	0	NaN
47	LGRd39	90127	lh	-58.0427932739258	-19.7974243164063	8.73488521575928	1	texture	0.226741297514864	0	NaN
47	LGRd4	24991	lh	-49.8759880065918	-14.3364315032959	-29.0774898529053	1	house	0.420962326498061	0	NaN
47	LGRd40	129497	lh	-56.6658401489258	-24.4789371490479	24.2175598144531	1	texture	0.210382760041297	0	NaN
47	LGRd41	53370	lh	-47.9794006347656	32.8649291992188	14.3420085906982	1	texture	0.401514051228336	0	NaN
47	LGRd42	99742	lh	-54.6938247680664	18.922399520874	12.7974433898926	1	face	0.278705733025462	0	0.267526191881086
47	LGRd43	98093	lh	-45.720100402832	18.0391254425049	29.5747680664063	1	house	-0.0886865078218683	0	NaN
47	LGRd44	97788	lh	-52.4649314880371	4.47745513916016	24.2554588317871	1	house	0.549217506726149	0	NaN
47	LGRd45	92882	lh	-48.1905288696289	6.91521835327148	26.2559795379639	1	face	0.433288063146993	0	0.259314629680776
47	LGRd46	90581	lh	-54.9426040649414	12.0560674667358	33.144100189209	1	tool	0.304030215077108	0	NaN
47	LGRd47	89523	lh	-63.7153739929199	-14.4055118560791	34.5680503845215	1	texture	0.215680270031619	0	NaN
47	LGRd48	88654	lh	-57.3666954040527	-9.67715835571289	46.2590560913086	1	texture	0.63762807195641	0	NaN
47	LGRd49	53228	lh	-47.5268020629883	38.6197738647461	19.277307510376	1	face	0.196792468579525	0	0.340628975778802
47	LGRd5	25969	lh	-53.6188659667969	-23.9162425994873	-22.3069305419922	1	tool	0.274612759451411	0	NaN
47	LGRd50	52504	lh	-47.2785186767578	36.9005851745605	22.5611324310303	1	texture	0.61804946067034	0	NaN
47	LGRd51	51219	lh	-42.826488494873	26.5999221801758	27.6506252288818	1	tool	0.653090133419617	0	NaN
47	LGRd52	50665	lh	-48.5239944458008	17.83962059021	32.7028656005859	1	tool	0.126033825860148	0	NaN
47	LGRd53	85056	lh	-44.1058044433594	4.58595895767212	48.436653137207	1	tool	0.530398355777252	0	NaN
47	LGRd54	83341	lh	-41.8369216918945	-0.467660486698151	47.4324607849121	1	house	0.464787377081305	0	NaN
47	LGRd55	84771	lh	-53.6871109008789	-4.44836759567261	48.6269836425781	1	house	0.553980518418951	0	NaN
47	LGRd56	87603	lh	-48.0473022460938	-12.4514837265015	53.0974540710449	1	texture	0.322996583941527	0	NaN
47	LGRd57	53904	lh	-37.3324432373047	43.5993118286133	24.2678127288818	1	face	0.00670389329898739	0	0.400722344381869
47	LGRd58	54004	lh	-40.4536972045898	42.7843780517578	31.672248840332	1	face	0.0385544161689097	0	0.371863743415574
47	LGRd59	52959	lh	-46.9985466003418	26.8721694946289	40.2853889465332	1	texture	0.338736766943848	0	NaN
47	LGRd6	26085	lh	-61.3333740234375	-25.1634426116943	-11.5033664703369	1	house	0.249475726637102	0	NaN
47	LGRd60	93652	lh	-45.0805969238281	12.2763671875	46.8020896911621	1	texture	0.252123925655742	0	NaN
47	LGRd61	83324	lh	-40.0587921142578	-1.4734935760498	43.4806518554688	1	house	0.305976208026398	0	NaN
47	LGRd62	82268	lh	-34.6090087890625	0.892326831817627	59.4097709655762	1	face	0.265400857604321	0	0.298713759432189
47	LGRd63	82026	lh	-42.2741355895996	-9.17000102996826	61.9558143615723	1	texture	0.17252990965883	0	NaN
47	LGRd64	86169	lh	-47.4041748046875	-19.5140037536621	58.3477935791016	1	house	0.441467549002801	0	NaN
47	LGRd7	170391	lh	-66.9467163085938	-29.9969825744629	-13.2805004119873	1	texture	0.409037962719939	0	NaN
47	LGRd8	174429	lh	-67.2489624023438	-46.8620223999023	-17.3095321655273	1	texture	0.0460407636049683	0	NaN
47	LGRd9	16860	lh	-43.2755737304688	20.9832534790039	-30.2308082580566	1	texture	0.320445251664837	0	NaN
47	LOa1	195580	lh	-7.55512952804565	-54.7443351745605	21.0195064544678	1	texture	0.150660687089272	0	NaN
47	LOa2	156308	lh	-4.00424528121948	-59.4991149902344	3.14742302894592	1	tool	0.156383194503768	0	NaN
47	LOa3	156985	lh	-10.290340423584	-53.6175880432129	-3.23032641410828	1	house	0.521238305104647	0	NaN
47	LOa4	37407	lh	-16.1323089599609	-45.9134674072266	-11.3811521530151	2.19835905065735e-05	texture	1.59725050458603	0	NaN
47	LOa5	29243	lh	-27.1480255126953	-45.1569290161133	-20.2510299682617	3.61123214774274e-10	tool	3.40435030961169	1	NaN
47	LOa6	29019	lh	-28.8947372436523	-40.4390487670898	-24.03000831604	7.93504368285781e-06	face	2.60737189203909	1	2.42028810207124e-08
47	LOa7	27881	lh	-47.3701095581055	-45.0513801574707	-24.8818588256836	1	texture	0.181806320884279	0	NaN
47	LOa8	27229	lh	-52.6195068359375	-35.0142936706543	-30.0563545227051	1	house	0.623043194590422	0	NaN
47	LOp1	162798	lh	-39.3736801147461	-84.8955917358398	26.5311336517334	8.34325500976208e-08	house	2.52088644172045	1	NaN
47	LOp2	159867	lh	-36.6113739013672	-68.1580123901367	23.2106399536133	1	house	0.204881960944675	0	NaN
47	LOp3	178787	lh	-41.0785064697266	-66.0872421264648	20.1428642272949	1	texture	0.395400113654962	0	NaN
47	LOp4	146077	lh	-65.8021240234375	-46.1463088989258	20.887809753418	1	house	0.551015745065829	0	NaN
47	LOp5	146092	lh	-57.9408302307129	-41.3702659606934	17.4444999694824	1	house	0.516335862037781	0	NaN
47	LOp6	149316	lh	-63.9459915161133	-29.3291568756104	15.4978551864624	1	tool	0.267440211358396	0	NaN
47	LTa1	1024	lh	-12.8057250976563	15.2334909439087	-24.8813915252686	1	texture	-0.093309081056882	0	NaN
47	LTa2	20615	lh	-20.127571105957	11.4379425048828	-32.3696746826172	1	house	-0.283591496314733	0	NaN
47	LTa3	20765	lh	-21.9100399017334	19.8600540161133	-38.2982139587402	1	house	-0.0611027200198661	0	NaN
47	LTa4	10217	lh	-35.6762313842773	25.8829479217529	-37.6648979187012	1	texture	0.374935363754611	0	NaN
47	LTa5	10232	lh	-44.4805526733398	19.7154388427734	-35.6221199035645	1	texture	0.439003719076032	0	NaN
47	LTa6	21078	lh	-52.6690940856934	15.0888824462891	-33.932502746582	1	texture	0.488335468701063	0	NaN
47	LTo1	171953	lh	-28.4263877868652	-86.1893310546875	-16.2182102203369	9.52889653945176e-08	house	5.67118457838199	1	NaN
47	LTo2	20289	lh	-30.2239418029785	-60.6701202392578	-19.092887878418	0.0227272366271533	texture	3.54960885584758	1	NaN
47	LTo3	29380	lh	-38.1099090576172	-52.4391403198242	-24.0671920776367	1.42434815748821e-08	face	5.72875948385421	1	1.99531130149195e-09
47	LTo4	27953	lh	-47.2704849243164	-49.3221588134766	-28.3394336700439	1	face	0.49497539378674	0	0.319382829826418
47	LTo5	27878	lh	-47.495719909668	-42.1909027099609	-22.8861694335938	1	tool	0.677982207045502	0	NaN
47	LTo6	27145	lh	-51.0218544006348	-28.3299407958984	-28.9116020202637	1	texture	0.363158790820608	0	NaN
47	LTx1	31051	lh	-16.5997276306152	-6.79125118255615	-30.2804279327393	1	face	0.280818292177398	0	0.397485713656565
47	LTx2	22318	lh	-17.7155857086182	4.10020446777344	-34.1331024169922	1	face	0.182753955372917	0	0.248572041236105
47	LTx3	20616	lh	-20.0234432220459	12.3109922409058	-32.6398048400879	1	face	-0.109326189542087	0	0.284333270633923
47	LTx4	14509	lh	-27.6877746582031	18.4962921142578	-29.6834297180176	1	house	-0.153681943546692	0	NaN
47	Lo1	35967	lh	-15.0676288604736	-28.7375907897949	-12.4245738983154	1	house	0.553471552233242	0	NaN
47	Lo2	30558	lh	-17.9984588623047	-40.9611549377441	-16.2076778411865	1	texture	0.0839996302073574	0	NaN
47	Lo3	29159	lh	-30.7102699279785	-44.479377746582	-22.5373840332031	6.26656027336658e-08	face	2.6392185563047	1	0.000142831697749269
47	Lo4	27894	lh	-56.5894393920898	-48.5593948364258	-27.2246074676514	1	texture	0.283932133503363	0	NaN
47	Lo5	20385	lh	-59.2621994018555	-47.5147247314453	-21.0100288391113	1	house	0.124870610358842	0	NaN
47	Lo6	170632	lh	-67.6118621826172	-45.153190612793	-23.109468460083	1	texture	0.372194985251334	0	NaN
47	Lo7	172017	lh	-63.5353012084961	-42.9921760559082	-15.6550149917603	1	house	0.300543496438647	0	NaN
47	Lo8	174430	lh	-68.9402847290039	-46.5200958251953	-16.8113231658936	1	house	0.375912429574841	0	NaN
50	RDa10	35012	rh	53.7241287231445	-27.5450115203857	-19.0824127197266	1	house	0.562376623739652	0	NaN
50	RDa2	21436	rh	26.4835548400879	-2.58575081825256	-24.2856788635254	1	face	0.0427426726642364	0	0.428219595004153
50	RDa3	21306	rh	29.0053749084473	-4.29695796966553	-23.8237609863281	1	house	-0.0573575304351615	0	NaN
50	RDa8	16865	rh	36.2020645141602	-21.0807781219482	-17.1375045776367	1	house	0.0876025718248757	0	NaN
50	RDa9	28235	rh	42.5532913208008	-28.9174041748047	-20.6489772796631	1	house	0.258944510281733	0	NaN
50	RDh1	45818	lh	-5.09285831451416	12.9193925857544	-23.4496574401855	1	house	0.137115288770739	0	NaN
50	RDh2	13566	rh	7.18248558044434	7.26148223876953	-13.8108930587769	1	house	0.0682457966671465	0	NaN
50	RDh3	13682	rh	7.21743154525757	7.34918260574341	-13.4334449768066	1	house	-0.0304693755444843	0	NaN
50	RDh4	14565	rh	8.24516868591309	1.67059600353241	-12.0486326217651	1	house	0.0341048819428043	0	NaN
50	RDh5	14769	rh	9.34056854248047	-0.463062584400177	-15.2104873657227	1	house	0.00327175871543851	0	NaN
50	RDp1	18134	rh	9.73373126983643	-21.3639507293701	-9.68519878387451	1	house	-0.0638675182652001	0	NaN
50	RDp2	23262	rh	18.8979110717773	-32.2971954345703	-6.79258918762207	1	house	0.606497844370542	0	NaN
50	RDp6	19474	rh	33.0961494445801	-37.3210983276367	-6.5863094329834	1	house	0.105502807775988	0	NaN
50	RDp7	27385	rh	29.135913848877	-49.3539009094238	-9.72678756713867	1	house	0.0788566929388795	0	NaN
50	RDp8	20286	rh	38.9939727783203	-54.2025604248047	-16.432544708252	1	house	0.137473895332372	0	NaN
50	RGRD1	42481	rh	45.9140968322754	12.734393119812	-19.4846267700195	1	texture	-0.169765684018532	0	NaN
50	RGRD10	35456	rh	43.322021484375	15.6887083053589	-45.9596481323242	1	tool	0.393374857440151	0	NaN
50	RGRD11	36391	rh	57.3106803894043	12.2451152801514	-34.8580856323242	1	tool	-0.118450296172361	0	NaN
50	RGRD12	37058	rh	56.0986175537109	13.8785877227783	-24.7009181976318	1	house	0.153865503887815	0	NaN
50	RGRD13	33922	rh	56.0386581420898	-5.58444833755493	-33.4104804992676	1	house	0.0490685948128382	0	NaN
50	RGRD14	36514	rh	66.4829483032227	-24.5264053344727	-23.1094398498535	1	tool	0.181522363835888	0	NaN
50	RGRD15	36691	rh	68.8768997192383	-30.0766696929932	-22.2315692901611	1	tool	0.171572856557902	0	NaN
50	RGRD18	34434	rh	36.580810546875	13.2411556243896	-38.1223373413086	1	house	0.0821423112768298	0	NaN
50	RGRD19	34336	rh	38.630012512207	3.25585842132568	-37.3490409851074	1	house	0.347359500229055	0	NaN
50	RGRD2	41075	rh	51.9452934265137	23.6849231719971	-21.9878692626953	1	texture	-0.0193547470733723	0	NaN
50	RGRD21	32991	rh	52.9315910339355	-11.7863159179688	-40.813362121582	1	house	0.0673272343539826	0	NaN
50	RGRD22	33475	rh	67.7223434448242	-22.6658020019531	-28.747486114502	1	tool	0.153545091964528	0	NaN
50	RGRD23	34497	rh	54.9687271118164	-40.2428588867188	-20.9258079528809	1	texture	0.35732087401371	0	NaN
50	RGRD24	34287	rh	53.5364265441895	-50.2433166503906	-27.0270118713379	1	house	0.165513599967816	0	NaN
50	RGRD25	34312	rh	34.7066688537598	24.2139282226563	-38.3567352294922	1	house	-0.07556836898863	0	NaN
50	RGRD26	33549	rh	36.0062675476074	5.15210342407227	-39.8251037597656	1	face	-0.217669415921159	0	0.302409444158687
50	RGRD27	33672	rh	41.5378074645996	2.23229241371155	-40.5216255187988	1	face	0.0256328828724325	0	0.263767015434483
50	RGRD28	32490	rh	46.2157669067383	-6.13644075393677	-45.8133277893066	1	face	0.390954829503462	0	0.395484557547583
50	RGRD2_1	63588	rh	39.5053825378418	35.6870803833008	24.3528289794922	1	face	0.00939426999527099	0	0.47149113037648
50	RGRD2_10	68184	rh	51.2467155456543	3.5633373260498	16.8839015960693	1	house	0.133811480434787	0	NaN
50	RGRD2_11	69166	rh	60.1631507873535	10.4915027618408	28.4476318359375	1	house	-0.0544333419174476	0	NaN
50	RGRD2_12	188968	rh	67.2154998779297	-9.43330860137939	22.5442867279053	1	face	-0.137540111935221	0	0.459418356700752
50	RGRD2_13	188447	rh	65.1601409912109	-13.9607992172241	9.11296463012695	1	house	0.0701178006590724	0	NaN
50	RGRD2_14	196288	rh	60.3120384216309	-36.8168792724609	20.4940547943115	0.966208214593987	house	0.615648873226118	0	NaN
50	RGRD2_15	196413	rh	68.1944122314453	-42.2886657714844	13.28307056427	1	house	0.365643288622271	0	NaN
50	RGRD2_16	194272	rh	49.6580123901367	-45.9737777709961	21.9618072509766	1	face	0.220872636942264	0	0.438148275245626
50	RGRD2_17	64191	rh	56.7676391601563	22.9446392059326	19.210657119751	1	house	-0.108599696910392	0	NaN
50	RGRD2_18	186944	rh	58.3339691162109	6.80649566650391	6.58679389953613	1	house	-0.071631544521648	0	NaN
50	RGRD2_19	186817	rh	63.5038871765137	8.91733551025391	1.63910567760468	1	house	-0.00823362311735243	0	NaN
50	RGRD2_20	188272	rh	65.7613525390625	1.49087202548981	14.44264793396	1	house	0.42732207285956	0	NaN
50	RGRD2_21	41141	rh	68.0600433349609	-7.30175256729126	-6.02402114868164	1	tool	0.2542956787131	0	NaN
50	RGRD2_22	179898	rh	60.1031455993652	-11.4176559448242	5.5400972366333	1	house	0.641770882869433	0	NaN
50	RGRD2_23	197663	rh	57.7417602539063	-30.5629615783691	13.5044631958008	1	house	0.829338119948389	0	NaN
50	RGRD2_24	154120	rh	47.4702301025391	-54.0750885009766	12.5088005065918	1	face	0.467048583152098	0	0.354038840373699
50	RGRD2_25	61818	rh	60.948802947998	30.7025547027588	5.0927619934082	1	house	-0.132277779082801	0	NaN
50	RGRD2_26	184036	rh	60.177360534668	15.9479856491089	30.423397064209	1	house	-0.0733589726485709	0	NaN
50	RGRD2_27	41236	rh	63.6463088989258	9.34084510803223	-5.36999464035034	1	face	-0.0584767212857021	0	0.491608507879589
50	RGRD2_28	40851	rh	67.1176910400391	-1.78634262084961	2.63450241088867	1	house	0.425424037079897	0	NaN
50	RGRD2_29	39988	rh	64.5778961181641	-16.0446109771729	-11.5850486755371	1	house	0.262368825377479	0	NaN
50	RGRD2_30	198777	rh	69.1370849609375	-13.3700180053711	8.06345558166504	1	house	0.715739173014618	0	NaN
50	RGRD2_31	198219	rh	65.3469619750977	-29.3897304534912	-2.93879318237305	0.84357453351397	face	0.780146948273266	0	0.40497829726598
50	RGRD2_32	156478	rh	60.1478843688965	-34.9041938781738	-7.07070922851563	1	house	0.86385436573984	0	NaN
50	RGRD2_9	63008	rh	42.0428085327148	39.0967712402344	21.8726539611816	1	house	-0.135563884389203	0	NaN
50	RGRD3	37503	rh	48.5892295837402	9.45982074737549	-26.9670104980469	1	house	-0.121729164098915	0	NaN
50	RGRD30	32387	rh	57.9558906555176	-22.816822052002	-32.302906036377	1	house	0.384479681202883	0	NaN
50	RGRD31	32892	rh	62.2741088867188	-36.8460464477539	-29.0364627838135	1	texture	0.449981344001405	0	NaN
50	RGRD32	33499	rh	48.435661315918	-48.4766578674316	-27.6789226531982	1	house	0.620172766556391	0	NaN
50	RGRD33	172218	rh	22.0174541473389	-86.7523345947266	-14.7409143447876	0.223371464264849	texture	1.4474048042119	0	NaN
50	RGRD34	171361	rh	26.572624206543	-83.7646560668945	-8.20965480804443	0.02816007799723	texture	1.09897073410021	0	NaN
50	RGRD35	170438	rh	34.744010925293	-80.4771575927734	-17.5052604675293	1	texture	0.477659531482886	0	NaN
50	RGRD36	160840	rh	41.9725608825684	-75.132568359375	-17.9645462036133	1	house	0.274630488849517	0	NaN
50	RGRD37	149755	rh	42.601634979248	-69.5088500976563	-18.8034019470215	1	face	0.156521716206936	0	0.189619118842811
50	RGRD39	152438	rh	40.858757019043	-56.5850372314453	9.34127140045166	1	house	0.0593259277152612	0	NaN
50	RGRD4	37790	rh	49.3866119384766	7.16440200805664	-24.8413925170898	1	house	0.201687054871055	0	NaN
50	RGRD41	173985	rh	16.1601810455322	-89.0553131103516	-6.43066453933716	1.09165276180437e-10	texture	4.05365366554118	1	NaN
50	RGRD42	173127	rh	18.2347831726074	-90.3858032226563	-12.7818021774292	1	texture	2.30065615802359	0	NaN
50	RGRD43	171960	rh	29.3815116882324	-90.973518371582	-12.2958583831787	1	texture	0.650717473632607	0	NaN
50	RGRD48	168860	rh	54.0983657836914	-60.5339279174805	25.8762035369873	1	house	0.228860484780278	0	NaN
50	RGRD49	174682	rh	10.7595252990723	-90.1856842041016	-13.9797191619873	7.46888812537106e-13	texture	4.83406219994056	1	NaN
50	RGRD5	36666	rh	64.8507080078125	-2.73268365859985	-25.9173698425293	1	house	0.365592311168984	0	NaN
50	RGRD50	173651	rh	34.1774787902832	-91.8595275878906	-10.7034454345703	1	texture	0.631090423347433	0	NaN
50	RGRD51	172192	rh	32.7024536132813	-92.1830139160156	-16.2541656494141	1	texture	0.180602163327891	0	NaN
50	RGRD52	160730	rh	39.6496505737305	-86.4088592529297	-14.3194103240967	1	texture	0.131724840385378	0	NaN
50	RGRD53	164932	rh	45.390567779541	-71.0534820556641	1.82987773418427	1	house	0.205473633298214	0	NaN
50	RGRD54	166255	rh	41.0436058044434	-69.440315246582	13.8315925598145	1	house	-0.109907258810081	0	NaN
50	RGRD57	176440	rh	19.8774108886719	-104.481842041016	-7.61479902267456	1.37709186174842e-07	texture	9.13473128614803	1	NaN
50	RGRD58	174563	rh	25.9479217529297	-90.0472030639648	-18.12890625	0.049454514657576	texture	1.55641965950614	0	NaN
50	RGRD59	160480	rh	36.1804351806641	-96.5161514282227	-9.59982204437256	1	texture	0.293095011945542	0	NaN
50	RGRD6	37091	rh	71.5716171264648	-21.967601776123	-13.8915872573853	1	tool	0.335045415234101	0	NaN
50	RGRD60	161895	rh	39.4393577575684	-91.0417709350586	-0.0577809661626816	1	texture	0.408740976779059	0	NaN
50	RGRD61	164849	rh	47.4836769104004	-80.7953720092773	5.30679845809937	1	house	0.202525429594658	0	NaN
50	RGRD62	165323	rh	42.1470260620117	-86.7198181152344	6.40195894241333	1	house	0.365046880983162	0	NaN
50	RGRD63	166141	rh	40.1119155883789	-78.5104370117188	21.5361614227295	1	house	0.390275159488946	0	NaN
50	RGRD64	113525	rh	41.2786407470703	-59.9227638244629	42.5561752319336	1	house	0.495017456177324	0	NaN
50	RGRD9	41066	rh	44.0265808105469	26.2760429382324	-23.605110168457	1	tool	-0.1240559422712	0	NaN
50	RTm1	22073	rh	19.2630195617676	-0.0916058793663979	-33.2787628173828	1	face	-0.08345893267103	0	0.187347011826795
50	RTm5	32647	rh	60.563591003418	-34.8225402832031	-29.8231163024902	1	house	0.0481056959571881	0	NaN
50	RTm6	33729	rh	50.8164176940918	-49.7505645751953	-27.6598701477051	1	house	0.0245527131134508	0	NaN
50	RTp4	32656	rh	51.0811767578125	-41.4705429077148	-31.8615627288818	1	texture	0.0795710430558561	0	NaN
50	RTp5	33961	rh	47.4982566833496	-55.0376434326172	-25.7600193023682	1	house	0.126028315713257	0	NaN
50	RTp6	153513	rh	61.7041397094727	-58.4579887390137	-15.7996320724487	1	house	-0.0916818893617284	0	NaN
50	RTx1	31166	rh	20.4326457977295	7.44301509857178	-43.8306083679199	1	house	-0.13018186587492	0	NaN
50	RTx2	33755	rh	30.5779247283936	24.6404819488525	-35.5017738342285	1	house	-0.00384544251060111	0	NaN
50	RTx3	40366	rh	36.9337921142578	25.5894012451172	-35.597827911377	1	house	-0.0344784712673981	0	NaN
50	RTx4	41192	rh	40.7810134887695	25.9981288909912	-29.8778839111328	1	house	-0.0894031138605578	0	NaN
50	RTx5	41853	rh	45.4536247253418	20.1694679260254	-20.7929229736328	1	house	-0.172883709632112	0	NaN
50	RTx6	41732	rh	50.080265045166	21.1621475219727	-18.7474803924561	1	house	-0.144758543426892	0	NaN
50	Ro1	139873	rh	26.9052448272705	-84.6106491088867	40.8026657104492	1	face	-0.0880119253929279	0	0.411775314718814
50	Ro2	120526	rh	19.8057842254639	-76.4324188232422	55.9620056152344	1	texture	0.167824326106633	0	NaN
50	Ro3	119890	rh	29.9806938171387	-78.0060958862305	51.3781433105469	1	house	0.438303123189252	0	NaN
50	Ro4	115764	rh	23.3139057159424	-59.1492538452148	51.9503402709961	1	face	0.0334181891785059	0	0.47819138482589
50	Ro5	109329	rh	39.9088821411133	-49.8956985473633	47.0951843261719	1	house	0.459328743144982	0	NaN
50	Ro6	109441	rh	43.3734893798828	-47.9059600830078	49.5697288513184	1	house	0.530007094372975	0	NaN
54	LDa1	32091	lh	-23.5378513336182	-6.03356075286865	-23.4680461883545	1	house	1.17063584386343	0	NaN
54	LDa2	31960	lh	-25.2033996582031	-5.23870372772217	-24.631275177002	1	house	0.349981600309585	0	NaN
54	LDa3	41811	lh	-26.7433586120605	-4.00510931015015	-23.4149780273438	1	tool	0.419439570571372	0	NaN
54	LDa4	41295	lh	-31.6561470031738	-5.15941476821899	-22.5963611602783	1	tool	0.583039970336588	0	NaN
54	LDa5	33526	lh	-36.5574073791504	-9.3747091293335	-23.739330291748	1	house	0.0812976362745937	0	NaN
54	LDa6	33527	lh	-36.5150375366211	-9.65036582946777	-23.9066162109375	1	house	-0.0719434773869533	0	NaN
54	LDa7	15269	lh	-39.4686851501465	-4.03343725204468	-12.5716161727905	1	texture	-0.112254522181542	0	NaN
54	LDa8	20706	lh	-48.7663345336914	-8.76540279388428	-17.6002502441406	1	tool	-0.15983958586544	0	NaN
54	LDh10	26342	lh	-50.0058975219727	-26.9462795257568	-15.3280696868896	1	face	-0.24861494409754	0	0.446214121969245
54	LDh3	34543	lh	-34.3816375732422	-16.8498229980469	-20.1598320007324	1	house	1.59887568409195	0	NaN
54	LDh4	34746	lh	-37.1813507080078	-16.681188583374	-20.219934463501	1	texture	0.436199882490028	0	NaN
54	LDh5	35550	lh	-38.2083053588867	-19.0164585113525	-16.0319004058838	1	face	-0.0666012640515025	0	0.421181840742451
54	LDh6	35646	lh	-38.1025238037109	-19.3942680358887	-15.4904489517212	1	texture	-0.107713842940739	0	NaN
54	LDh7	21531	lh	-49.9029808044434	-16.7668323516846	-11.31911277771	1	tool	-0.307586986289686	0	NaN
54	LDh8	24896	lh	-48.6024513244629	-13.0850458145142	-25.7221202850342	1	tool	-0.319081752119849	0	NaN
54	LDh9	24905	lh	-56.5321235656738	-19.7571983337402	-24.1485652923584	1	tool	-0.335984106893329	0	NaN
54	LOp1	156398	lh	-11.8197288513184	-63.4191589355469	3.56198811531067	5.66003791365442e-11	texture	1.31725694182901	0	NaN
54	LOp10	176319	lh	-41.6200523376465	-62.4352951049805	0.314379781484604	1	face	-0.148629815666443	0	0.452515494233936
54	LOp2	157143	lh	-16.2407855987549	-55.8419914245605	3.73765635490417	1	texture	0.835367716149686	0	NaN
54	LOp3	157484	lh	-19.894287109375	-53.8827133178711	0.16510184109211	1.14243749853541e-09	texture	4.12063294197927	1	NaN
54	LOp4	36089	lh	-20.0978374481201	-49.4684791564941	-8.14456939697266	2.63976539346153e-20	house	6.81904531344484	1	NaN
54	LOp5	35811	lh	-24.5516471862793	-47.8083343505859	-9.80695915222168	4.95014481322152e-16	house	2.86626445165504	1	NaN
54	LOp6	35225	lh	-28.8089065551758	-47.2247200012207	-8.02172470092773	0.104045440481157	texture	0.728403073886293	0	NaN
54	LOp7	20452	lh	-23.0541114807129	-77.8696594238281	-11.6113386154175	1	face	0.15945142563706	0	0.422194863544226
54	LOp8	176615	lh	-41.9138984680176	-64.4750518798828	3.4269814491272	1	texture	0.102299172821801	0	NaN
54	LOp9	176469	lh	-41.8613967895508	-62.8538017272949	2.23787069320679	1	texture	-0.226167869356691	0	NaN
54	LOs1	190588	lh	-8.69685935974121	-62.6881637573242	39.0284996032715	1	house	0.171239078127033	0	NaN
54	LOs10	140733	lh	-42.6582260131836	-55.3218574523926	12.5590496063232	1	tool	0.689803963331487	0	NaN
54	LOs2	191701	lh	-9.73046779632568	-59.4698829650879	36.748104095459	1	house	-0.0590222136664214	0	NaN
54	LOs3	192029	lh	-9.63557815551758	-65.6657943725586	26.2917098999023	1	house	0.0105966346325309	0	NaN
54	LOs4	149626	lh	-14.0216293334961	-65.4604339599609	27.349681854248	1	house	0.176957618025958	0	NaN
54	LOs5	152472	lh	-14.9224987030029	-64.9694213867188	30.2746295928955	1	tool	0.249734430696311	0	NaN
54	LOs6	155138	lh	-15.404275894165	-56.1510391235352	19.6287479400635	1	face	0.371142859680192	0	0.392328663889717
54	LOs7	141752	lh	-40.2165565490723	-56.3785095214844	23.3051052093506	0.00665513835302722	texture	0.819471949092081	0	NaN
54	LOs8	141628	lh	-40.066837310791	-56.1443862915039	21.9417858123779	1	house	0.198677639396078	0	NaN
54	LOs9	141254	lh	-41.2630615234375	-54.7511367797852	15.9337368011475	1	tool	0.556475018435104	0	NaN
54	LPi1	35645	lh	-37.9926872253418	-18.9906845092773	-15.3645944595337	1	texture	-0.192341656944298	0	NaN
54	LPi2	35741	lh	-37.9987182617188	-19.7637920379639	-14.9377632141113	1	tool	-0.167125707948027	0	NaN
54	LPi3	34676	lh	-17.5481719970703	-23.3814430236816	-17.3354434967041	1	tool	-0.112839685284023	0	NaN
54	LPi4	34571	lh	-16.8113880157471	-24.3804531097412	-18.5307178497314	1	tool	-0.0837123611134342	0	NaN
54	LPi5	34358	lh	-16.8342361450195	-26.5909385681152	-20.7596321105957	1	house	0.0303050374781786	0	NaN
54	LPi6	34358	lh	-16.8342361450195	-26.5909385681152	-20.7596321105957	1	house	-0.0244437148476523	0	NaN
54	LPi7	140514	lh	-48.0371246337891	-35.4377822875977	2.99086308479309	1	tool	-0.15904992030724	0	NaN
54	LPi8	140776	lh	-50.2577133178711	-38.1329956054688	5.05149173736572	1	house	-0.160196988317196	0	NaN
54	LPi9	140907	lh	-51.6263236999512	-38.952392578125	5.41797780990601	1	tool	-0.111111441280496	0	NaN
54	LPm10	35717	lh	-25.3975143432617	-48.8231430053711	-9.53130626678467	1.77677161639774e-20	house	9.42701678532191	1	NaN
54	LPm11	35816	lh	-21.7714900970459	-51.1409530639648	-11.945273399353	5.95068996906619e-17	house	6.16422424064426	1	NaN
54	LPm12	36006	lh	-17.8238563537598	-55.272590637207	-12.3338680267334	9.75759178941841e-15	house	5.03819503570231	1	NaN
54	LPm2	35077	lh	-30.0455017089844	-21.5994472503662	-16.6053562164307	1	house	0.73555036333766	0	NaN
54	LPm3	36831	lh	-29.0429267883301	-31.4862785339355	-8.69824123382568	1	house	0.309589198598995	0	NaN
54	LPm4	37236	lh	-21.4459419250488	-33.0815200805664	-7.90961599349976	1	house	0.313168708485287	0	NaN
54	LPm5	38564	lh	-30.9329090118408	-36.168285369873	-2.0703821182251	1	house	1.01967701843223	0	NaN
54	LPm6	38593	lh	-8.96764755249023	-40.2416763305664	-1.3010835647583	1	house	1.24647684817825	0	NaN
54	LPm7	36167	lh	-24.0487213134766	-43.4720573425293	-7.67923450469971	0.126575918167633	house	3.58340732571165	0	NaN
54	LPm8	36350	lh	-22.4828701019287	-47.4322128295898	-6.22165012359619	1.64070078901757e-05	house	2.27039779519167	1	NaN
54	LPm9	36351	lh	-21.9551849365234	-48.1684417724609	-6.39898443222046	3.64604180392198e-14	house	4.11091211585981	1	NaN
54	LPs1	142130	lh	-43.9264450073242	-57.2175445556641	20.9791488647461	1	tool	0.278647372283789	0	NaN
54	LPs10	164376	lh	-14.4045906066895	-106.265632629395	2.01106238365173	1.3686217614848e-14	texture	9.020295375239	1	NaN
54	LPs2	141754	lh	-40.4570465087891	-56.0059509277344	22.2354736328125	1	house	0.217645254362898	0	NaN
54	LPs5	163129	lh	-38.0611419677734	-86.4750213623047	13.9915199279785	0.000979129521009337	house	1.48762771262901	0	NaN
54	LPs6	166307	lh	-25.4402160644531	-85.2358322143555	23.3632507324219	6.17527615195488e-07	house	2.68404636872912	1	NaN
54	LPs7	166304	lh	-26.9347820281982	-88.7685852050781	26.6192111968994	8.57162244576752e-08	tool	4.21388146875385	1	NaN
54	LPs8	164082	lh	-15.2446689605713	-95.0164642333984	2.99157309532166	1.39475590953689e-10	texture	8.2813304372299	1	NaN
54	LPs9	163656	lh	-17.5705146789551	-93.4009094238281	3.14606666564941	1.72824342981033e-14	texture	8.02312407696199	1	NaN
54	LTa1	38279	lh	-25.3935775756836	-36.2591323852539	-1.34121632575989	1	house	0.493922439829373	0	NaN
54	LTa10	172733	lh	-67.4157638549805	-35.1258087158203	-6.98535490036011	1	house	-0.347180070500433	0	NaN
54	LTa2	37465	lh	-19.8634357452393	-33.6823806762695	-6.80187606811523	1	house	0.132804414847617	0	NaN
54	LTa3	34903	lh	-24.5009574890137	-36.7918472290039	-14.2699069976807	0.679558073473415	house	0.46332559718844	0	NaN
54	LTa4	34267	lh	-26.3193550109863	-35.412353515625	-14.8434133529663	1	house	0.16152855805461	0	NaN
54	LTa5	37872	lh	-34.1572570800781	-36.0227737426758	-6.51800441741943	1	tool	0.121141887799486	0	NaN
54	LTa6	34358	lh	-16.8342361450195	-26.5909385681152	-20.7596321105957	1	tool	0.0713280818971555	0	NaN
54	LTa7	34358	lh	-16.8342361450195	-26.5909385681152	-20.7596321105957	1	texture	-0.0789892495625365	0	NaN
54	LTa8	173211	lh	-54.0677337646484	-30.2118396759033	-3.52029371261597	1	texture	-0.203182671306415	0	NaN
54	LTm1	37303	lh	-31.2686347961426	-35.7452812194824	-8.90709686279297	1	house	0.160188426685773	0	NaN
54	LTm10	170672	lh	-59.8833427429199	-20.3115272521973	-4.16771650314331	1	face	-0.117038622966181	0	0.252763677779627
54	LTm2	34241	lh	-20.0893630981445	-19.56960105896	-18.6154098510742	1	house	0.211816812386416	0	NaN
54	LTm3	33342	lh	-20.4789962768555	-25.6355628967285	-25.7643203735352	1	house	0.298870709997274	0	NaN
54	LTm4	34776	lh	-22.8706340789795	-20.3859977722168	-15.398265838623	1	house	-0.0320101276182806	0	NaN
54	LTm5	34463	lh	-17.1847991943359	-23.3077144622803	-18.6828231811523	1	tool	0.0895636671788464	0	NaN
54	LTm6	34676	lh	-17.5481719970703	-23.3814430236816	-17.3354434967041	1	tool	-0.22690829651601	0	NaN
54	LTm7	170689	lh	-49.9220199584961	-20.7263984680176	-5.13630867004395	1	texture	-0.291173205134475	0	NaN
54	LTm8	170685	lh	-51.0285682678223	-20.254940032959	-4.82089424133301	1	texture	-0.433310051936504	0	NaN
54	LTm9	171442	lh	-58.600715637207	-24.1838302612305	-5.67315053939819	1	house	-0.306305798803145	0	NaN
54	LTp10	174297	lh	-47.002685546875	-65.94140625	-6.38409805297852	1	texture	0.217729836025216	0	NaN
54	LTp2	36768	lh	-16.6813793182373	-38.2845649719238	-10.9148826599121	6.5591641006615e-12	house	6.09091244207748	1	NaN
54	LTp3	33021	lh	-29.0800533294678	-44.1348648071289	-9.69248199462891	0.531696972257233	house	3.26604824087139	0	NaN
54	LTp4	34060	lh	-31.0398635864258	-44.4851989746094	-8.75057983398438	0.62464449563233	tool	1.87729877031735	0	NaN
54	LTp5	30032	lh	-31.8092060089111	-64.8326568603516	-19.5307083129883	5.77994632475488e-15	face	5.13114875609984	1	4.53734719844142e-05
54	LTp6	30000	lh	-34.6846694946289	-65.46435546875	-18.1905250549316	2.95573401674294e-13	face	3.99801749016866	1	1.40555698574011e-09
54	LTp7	30091	lh	-32.543285369873	-74.3108367919922	-17.214786529541	1	house	0.479902781296375	0	NaN
54	LTp8	20437	lh	-33.5484504699707	-74.9667053222656	-17.5774078369141	1	texture	0.38433569424354	0	NaN
54	LTp9	172215	lh	-32.7792167663574	-79.2822265625	-5.17079782485962	1	texture	0.335759251289662	0	NaN
54	RDa1	22339	rh	17.1053695678711	-5.21081447601318	-25.0744438171387	1	house	0.533217329007747	0	NaN
54	RDa10	35876	rh	63.3742332458496	-10.3534889221191	-29.4819831848145	1	texture	0.570032849880493	0	NaN
54	RDa2	22215	rh	17.5477123260498	-6.01006603240967	-22.3318176269531	1	house	1.35009783534976	0	NaN
54	RDa3	21573	rh	27.5531539916992	-5.40589380264282	-21.8254051208496	1	house	0.374708397429062	0	NaN
54	RDa4	20901	rh	30.5468635559082	-6.30885887145996	-26.8581295013428	1	face	-0.114398740527925	0	0.464732023050688
54	RDa5	14822	rh	36.3803291320801	-11.6899156570435	-28.6558609008789	1	house	0.167705426665737	0	NaN
54	RDa6	14300	rh	39.9771347045898	-9.66890907287598	-25.7342987060547	1	texture	-0.0174651849400904	0	NaN
54	RDa7	14731	rh	40.0049705505371	-11.1278314590454	-20.5517330169678	1	tool	0.0977034058433416	0	NaN
54	RDa8	38569	rh	48.5109329223633	-10.1206893920898	-18.347770690918	1	tool	0.219094829133954	0	NaN
54	RDa9	38396	rh	50.2623138427734	-11.6743192672729	-19.1176223754883	1	texture	-0.0290316670941418	0	NaN
54	RDh1	21731	rh	32.451774597168	-19.9489231109619	-16.963285446167	1	house	0.318125052001437	0	NaN
54	RDh10	37555	rh	71.7521743774414	-32.3463172912598	-11.0806465148926	1	texture	-0.0401864297932685	0	NaN
54	RDh2	21066	rh	34.6142692565918	-19.958423614502	-17.6047210693359	1	tool	0.302447216279578	0	NaN
54	RDh3	10226	rh	36.4655876159668	-19.4616069793701	-18.086669921875	1	tool	0.0119256037957858	0	NaN
54	RDh4	16531	rh	37.0885925292969	-19.0824127197266	-17.750617980957	1	face	-0.115969217243133	0	0.206293838401067
54	RDh5	16360	rh	36.9483108520508	-18.3947067260742	-17.7230377197266	1	tool	-0.180003505984049	0	NaN
54	RDh6	39016	rh	60.0324668884277	-32.9800453186035	-3.79954290390015	1	tool	0.103877362062591	0	NaN
54	ROp1	173716	rh	5.7391562461853	-67.9534759521484	13.2326030731201	1.5269725475907e-16	texture	7.87014831899955	1	NaN
54	ROp10	165484	rh	41.0958786010742	-71.483154296875	5.65583229064941	1	tool	0.692813836510931	0	NaN
54	ROp2	173170	rh	3.40024065971375	-65.6079711914063	2.66212868690491	1.22841693924596e-19	texture	7.90328687012119	1	NaN
54	ROp3	173914	rh	1.15432262420654	-74.3446197509766	5.03138160705566	8.54303777084137e-17	house	4.66654758730213	1	NaN
54	ROp4	169695	rh	18.0199966430664	-64.1510696411133	-12.7060089111328	7.15950493189021e-20	house	10.3070831709271	1	NaN
54	ROp5	27553	rh	22.965503692627	-62.8042526245117	-11.6194467544556	3.9128862207381e-17	house	4.17420490101383	1	NaN
54	ROp6	169942	rh	25.1434116363525	-76.3084869384766	-6.18148136138916	3.06620192266617e-12	texture	3.19136686895485	1	NaN
54	ROp7	170342	rh	21.9229984283447	-78.8155746459961	-5.39604520797729	0.000159094267783697	house	0.878636344079652	0	NaN
54	ROp8	165147	rh	35.3395652770996	-83.4975204467773	8.34207725524902	1	texture	0.0648203063193076	0	NaN
54	ROp9	165660	rh	39.2616806030273	-71.2935104370117	5.98906421661377	0.25856229129341	tool	0.743474102972285	0	NaN
54	ROs8	168584	rh	50.6736679077148	-59.7834510803223	18.5422515869141	1	tool	0.0714546807831199	0	NaN
54	ROs9	168666	rh	49.9393730163574	-59.2816848754883	19.3959770202637	1	tool	0.123383078582549	0	NaN
54	RPi1	15996	rh	39.3559226989746	-15.1612462997437	-20.5763511657715	1	tool	-0.046117102692313	0	NaN
54	RPi10	29512	rh	25.6393814086914	-70.9305114746094	-13.8532886505127	1	tool	-0.0604203139393467	0	NaN
54	RPi11	169791	rh	23.8965587615967	-77.5513916015625	-12.8722696304321	1	texture	0.0109730482643509	0	NaN
54	RPi12	165746	rh	38.8867568969727	-70.9384460449219	6.28505516052246	1	house	0.234326084938236	0	NaN
54	RPi2	16178	rh	38.4265327453613	-16.3880176544189	-19.8533153533936	1	face	-0.186765410072802	0	0.354455149561641
54	RPi3	16778	rh	37.7651214599609	-19.0737266540527	-17.6582927703857	1	tool	-0.0406892227499226	0	NaN
54	RPi4	17178	rh	37.0313873291016	-21.6969718933105	-16.4451751708984	1	tool	0.185174671049725	0	NaN
54	RPi5	17621	rh	36.9867935180664	-23.806266784668	-15.5065326690674	1	texture	0.574245975447613	0	NaN
54	RPi6	10246	rh	37.2900390625	-30.1757278442383	-14.3215427398682	1	tool	0.244681337358956	0	NaN
54	RPi7	29170	rh	34.7750778198242	-57.6921806335449	-21.6337928771973	1	tool	0.13013601371205	0	NaN
54	RPi8	29261	rh	34.9273948669434	-59.8634872436523	-20.2206745147705	1	tool	-0.22834336399476	0	NaN
54	RPi9	29433	rh	28.033878326416	-69.6373443603516	-16.6848526000977	1	tool	-0.0136834142880931	0	NaN
54	RPm1	21341	rh	34.0542297363281	-23.1512641906738	-15.7606620788574	1	tool	0.25370207555514	0	NaN
54	RPm10	169803	rh	26.4898414611816	-76.7260513305664	-5.60140609741211	1.64128378909076e-12	face	2.07204224240245	1	0.334616383691796
54	RPm11	170076	rh	24.1169033050537	-77.3153991699219	-6.10962200164795	1	texture	0.529135129316291	0	NaN
54	RPm12	161903	rh	31.3877506256104	-99.7123565673828	1.08190298080444	7.77545974851126e-06	tool	1.54806851217029	0	NaN
54	RPm2	21615	rh	32.5120620727539	-26.7209053039551	-12.7621078491211	1	tool	-0.0784838265618823	0	NaN
54	RPm3	21087	rh	35.0889892578125	-29.7449989318848	-11.7778120040894	1	texture	0.537865853460258	0	NaN
54	RPm9	28746	rh	25.5066528320313	-67.9231262207031	-4.51739501953125	7.15822248126941e-07	texture	1.9855571201319	0	NaN
54	RPs6	140587	rh	14.1446743011475	-69.7160034179688	30.3386135101318	1	tool	0.176882390673739	0	NaN
54	RPs7	165064	rh	35.8507919311523	-87.1520462036133	11.5314445495605	0.0220597199054417	house	0.915636578729368	0	NaN
54	RTa1	26131	rh	34.6010589599609	-28.6252040863037	-20.5518093109131	1	house	-0.29845599911139	0	NaN
54	RTa10	157275	rh	59.1417236328125	-41.2999801635742	-13.9374265670776	1	face	0.00202870807512974	0	0.124917703882625
54	RTa2	24884	rh	28.7763938903809	-29.8191623687744	-18.4673480987549	1	house	-0.430112367857946	0	NaN
54	RTa3	21085	rh	35.1631736755371	-29.2719306945801	-12.7712631225586	1	house	-0.0340901735242289	0	NaN
54	RTa4	20667	rh	36.3172569274902	-25.5620288848877	-14.4299898147583	1	tool	0.311324024182522	0	NaN
54	RTa5	17403	rh	36.9944381713867	-22.60524559021	-16.2040328979492	1	house	-0.000959060624541123	0	NaN
54	RTa6	17104	rh	36.0716171264648	-22.0897674560547	-16.3014965057373	1	tool	-0.143669609976585	0	NaN
54	RTm1	25942	rh	35.2036743164063	-22.3458118438721	-25.7682018280029	1	texture	0.506257769716276	0	NaN
54	RTm2	24449	rh	26.7714233398438	-24.2175369262695	-28.8352966308594	1	texture	0.366518633851745	0	NaN
54	RTm3	25074	rh	32.3393173217773	-22.4092140197754	-25.4805374145508	1	tool	-0.0749779734907381	0	NaN
54	RTm4	16859	rh	37.7583656311035	-19.2798271179199	-17.5581321716309	1	tool	-0.163183347717948	0	NaN
54	RTm5	16446	rh	37.0483818054199	-18.6620635986328	-17.7082920074463	1	tool	-0.226797284117212	0	NaN
54	RTm6	16360	rh	36.9483108520508	-18.3947067260742	-17.7230377197266	1	texture	0.419166128504917	0	NaN
54	RTp10	150313	rh	45.8620223999023	-65.3526000976563	-19.7062950134277	1	house	0.168475241478474	0	NaN
54	RTp6	29548	rh	26.1471481323242	-70.9241180419922	-14.4640331268311	0.0824722698641065	texture	1.46232543157918	0	NaN
54	RTp7	169772	rh	32.9681053161621	-80.2814788818359	-17.3280239105225	0.863377678949186	tool	0.612981201915802	0	NaN
54	RTp8	169632	rh	34.7098274230957	-79.2438812255859	-16.5522422790527	1	tool	0.414528767457092	0	NaN
54	RTp9	150592	rh	46.2725372314453	-66.6775360107422	-13.8150701522827	1	house	0.229126606635051	0	NaN
57	LDP1	38865	lh	-10.0009698867798	-39.7430076599121	-0.770931899547577	1	house	0.220193629527947	0	NaN
57	LDP2	157902	lh	-14.46653175354	-42.3813591003418	-3.29045915603638	1	texture	1.11230849504411	0	NaN
57	LDP3	36935	lh	-18.2022590637207	-40.6411056518555	-10.4648265838623	1	house	0.752962705191401	0	NaN
57	LDP4	33946	lh	-30.9496803283691	-42.3870086669922	-9.9371509552002	1	house	0.207802886582957	0	NaN
57	LDP5	33722	lh	-30.6548366546631	-43.6683464050293	-9.24067497253418	1	house	0.131349560665801	0	NaN
57	LDP6	29273	lh	-41.8171081542969	-58.3366622924805	-12.438383102417	1	house	0.0549256972909812	0	NaN
57	LDP7	169812	lh	-47.9132537841797	-57.3383483886719	-16.0701313018799	1	house	0.255507344669529	0	NaN
57	LDP8	169817	lh	-51.198657989502	-58.6792793273926	-22.6125774383545	1	house	0.263631869266427	0	NaN
57	LDP9	170769	lh	-67.0989761352539	-34.8482513427734	-24.3151264190674	1	texture	0.342655028469549	0	NaN
57	LDa10	22431	lh	-52.3913421630859	-18.4282073974609	-10.4665050506592	1	house	-0.0134141330747082	0	NaN
57	LDa5	41179	lh	-29.6521682739258	-9.37061023712158	-17.5587253570557	1	texture	0.228053971373559	0	NaN
57	LDa6	41048	lh	-29.291353225708	-10.4119052886963	-17.8453674316406	1	house	0.475525166123911	0	NaN
57	LDa7	16316	lh	-40.6927757263184	-11.8241558074951	-6.85208702087402	1	house	0.105048399209463	0	NaN
57	LDa8	16659	lh	-40.2928009033203	-12.4437160491943	-7.31778812408447	1	house	-0.0235642257548417	0	NaN
57	LDa9	20999	lh	-49.5981292724609	-18.0194416046143	-10.3905382156372	1	texture	0.00143519796659931	0	NaN
57	LDh1	34009	lh	-27.3729419708252	-15.7265863418579	-19.7815265655518	1	texture	0.315149488865479	0	NaN
57	LDh2	34337	lh	-30.0800457000732	-17.5271701812744	-19.6996631622314	1	texture	0.685646954845867	0	NaN
57	LDh3	40654	lh	-29.320650100708	-14.6689796447754	-14.2290706634521	1	tool	0.488791336251021	0	NaN
57	LDh4	35152	lh	-37.8525466918945	-16.4629058837891	-18.0638885498047	1	texture	-0.0169502302727156	0	NaN
57	LDh5	26965	lh	-39.366138458252	-11.9337635040283	-27.768238067627	1	texture	-0.161453888860051	0	NaN
57	LDh6	24152	lh	-50.9455986022949	-8.2858943939209	-25.6175155639648	1	texture	-0.0532490537013742	0	NaN
57	LDi1	10352	lh	-35.493537902832	-6.12927579879761	8.58882522583008	1	face	0.13284571829337	0	0.240236737211828
57	LDi2	130880	lh	-44.7468681335449	-4.83293199539185	2.93129920959473	1	face	0.420988540150128	0	0.408165108486932
57	LDi3	138310	lh	-47.3971138000488	-12.2415409088135	4.60930633544922	1	house	0.130403950900739	0	NaN
57	LDi4	138757	lh	-54.1334419250488	-14.222674369812	7.14168834686279	1	face	0.296468998917585	0	0.386261637734105
57	LDi5	138888	lh	-56.2162055969238	-15.3186111450195	7.28893280029297	1	face	0.239895644825078	0	0.407034353267676
57	LGRD1	21327	lh	-36.0904922485352	21.0337505340576	-42.5602111816406	1	house	-0.144618425555843	0	NaN
57	LGRD10	18093	lh	-50.4634208679199	20.8400573730469	-30.6795406341553	1	tool	-0.112962476779291	0	NaN
57	LGRD11	18531	lh	-51.4132232666016	7.91776657104492	-25.0021457672119	1	house	-0.102703407441832	0	NaN
57	LGRD12	21111	lh	-50.2680053710938	-6.78602266311646	-17.3665199279785	1	face	-0.115968382487758	0	0.269148836597337
57	LGRD13	23501	lh	-60.4482040405273	-6.80718564987183	-13.0649127960205	1	texture	-0.0845084914199295	0	NaN
57	LGRD14	139293	lh	-66.4540100097656	-17.6509571075439	0.591654419898987	1	face	-0.0460094242503997	0	0.268699192754411
57	LGRD17	16365	lh	-42.0464553833008	18.4384174346924	-18.6907577514648	1	house	0.038850741271605	0	NaN
57	LGRD18	17269	lh	-51.2875328063965	19.6800842285156	-14.3154640197754	1	house	0.177306657655526	0	NaN
57	LGRD19	18115	lh	-57.6568832397461	13.1201105117798	-11.8235788345337	1	face	-0.204355258399607	0	0.357724225103865
57	LGRD2	20942	lh	-52.5250473022461	16.2673568725586	-33.2474365234375	1	texture	-0.0597484002724556	0	NaN
57	LGRD20	18766	lh	-58.9810447692871	4.74735307693481	-8.83884620666504	1	face	-0.129832218913379	0	0.221221634392007
57	LGRD21	19819	lh	-62.5966415405273	-12.2800016403198	-3.88406205177307	1	texture	0.0139131901542186	0	NaN
57	LGRD22	139110	lh	-58.4389724731445	-9.91902446746826	7.51269960403442	1	tool	0.233713544785678	0	NaN
57	LGRD23	94808	lh	-65.9281005859375	-3.39080619812012	13.1736135482788	1	tool	0.283072458400339	0	NaN
57	LGRD24	149437	lh	-66.1081848144531	-24.1294231414795	15.8997735977173	1	face	0.0809229996551929	0	0.281580800822915
57	LGRD25	7718	lh	-49.2223167419434	25.7483978271484	-16.0698928833008	1	texture	0.00265706299312252	0	NaN
57	LGRD27	17854	lh	-52.157299041748	13.0582389831543	-8.54360675811768	1	house	0.176061950161374	0	NaN
57	LGRD28	18494	lh	-55.4258041381836	3.05003213882446	-3.44949293136597	1	texture	0.195852532159607	0	NaN
57	LGRD29	19215	lh	-64.2141494750977	-1.62619698047638	-2.53822994232178	1	face	0.0499798164969433	0	0.23087286163394
57	LGRD3	20813	lh	-55.7754440307617	10.1705188751221	-29.4611015319824	1	house	-0.284357753976565	0	NaN
57	LGRD30	95854	lh	-57.333324432373	-0.329970121383667	8.82709217071533	1	tool	-0.133961539352254	0	NaN
57	LGRD31	93043	lh	-59.0595626831055	-1.48080992698669	20.2530345916748	0.444330858993851	face	0.443692514261991	0	0.495426709691258
57	LGRD32	129812	lh	-56.9723281860352	-21.8969440460205	20.5892009735107	1	house	0.376218781361551	0	NaN
57	LGRD33	8926	lh	-53.8793563842773	37.7999839782715	-7.83266925811768	1	face	0.199748588249643	0	0.322556567198972
57	LGRD34	54606	lh	-52.6190948486328	36.839038848877	6.84814739227295	1	texture	0.017355222882993	0	NaN
57	LGRD35	53265	lh	-53.4860076904297	28.9538173675537	4.10616159439087	1	face	-0.189327778062948	0	0.479947747362683
57	LGRD36	51662	lh	-60.5470962524414	20.3432579040527	5.67538547515869	1	face	-0.0720737171902837	0	0.368045098665631
57	LGRD37	98956	lh	-62.8762435913086	10.0060329437256	17.8483772277832	1	house	-0.143905589890926	0	NaN
57	LGRD38	95565	lh	-55.1194915771484	1.35624945163727	15.1242570877075	1	house	1.07216465117119	0	NaN
57	LGRD39	94257	lh	-54.5068664550781	0.666360259056091	16.3328952789307	1	tool	0.122770659912276	0	NaN
57	LGRD4	23247	lh	-64.2564544677734	-2.29425835609436	-24.1095027923584	1	house	-0.00716835162381905	0	NaN
57	LGRD40	89615	lh	-63.1981887817383	-12.6769990921021	31.7239837646484	1	texture	-0.0642030820284373	0	NaN
57	LGRD41	8886	lh	-47.320426940918	43.1029891967773	-5.95755195617676	1	tool	0.118715144524788	0	NaN
57	LGRD42	54597	lh	-48.6072692871094	38.6361694335938	6.23951530456543	1	texture	0.631727986851896	0	NaN
57	LGRD43	52291	lh	-55.1072692871094	26.1364269256592	8.41201591491699	1	house	-0.234917015340959	0	NaN
57	LGRD44	50859	lh	-57.6966018676758	26.3236427307129	16.4585418701172	1	house	0.528751391876193	0	NaN
57	LGRD45	99314	lh	-59.9769096374512	21.6425876617432	25.6163196563721	1	face	0.169793622420771	0	0.451641102806969
57	LGRD46	94464	lh	-52.948917388916	3.74280405044556	18.5482749938965	1	tool	0.227869713698827	0	NaN
57	LGRD47	93594	lh	-56.5525131225586	0.733535528182983	17.2733936309814	1	house	0.492191356579764	0	NaN
57	LGRD48	89295	lh	-62.4942436218262	-6.68197345733643	35.033088684082	0.0647432309082779	tool	0.913627743849694	0	NaN
57	LGRD49	163892	lh	-29.4494132995605	-91.030403137207	12.9873962402344	0.907699044395605	house	2.39042400291703	0	NaN
57	LGRD5	24383	lh	-64.9059677124023	-20.7328186035156	-24.5257415771484	1	tool	-0.109842969928255	0	NaN
57	LGRD50	162675	lh	-42.0715103149414	-85.0385131835938	19.6911334991455	1	tool	0.868427052677905	0	NaN
57	LGRD51	161202	lh	-39.2712326049805	-74.7939453125	21.9788017272949	0.00388547656111152	texture	1.01268719245987	0	NaN
57	LGRD52	175079	lh	-55.2443618774414	-52.3616485595703	-7.55192375183105	3.73765660864811e-15	texture	3.07304673149363	1	NaN
57	LGRD53	175704	lh	-64.6933822631836	-55.2722778320313	-2.99526834487915	1	tool	-0.115555768198149	0	NaN
57	LGRD59	175991	lh	-44.3652534484863	-70.0459136962891	4.0330696105957	0.00696961620041042	tool	3.16132929852322	1	NaN
57	LGRD6	169720	lh	-69.9439544677734	-20.8092823028564	-8.7311544418335	1	house	-0.062670192867685	0	NaN
57	LGRD60	175240	lh	-43.7592353820801	-61.9185028076172	-4.04032135009766	1	face	0.520058507866743	0	0.0562033671850653
57	LGRD61	173489	lh	-55.2712478637695	-50.7996826171875	-12.5504932403564	1	tool	0.538827987877624	0	NaN
57	LGRD9	20656	lh	-43.3316612243652	20.581521987915	-38.9572906494141	1	face	0.0272426987254097	0	0.376881699047871
57	LO1	167245	lh	-11.1769485473633	-92.9960632324219	24.4513988494873	0.0479785119051405	house	2.67745523001577	1	NaN
57	LO2	167048	lh	-12.5238246917725	-94.8389053344727	32.674488067627	1	house	-0.341819196933381	0	NaN
57	LO3	163588	lh	-33.2938003540039	-88.3988723754883	30.1037063598633	1	house	0.559626644468575	0	NaN
57	LO4	162445	lh	-42.5362358093262	-83.0914459228516	26.1478843688965	1	house	0.405266740242661	0	NaN
57	LO5	120005	lh	-42.5569305419922	-65.1912460327148	31.8388252258301	1	tool	0.386266855132052	0	NaN
57	LO6	143277	lh	-52.3243827819824	-64.0868148803711	33.4483108520508	1	face	-0.187923170969459	0	0.179774788978492
57	LO7	143308	lh	-58.0272369384766	-55.6916427612305	24.2717971801758	1	house	-0.176034963603489	0	NaN
57	LTa1	20771	lh	-25.9343490600586	21.7130699157715	-38.7124176025391	1	house	0.160034612424512	0	NaN
57	LTa2	21697	lh	-24.4377460479736	17.1740570068359	-41.4020156860352	1	house	-0.0176098016744249	0	NaN
57	LTa3	23294	lh	-20.6710090637207	2.3895058631897	-40.1717910766602	1	face	0.0590038314286842	0	0.497134209857849
57	LTa4	25434	lh	-28.1051445007324	-5.64107322692871	-32.3985595703125	1	tool	0.0454494075870901	0	NaN
57	LTm1	38761	lh	-9.99044227600098	-41.3451919555664	-1.17458581924438	1	tool	0.381334845412846	0	NaN
57	LTm2	35493	lh	-15.2173099517822	-29.5677452087402	-15.3739433288574	1	texture	-0.0282083269121383	0	NaN
57	LTm3	32007	lh	-30.8106918334961	-26.3741111755371	-22.3274192810059	1	texture	0.138935592350722	0	NaN
57	LTm4	28230	lh	-36.1479721069336	-31.1366539001465	-30.7356414794922	1	house	0.122539988131626	0	NaN
57	LTm6	26039	lh	-49.1065216064453	-14.5973339080811	-39.6303596496582	1	house	0.0832449193427103	0	NaN
57	LTo1	164666	lh	-17.7886543273926	-105.493728637695	-8.8051233291626	9.18017299695013e-21	texture	19.664228011528	1	NaN
57	LTo2	162152	lh	-26.3278503417969	-93.6896667480469	3.29940938949585	1	texture	1.4960536896587	0	NaN
57	LTo3	160890	lh	-33.5756454467773	-96.8253402709961	0.904204905033112	3.19293683446462e-07	texture	3.19917402700813	1	NaN
57	LTo4	174759	lh	-36.3511352539063	-81.9140930175781	-5.03794860839844	6.35836891674137e-07	tool	3.24093646845134	1	NaN
57	LTo5	173973	lh	-31.7377586364746	-85.9855117797852	-1.38549244403839	7.91234182119726e-10	face	1.87101553804514	0	0.172170900668715
57	LTo6	172712	lh	-61.2996444702148	-56.0172691345215	-11.7224855422974	1	texture	0.487409571849348	0	NaN
57	LTp1	152154	lh	0.804907202720642	-84.8474197387695	-8.76724815368652	0.196553087035201	texture	12.7970403462829	0	NaN
57	LTp3	34517	lh	-24.9428558349609	-63.4547119140625	-10.5639743804932	1	texture	0.670072674766434	0	NaN
57	LTp4	30853	lh	-26.5741119384766	-61.1452598571777	-17.4228172302246	1	house	1.55561429010474	0	NaN
57	LTp5	29554	lh	-27.0170249938965	-49.6344985961914	-19.5036525726318	1	tool	0.869689095177754	0	NaN
57	LTp6	29243	lh	-27.1480255126953	-45.1569290161133	-20.2510299682617	0.6607019009427	house	0.295637942986543	0	NaN
57	LTp7	29020	lh	-29.5236072540283	-39.8830184936523	-24.7778835296631	1	house	0.0993111256937382	0	NaN
57	LTp8	26908	lh	-55.0411949157715	-27.9195117950439	-29.2234344482422	1	texture	0.282149207024918	0	NaN
57	LTx1	10185	lh	-21.403434753418	9.9370584487915	-31.0815734863281	1	tool	0.361678241784931	0	NaN
57	LTx2	21301	lh	-21.5881671905518	17.8225803375244	-39.7612724304199	1	house	0.492096507411999	0	NaN
57	LTx3	21838	lh	-28.2814979553223	14.4763431549072	-37.594669342041	1	texture	0.29720340700067	0	NaN
57	LTx4	22959	lh	-32.1256866455078	5.56352472305298	-38.485969543457	1	texture	0.0820997329339791	0	NaN
59	RDa1	20465	rh	21.4171810150146	1.15162074565887	-25.7650566101074	1	face	-0.126693912951432	0	0.46129381137925
59	RDa10	36325	rh	62.3194732666016	-8.97642993927002	-26.2065372467041	1	face	-0.0245167872045359	0	0.0558172324851484
59	RDa2	20888	rh	23.796215057373	-1.46965086460114	-28.3698253631592	1	texture	0.393493310490554	0	NaN
59	RDa3	13035	rh	30.8669185638428	-2.5533013343811	-31.2392711639404	1	face	-0.189235995848596	0	0.358036842188334
59	RDa4	13737	rh	34.2217903137207	-6.42688179016113	-31.7999515533447	1	house	0.423335117590288	0	NaN
59	RDa5	13516	rh	38.0030555725098	-7.94659233093262	-28.8478965759277	1	face	0.0223405320525405	0	0.507752934893555
59	RDa6	26531	rh	40.492992401123	-7.26711368560791	-32.7821960449219	1	tool	0.273409244065715	0	NaN
59	RDa7	35088	rh	49.9590530395508	-5.03828144073486	-30.8049087524414	1	face	0.428266259616085	0	0.214390286204367
59	RDa8	35290	rh	50.4977111816406	-6.86920881271362	-29.6613502502441	1	house	0.294430362038853	0	NaN
59	RDa9	35869	rh	56.4364318847656	-5.79379749298096	-26.8794708251953	1	face	0.267856428288167	0	0.135451074939101
59	RDh1	22481	rh	24.9155178070068	-12.4781703948975	-20.3746547698975	1	face	-0.0139445155164974	0	0.452484729942945
59	RDh10	36771	rh	71.4842147827148	-26.8960990905762	-18.4902858734131	1	house	0.457654316477468	0	NaN
59	RDh2	21723	rh	30.4887008666992	-16.657772064209	-20.7600555419922	1	texture	0.248473455218301	0	NaN
59	RDh3	21330	rh	32.8712768554688	-17.3774070739746	-19.2065162658691	1	house	-0.167778002921946	0	NaN
59	RDh4	10223	rh	36.1129684448242	-17.8177394866943	-18.7257385253906	1	face	0.00991940984355119	0	0.481177247535497
59	RDh6	27264	rh	43.4925384521484	-17.3744449615479	-24.1284122467041	1	face	0.493456322335088	0	0.472883108670892
59	RDh7	39005	rh	51.4108695983887	-20.6270980834961	-11.0751972198486	1	house	0.387343050944658	0	NaN
59	RDh8	35889	rh	57.8953971862793	-23.4840297698975	-18.407657623291	1	tool	0.371993588174123	0	NaN
59	RDh9	35980	rh	59.1732063293457	-22.841178894043	-19.3916301727295	1	tool	0.384090868182064	0	NaN
59	RFo1	9177	rh	4.46173572540283	39.0865669250488	-29.827730178833	1	house	-0.251970163517151	0	NaN
59	RFo10	1745	rh	51.5205001831055	20.9062767028809	-4.17483043670654	1	face	0.0784177934118793	0	0.309601783430888
59	RFo11	2018	rh	58.8856391906738	32.4128875732422	-7.64487361907959	1	face	0.275809219673189	0	0.210786399970845
59	RFo12	2526	rh	56.2508354187012	37.5451545715332	-11.61252784729	1	face	0.236573050764126	0	0.434959086427637
59	RFo2	8894	rh	7.26230049133301	38.2601470947266	-28.6849880218506	1	face	0.0417927542513617	0	0.452484729942945
59	RFo3	7265	rh	15.659065246582	40.1820907592773	-27.6883583068848	1	texture	0.638065872642629	0	NaN
59	RFo4	6873	rh	20.3079376220703	37.7011222839355	-24.9911918640137	1	tool	0.0387754179269687	0	NaN
59	RFo5	6543	rh	22.6582813262939	35.6940269470215	-24.1492137908936	1	house	-0.0281398072881765	0	NaN
59	RFo6	6377	rh	25.6905746459961	39.1323394775391	-23.8253307342529	1	texture	-0.274733143633008	0	NaN
59	RFo7	4654	rh	29.8163299560547	32.8372840881348	-12.1925792694092	0.596627668257388	texture	0.64587315529097	0	NaN
59	RFo8	4124	rh	37.7667503356934	31.9197330474854	-13.1739635467529	1	house	0.194068204748063	0	NaN
59	RFo9	3570	rh	44.2677307128906	27.3286113739014	-14.1845378875732	1	face	0.403238236466395	0	0.206380572677827
59	RO10	164935	rh	46.5098686218262	-73.8146438598633	2.86289954185486	3.22090460689979e-13	face	2.30584458233953	1	0.164776091372421
59	RO12	165752	rh	41.3267593383789	-71.9699401855469	9.38173961639404	2.08492835850655e-05	face	1.25262218110375	0	0.0382675804994719
59	RO2	176750	rh	9.08926868438721	-95.1684875488281	-1.56470239162445	3.04240889190308e-19	texture	12.4091509602425	1	NaN
59	RO3	176313	rh	11.2337026596069	-94.0701675415039	0.844065308570862	7.10178645873155e-18	texture	5.69826280723002	1	NaN
59	RO4	175838	rh	11.300708770752	-93.865478515625	-1.13859295845032	1.21293491888542e-13	texture	6.8255596861432	1	NaN
59	RO5	163202	rh	27.7599182128906	-90.7289810180664	-0.0621970407664776	5.0321015023113e-12	texture	3.76323321769478	1	NaN
59	RO6	163421	rh	29.3543167114258	-91.5954284667969	3.81429553031921	1.41893864216539e-17	texture	3.59181938530419	1	NaN
59	RO7	163497	rh	45.4128379821777	-75.3753890991211	-8.90414524078369	7.84250550343507e-16	house	3.32711136794	1	NaN
59	RO8	163712	rh	43.8047790527344	-74.7170333862305	-8.12514781951904	1.20994720713153e-12	house	2.22300884890522	1	NaN
59	RO9	162349	rh	48.3762321472168	-74.8304290771484	-15.0105676651001	7.40223513905772e-14	tool	2.04967126802428	1	NaN
59	RTIa1	23997	rh	26.0998554229736	-12.7136850357056	-33.9500694274902	1	house	-0.0348105300146539	0	NaN
59	RTIa10	34169	rh	56.2522201538086	-38.4485473632813	-22.1362152099609	1	tool	0.0475497502330385	0	NaN
59	RTIa2	24754	rh	29.6420459747314	-17.4223976135254	-35.3819999694824	1	texture	0.13265630200214	0	NaN
59	RTIa4	26289	rh	43.5311851501465	-21.5883045196533	-35.997802734375	0.392544405891128	tool	0.76415250177438	0	NaN
59	RTIa5	30676	rh	47.2782287597656	-25.0480499267578	-28.7696838378906	0.000416387582972622	face	1.292771705969	0	0.0747976154128598
59	RTIa6	31227	rh	51.8271102905273	-28.5955219268799	-26.7368087768555	1	texture	0.0460940669477854	0	NaN
59	RTIa7	35705	rh	54.165168762207	-26.2239227294922	-17.171932220459	1	texture	0.427930936157151	0	NaN
59	RTIa9	36943	rh	65.4103775024414	-33.5466804504395	-19.7061405181885	1	tool	0.519753454632312	0	NaN
59	RTIp1	25127	rh	10.0434341430664	-47.1757202148438	-0.246232986450195	1	house	-0.0576208392145752	0	NaN
59	RTIp10	153328	rh	56.1409683227539	-53.7854080200195	-6.3353157043457	0.0622588387647511	face	0.626206839879104	0	0.478964751315578
59	RTIp2	172295	rh	24.817554473877	-51.8458938598633	1.673180103302	1	house	0.73175721267789	0	NaN
59	RTIp3	26164	rh	24.4735774993896	-47.140193939209	-11.0913991928101	0.000854107180964185	house	2.93608681930983	1	NaN
59	RTIp4	26683	rh	27.0096473693848	-50.8158645629883	-7.92079162597656	3.94530218448017e-07	house	4.20186870970901	1	NaN
59	RTIp5	27314	rh	29.5334415435791	-51.7555656433105	-8.38944435119629	2.65843635901789e-06	house	4.27268112171615	1	NaN
59	RTIp6	151618	rh	46.5965156555176	-58.6980438232422	-12.782543182373	0.0836968516156076	house	0.858306786764913	0	NaN
59	RTIp7	152000	rh	52.8639183044434	-62.1989364624023	-13.8984613418579	0.00198595672866203	tool	0.968894894211062	0	NaN
59	RTIp8	151649	rh	44.7440032958984	-73.5728454589844	-4.27850675582886	0.381295868180017	tool	0.955444588065206	0	NaN
59	RTIp9	152026	rh	49.0331115722656	-69.3735656738281	-6.51619434356689	0.00311544438142138	face	0.960693163834334	0	0.147616481970171
59	RTSa1	45354	rh	42.0129051208496	-6.40114593505859	-8.46010875701904	1	tool	-0.0972375111371458	0	NaN
59	RTSa2	45639	rh	47.0251121520996	-2.96571183204651	-7.14200878143311	1	texture	0.533971013873116	0	NaN
59	RTSa3	43693	rh	46.0272979736328	-9.38914775848389	-8.32933616638184	1	tool	0.224237399858162	0	NaN
59	RTSa4	43579	rh	46.4737205505371	-7.93455600738525	-8.22612285614014	1	texture	0.365348515511675	0	NaN
59	RTSa5	39539	rh	56.7154960632324	-7.37770557403564	-10.993109703064	1	texture	0.257886180003015	0	NaN
59	RTSa7	39789	rh	61.591438293457	-2.31897640228271	-11.093918800354	1	house	0.110039600877875	0	NaN
59	RTSa8	39817	rh	61.4598922729492	-3.38793516159058	-12.2941703796387	1	house	0.146193848416731	0	NaN
59	RTSp1	47627	rh	36.5952224731445	4.25644207000732	8.65944957733154	1	house	0.0684870627292125	0	NaN
59	RTSp2	47185	rh	39.9460601806641	4.39469528198242	7.70188522338867	1	house	0.159153897660899	0	NaN
59	RTSp3	185196	rh	51.3641204833984	3.59833002090454	-2.20616054534912	1	tool	0.0937628683555165	0	NaN
59	RTSp4	43019	rh	49.0240020751953	-8.92947292327881	-0.0950498878955841	1	face	-0.259507783410649	0	0.398123507442242
59	RTSp5	42543	rh	57.6157608032227	-7.86743116378784	6.69843721389771	1	house	-0.0356728512550548	0	NaN
59	RTSp6	40003	rh	66.3908309936523	-9.54410552978516	-13.0619297027588	1	tool	0.362058857778267	0	NaN
59	RTSp7	40007	rh	65.5212554931641	-15.7419137954712	-11.4589881896973	1	tool	0.000755370516951645	0	NaN
59	RTSp8	40064	rh	66.6196670532227	-21.4249305725098	-6.34394836425781	1	face	0.100226894860523	0	0.468873426497735
59	RTSp9	40096	rh	66.5226364135742	-18.8199443817139	-3.37637877464294	1	face	0.111836944253095	0	0.448880400784786
59	RTo1	178534	rh	8.72655296325684	-81.859733581543	32.4796485900879	1	texture	0.732721530376322	0	NaN
59	RTo10	168588	rh	55.2710342407227	-61.3310165405273	19.4133853912354	1	house	0.226033332565256	0	NaN
59	RTo11	168633	rh	56.9475631713867	-64.1603775024414	21.7483196258545	1	tool	-0.200686233463736	0	NaN
59	RTo12	168930	rh	52.6469993591309	-60.0024566650391	28.8794479370117	1	texture	0.148407154380435	0	NaN
59	RTo2	178466	rh	12.8274192810059	-78.7612609863281	26.7444725036621	1	texture	-0.10865376246299	0	NaN
59	RTo5	141374	rh	19.1002254486084	-65.9383697509766	33.6355590820313	1	house	0.501564688751912	0	NaN
59	RTo6	141647	rh	23.0109977722168	-62.5349960327148	24.6103630065918	0.109937801869721	house	1.39339847504155	0	NaN
59	RTo7	118657	rh	28.1898937225342	-64.7637252807617	37.3217506408691	1.47091733743292e-09	house	3.16805500713289	1	NaN
59	RTo8	118036	rh	32.6171875	-65.6475677490234	34.3472099304199	0.023488399920845	house	1.46705566592546	0	NaN
59	RTo9	113177	rh	40.0373954772949	-58.5533218383789	40.7108306884766	1	house	0.802251068998517	0	NaN
59	RTx1	31939	rh	26.1078681945801	18.307430267334	-41.1454772949219	1	house	-0.183336753915309	0	NaN
59	RTx2	31425	rh	22.9352207183838	15.6068477630615	-44.2067184448242	1	tool	-0.0442854357361419	0	NaN
59	RTx3	31430	rh	21.7225170135498	11.60791015625	-46.2220993041992	1	face	-0.0619160920196331	0	0.260289681414204
59	RTx4	31953	rh	25.4015655517578	10.7633152008057	-47.9847946166992	1	face	0.127820728928281	0	0.062347590283206
59	RTx5	33190	rh	35.5225715637207	9.9468240737915	-42.0951919555664	1	face	0.0740641487815625	0	0.454867031256284
59	RTx6	33998	rh	35.8719711303711	10.34446144104	-37.8974456787109	1	face	0.0737049848292867	0	0.464866899030388
59	RTx7	35165	rh	38.5215187072754	7.84710597991943	-43.6982727050781	1	face	0.136714071320971	0	0.280865584429005
59	RTx8	34235	rh	47.4098739624023	7.38657569885254	-42.0690231323242	1	tool	0.335380640872833	0	NaN
59	RTx9	36216	rh	56.5493087768555	8.36651802062988	-36.598804473877	1	house	0.00127648361371119	0	NaN
62	Dc10	67170	lh	-18.9047527313232	27.4009742736816	61.086799621582	1	face	-0.0438477954385286	0	0.0504043072875608
62	Dc3	185391	lh	-2.23286747932434	17.3101692199707	22.1205921173096	1	texture	-0.254354430358662	0	NaN
62	Dc4	185560	lh	-1.07849419116974	18.6276531219482	23.6109943389893	1	face	-0.201658619332034	0	0.470362143302649
62	Dc5	187390	lh	-5.82884454727173	17.0604877471924	37.7971267700195	1	texture	-0.14836834557212	0	NaN
62	Dc6	70684	lh	-24.8445129394531	10.9366455078125	46.307243347168	1	texture	-0.109922491653071	0	NaN
62	Dc7	65339	lh	-18.4007835388184	18.627613067627	46.6582641601563	1	face	-0.0771403846980519	0	0.488368255372697
62	Dc8	65533	lh	-17.5858478546143	20.1465091705322	48.454719543457	1	house	0.0321910560763459	0	NaN
62	Dc9	65909	lh	-16.2337341308594	23.221492767334	50.9371795654297	1	face	-0.094058585534744	0	0.3622023906964
62	LDa10	22634	lh	-51.8445777893066	-2.7715048789978	-34.0095558166504	1	house	-0.132425819832198	0	NaN
62	LDa6	31940	lh	-34.1358985900879	-5.05309295654297	-27.9995975494385	1	texture	-0.157667554462476	0	NaN
62	LDa7	22743	lh	-40.333366394043	6.90365409851074	-33.6319541931152	1	face	-0.0729220969653124	0	0.417346487667815
62	LDa8	22377	lh	-43.8014602661133	6.34520578384399	-34.899585723877	1	house	0.0480887393339064	0	NaN
62	LDa9	22629	lh	-46.475471496582	2.20453548431396	-34.265308380127	1	house	0.0710966266766725	0	NaN
62	LDh1	34123	lh	-25.9126586914063	-16.2263507843018	-18.5961513519287	1	face	-0.0266249070150912	0	0.430498655562715
62	LDh10	23130	lh	-64.7237777709961	-2.7123761177063	-22.5956077575684	1	house	-0.228451782261341	0	NaN
62	LDh3	35455	lh	-37.6550788879395	-20.4854850769043	-17.7342319488525	1	house	-0.00156308372553733	0	NaN
62	LDh4	30668	lh	-27.6715049743652	-24.4575252532959	-31.9577217102051	1	house	-0.207609428838857	0	NaN
62	LDh5	20714	lh	-48.2848358154297	-12.5572557449341	-16.4803981781006	1	tool	-0.174528980985955	0	NaN
62	LDh6	20847	lh	-48.2898788452148	-11.1908502578735	-18.3620529174805	1	house	0.173641889602396	0	NaN
62	LDh7	21247	lh	-50.7446975708008	-8.24577903747559	-18.0756683349609	1	face	-0.0643875003567645	0	0.442038469220564
62	LDh8	21640	lh	-53.4039497375488	-6.2750096321106	-17.5657272338867	1	house	0.0449941033651747	0	NaN
62	LDh9	22026	lh	-55.8873901367188	-5.35776805877686	-18.4272155761719	1	house	0.0312658937833158	0	NaN
62	LFa10	54726	lh	-33.7620544433594	28.7839183807373	35.6189384460449	1	face	-0.12039050710612	0	0.399672046353421
62	LFa11	53978	lh	-35.8295211791992	30.308536529541	39.9861145019531	1	house	-0.109048828697327	0	NaN
62	LFa12	53757	lh	-38.2673568725586	30.0988788604736	40.7842979431152	1	texture	-0.187479575187121	0	NaN
62	LFa4	181848	lh	-9.27379512786865	46.4241218566895	3.66223454475403	1	face	-0.12209659994246	0	0.495215409512857
62	LFa5	182434	lh	-11.9488945007324	47.3201446533203	6.9086127281189	1	texture	-0.224747081958396	0	NaN
62	LFa6	183532	lh	-11.3901290893555	45.8082809448242	12.1749601364136	1	face	-0.19098782140207	0	0.468453892881721
62	LFa7	56921	lh	-22.4237823486328	38.5381660461426	28.0264205932617	1	texture	-0.184048104878518	0	NaN
62	LFa8	55812	lh	-28.8198795318604	35.0578193664551	26.1712608337402	1	face	-0.150861099893668	0	0.483736509708241
62	LFa9	55227	lh	-31.6030979156494	26.8676948547363	33.0334968566895	1	face	-0.103658567666233	0	0.442964561996315
62	LFm1	68111	lh	-1.55458092689514	24.6158447265625	46.1236839294434	1	house	0.10194074283783	0	NaN
62	LFm10	92402	lh	-53.2925491333008	6.31211185455322	27.5097160339355	1	texture	-0.0780223304460666	0	NaN
62	LFm11	94139	lh	-51.9112663269043	2.28864288330078	22.9841823577881	1	face	-0.178239650067263	0	0.189342655969304
62	LFm12	94032	lh	-53.1799011230469	2.56873297691345	21.833740234375	1	face	-0.183294885095617	0	0.313152133845823
62	LFm2	67850	lh	-1.00158977508545	27.5594425201416	45.3249473571777	1	house	-0.187427627403862	0	NaN
62	LFm3	65055	lh	-20.3917903900146	24.7646484375	44.7717781066895	1	house	-0.0259936156913243	0	NaN
62	LFm4	64643	lh	-19.5837650299072	22.3763561248779	42.5102195739746	1	texture	-0.0806751917668716	0	NaN
62	LFm6	94313	lh	-42.1064605712891	10.426342010498	37.6127967834473	1	face	-0.130617386831076	0	0.245592404198503
62	LFm7	94826	lh	-47.1957817077637	9.77583980560303	35.424259185791	1	house	0.187936850628821	0	NaN
62	LFm8	52733	lh	-45.66259765625	35.0976715087891	31.3186378479004	1	house	0.245666910464759	0	NaN
62	LFm9	52369	lh	-47.9334983825684	32.5025253295898	29.3911819458008	1	house	-0.0451018776812388	0	NaN
62	LFo10	8483	lh	-50.5928573608398	28.7251110076904	-5.52557229995728	1	texture	-0.00613154986324348	0	NaN
62	LFo11	8054	lh	-54.0405082702637	25.6780967712402	-9.84080505371094	1	face	-0.114089670014485	0	0.273562918972484
62	LFo12	54179	lh	-53.2820663452148	30.5685138702393	3.53559422492981	1	face	-0.133433510890107	0	0.30638454087732
62	LFo7	4952	lh	-30.944787979126	32.6915473937988	-15.6822328567505	1	face	0.00270879939343386	0	0.451317463436312
62	LFo9	7282	lh	-43.1421012878418	29.4438400268555	-16.1686630249023	1	house	0.0161916021458002	0	NaN
62	LFp1	189270	lh	-7.47321128845215	-47.0808029174805	45.0476608276367	1	house	0.238642703896532	0	NaN
62	LFp10	148252	lh	-55.1235122680664	-37.5034408569336	26.043140411377	1	house	0.119475528171981	0	NaN
62	LFp11	148194	lh	-56.7653694152832	-34.4760437011719	25.5305309295654	1	house	0.0560984771518049	0	NaN
62	LFp12	148129	lh	-63.8634872436523	-31.0366630554199	29.7997207641602	1	house	-0.194645403847355	0	NaN
62	LFp2	190346	lh	-9.8069486618042	-46.2352485656738	44.6431427001953	1	house	0.173299655867329	0	NaN
62	LFp3	191838	lh	-10.6746339797974	-45.2403259277344	39.127799987793	1	house	-0.152214728355621	0	NaN
62	LFp4	121407	lh	-35.7349739074707	-46.7018508911133	45.6794967651367	1	house	-0.133838323822796	0	NaN
62	LFp5	121791	lh	-37.3866081237793	-46.1739807128906	47.1435050964355	1	face	-0.0731932518365198	0	0.467251848035332
62	LFp6	123123	lh	-37.4190788269043	-38.0588912963867	48.3186149597168	1	texture	0.621637232823819	0	NaN
62	LFp7	124350	lh	-42.3987922668457	-36.4262962341309	45.6697387695313	1	texture	0.0915769647285522	0	NaN
62	LFp8	124458	lh	-44.1390037536621	-36.0704727172852	46.8315124511719	1	texture	0.0870725060032625	0	NaN
62	LFp9	148152	lh	-51.7113037109375	-39.2823371887207	24.1859741210938	1	house	0.0212187732445015	0	NaN
62	LP1	189782	lh	-9.17089653015137	-75.262809753418	33.1648063659668	1	house	0.14390608749068	0	NaN
62	LP10	140432	lh	-47.043098449707	-61.5525093078613	29.0194625854492	1	house	-0.0230105979119165	0	NaN
62	LP11	145076	lh	-47.9918975830078	-49.0450057983398	23.4200630187988	1	house	-0.169031680916979	0	NaN
62	LP2	189229	lh	-10.5822143554688	-69.4211654663086	38.0645751953125	1	house	0.108562199856139	0	NaN
62	LP5	116146	lh	-26.5288944244385	-70.5248413085938	33.582462310791	0.190275946788229	house	1.05347741557258	0	NaN
62	LP6	117893	lh	-29.5695419311523	-69.7107543945313	29.7043800354004	0.444096610726087	house	0.432656489521991	0	NaN
62	LP7	178799	lh	-53.8125915527344	-71.2340698242188	17.8433685302734	1	face	0.195926623789366	0	0.2789838566583
62	LP8	178978	lh	-54.3840560913086	-62.5203704833984	22.1889476776123	1	house	0.502450177068315	0	NaN
62	LP9	179092	lh	-50.2612609863281	-63.1470565795898	24.181453704834	1	house	0.338770831628217	0	NaN
62	LTIa1	23177	lh	-19.9161796569824	3.47245287895203	-40.8391799926758	1	house	-0.338058953747588	0	NaN
62	LTIa10	23481	lh	-62.2251434326172	-3.77816295623779	-27.6720733642578	1	house	-0.230643331885963	0	NaN
62	LTIa2	24433	lh	-34.4143829345703	-0.850740194320679	-46.3194961547852	1	house	-0.173836435207114	0	NaN
62	LTIa3	24435	lh	-35.8295974731445	-1.0144134759903	-45.244930267334	1	texture	-0.159814138316604	0	NaN
62	LTIa4	24653	lh	-38.7621383666992	0.250921189785004	-42.4665145874023	1	tool	0.394912540284221	0	NaN
62	LTIa5	24231	lh	-42.8716926574707	9.30966758728027	-43.635669708252	1	face	-0.157329806920269	0	0.456724393110183
62	LTIa6	23688	lh	-42.735969543457	0.813751339912415	-33.634765625	1	face	-0.113919569441964	0	0.442964561996315
62	LTIa7	22993	lh	-45.1113357543945	0.722522795200348	-33.1148338317871	1	house	0.0827671370142883	0	NaN
62	LTIa8	22880	lh	-54.7913665771484	-4.67700576782227	-31.0610809326172	1	house	0.0500400318434984	0	NaN
62	LTIa9	23121	lh	-56.4522285461426	-4.61525297164917	-29.0083122253418	1	house	-0.235822787280151	0	NaN
62	LTIp10	172255	lh	-62.164176940918	-43.6488914489746	-14.8955698013306	1	house	-0.213082276467238	0	NaN
62	LTIp4	28312	lh	-38.0753707885742	-33.5126113891602	-19.5165119171143	1	face	0.105177251073703	0	0.0167229316869643
62	LTIp5	28442	lh	-43.0037384033203	-38.9045333862305	-26.2440547943115	1	house	0.446786287644036	0	NaN
62	LTIp6	28330	lh	-42.1521110534668	-45.8334007263184	-26.0269927978516	1	tool	-0.00627476589037983	0	NaN
62	LTIp7	26526	lh	-55.9079627990723	-25.6832580566406	-16.7187328338623	1	house	-0.0830850892173953	0	NaN
62	LTIp8	26860	lh	-55.8031845092773	-30.8345394134521	-18.2456111907959	1	house	0.674001664908128	0	NaN
62	LTIp9	171539	lh	-64.2071075439453	-32.3471832275391	-12.8633680343628	1	face	0.0775681648394579	0	0.174150490252453
62	LTSa1	1402	lh	-25.0135402679443	3.41103529930115	-17.8539924621582	1	face	-0.20142597195064	0	0.43785618380029
62	LTSa2	13682	lh	-41.7704467773438	7.29527378082275	-0.130750611424446	1	house	0.0874607216427059	0	NaN
62	LTSa3	13797	lh	-42.1159133911133	6.87745332717896	0.769693434238434	1	house	0.169707533367737	0	NaN
62	LTSa4	17653	lh	-47.6254348754883	-0.845219790935516	-7.97707986831665	1	house	0.245974470207524	0	NaN
62	LTSa5	18063	lh	-48.4468231201172	-0.676525354385376	-4.58102226257324	1	house	-0.140300754891799	0	NaN
62	LTSa6	18549	lh	-56.9177436828613	5.60641384124756	-3.83870482444763	1	tool	-0.136494785667981	0	NaN
62	LTSa7	18662	lh	-58.3867263793945	5.30575275421143	-4.17855405807495	1	house	-0.299020011852913	0	NaN
62	LTSa8	22142	lh	-59.5634841918945	4.75478458404541	-27.2416648864746	1	house	-0.301267524053772	0	NaN
62	LTSp1	14128	lh	-47.5929336547852	1.80899548530579	-2.80781650543213	1	house	0.133109123618256	0	NaN
62	LTSp2	14134	lh	-44.6026611328125	5.36936712265015	2.98867774009705	1	house	-0.206482776786381	0	NaN
62	LTSp3	17654	lh	-47.5964393615723	-2.05863928794861	-8.01677513122559	1	tool	0.160534016773319	0	NaN
62	LTSp4	18063	lh	-48.4468231201172	-0.676525354385376	-4.58102226257324	1	tool	-0.245997673586971	0	NaN
62	LTSp5	18372	lh	-54.216739654541	6.05575895309448	-3.58829092979431	1	tool	-0.268178866409964	0	NaN
62	LTSp6	18491	lh	-56.0545921325684	5.72664022445679	-3.57053446769714	1	house	-0.297338764027609	0	NaN
62	LTSp7	18548	lh	-57.0484466552734	6.14085674285889	-4.3948278427124	1	house	-0.279050854524086	0	NaN
62	LTo4	33710	lh	-27.3105010986328	-34.984790802002	-15.446457862854	1	house	0.000113781393199712	0	NaN
62	LTo5	28559	lh	-40.6677589416504	-41.1429443359375	-25.6635684967041	1	texture	-0.299152858105013	0	NaN
62	LTo6	28386	lh	-42.9491233825684	-41.7725715637207	-26.6152400970459	1	tool	-0.198371628361009	0	NaN
62	LTo7	169572	lh	-62.1659202575684	-24.3979415893555	-13.4350929260254	1	tool	0.110385284290959	0	NaN
62	LTo8	170259	lh	-68.2655029296875	-29.1384468078613	-12.9728984832764	1	tool	0.103378667140392	0	NaN
62	LTx1	20478	lh	-20.3090782165527	12.8291664123535	-32.219841003418	1	house	-0.206922366578484	0	NaN
62	LTx10	22264	lh	-58.1323509216309	-2.61515307426453	-34.3155784606934	1	house	-0.223374833334086	0	NaN
62	LTx2	13388	lh	-22.2227020263672	11.2241163253784	-30.3816986083984	1	house	-0.213153348711798	0	NaN
62	LTx3	13401	lh	-30.7189483642578	11.7563133239746	-27.9197406768799	1	texture	-0.297897753850516	0	NaN
62	LTx4	13175	lh	-33.6004447937012	9.52938556671143	-22.1782073974609	1	texture	-0.215870589217625	0	NaN
62	LTx5	14427	lh	-39.7344551086426	4.31694412231445	-20.3437023162842	1	texture	-0.160999791962761	0	NaN
62	LTx6	18292	lh	-49.6497535705566	11.6913576126099	-24.8952465057373	1	house	-0.0840850619204935	0	NaN
62	LTx7	18468	lh	-47.4679679870605	10.7899932861328	-26.8268527984619	1	texture	-0.165107480366469	0	NaN
62	LTx8	18743	lh	-49.6340713500977	8.31306838989258	-27.3090591430664	1	texture	0.0185314733185107	0	NaN
62	LTx9	21746	lh	-52.057861328125	5.90465974807739	-38.7273864746094	1	house	0.243302123960876	0	NaN
62	Lo1	150055	lh	-11.6712398529053	-91.2665176391602	-10.1901607513428	8.11498489855813e-17	texture	8.75516678737789	1	NaN
62	Lo10	177509	lh	-49.451301574707	-77.8386840820313	15.5108213424683	0.165026894689599	house	0.414142504404045	0	NaN
62	Lo2	149910	lh	-11.410701751709	-87.0226593017578	-15.2893972396851	9.81909119152707e-18	texture	8.22227883855668	1	NaN
62	Lo3	161495	lh	-23.0654640197754	-89.3787384033203	-18.1760311126709	5.43199250215608e-15	texture	4.92917070335092	1	NaN
62	Lo4	160976	lh	-19.837833404541	-89.0418548583984	-13.4818773269653	1.68168473170953e-12	texture	2.88583717456884	1	NaN
62	Lo5	160901	lh	-36.8868751525879	-88.1637878417969	4.23968124389648	5.41109916928946e-17	house	6.12921628693703	1	NaN
62	Lo6	159959	lh	-43.4341506958008	-87.3169250488281	3.33862400054932	4.37772026315259e-10	texture	2.25967586653541	1	NaN
62	Lo7	176516	lh	-49.7326507568359	-81.5048522949219	1.33353006839752	2.45523641511914e-18	house	4.87264809394383	1	NaN
62	Lo8	176594	lh	-50.1826210021973	-74.9310455322266	3.95089673995972	4.36510232362259e-14	face	2.5842277058904	1	0.0788332665855405
62	Lo9	177011	lh	-50.2220916748047	-74.3250961303711	7.1768741607666	0.000132267208044555	house	0.957884437439916	0	NaN
