# Supplementary material for: Human intracranial recordings link suppressed transients rather than 'filling-in' to perceptual continuity across blinks
Source: eLife journal article supplement (doi:10.7554/elife.17243), 2016-09-29

- Early sites
- High-order sites

P57

P20

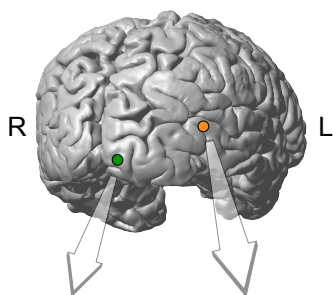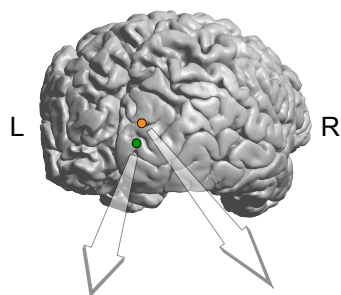

disappearance  
locked

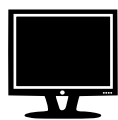

Gap

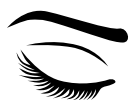

Voluntary  
blink

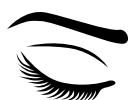

Spontaneous  
blink

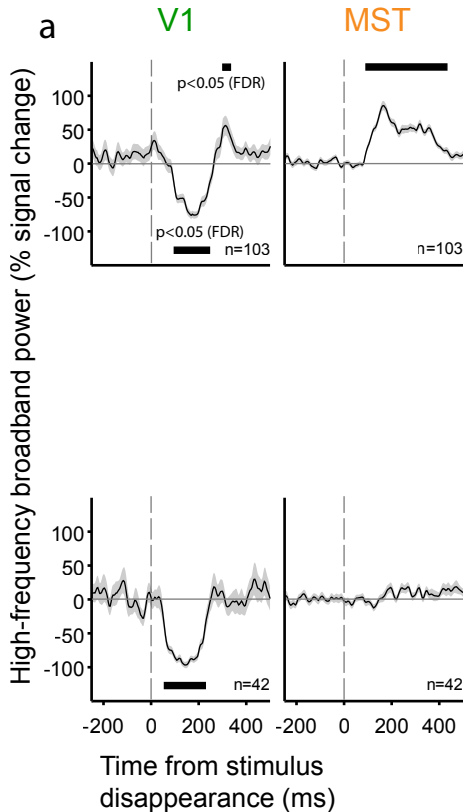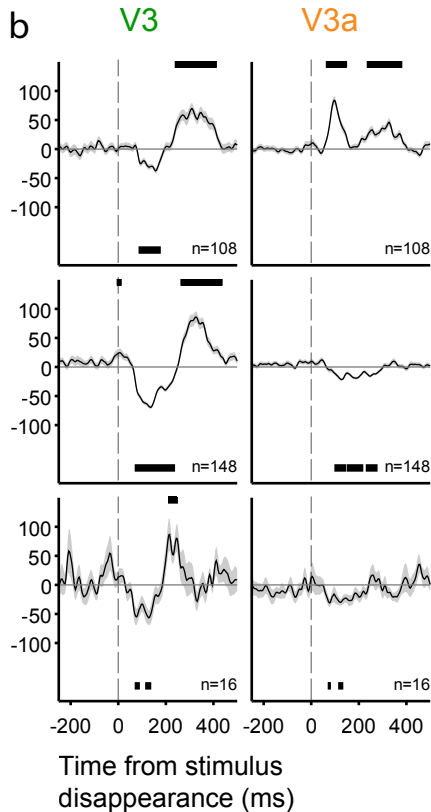

reappearance  
locked

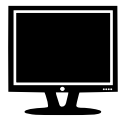

Gap

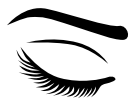

Voluntary  
blink

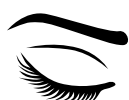

Spontaneous  
blink

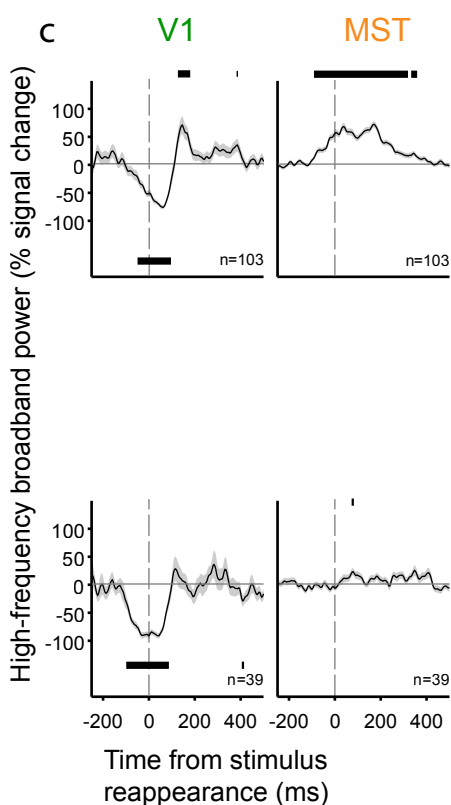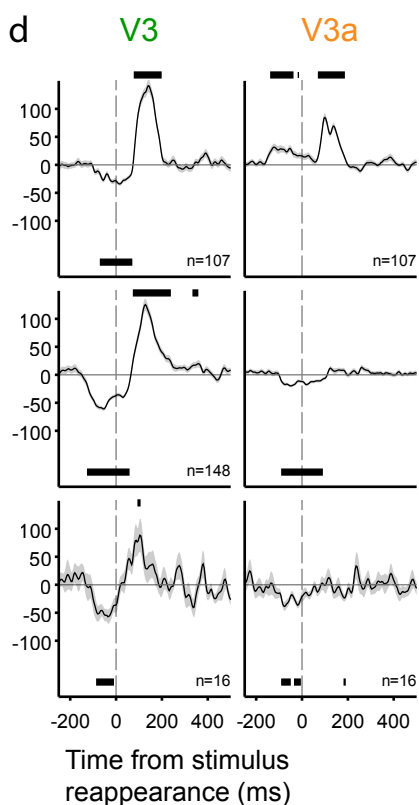

Supplement: supp [file elife-17243-supp-v1.zip › elife_poa_e17243_Figure_4_figure_supplement_1.pdf]
