# Supplementary material for: Human intracranial recordings link suppressed transients rather than 'filling-in' to perceptual continuity across blinks
Source: eLife journal article supplement (doi:10.7554/elife.17243), 2016-09-29

**a**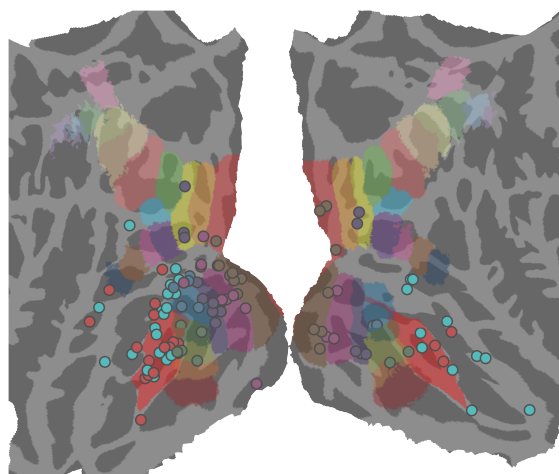

Parcellation of electrodes to ROIs

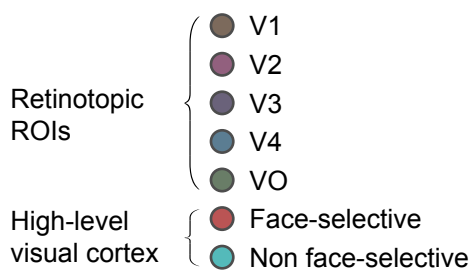**b**

disappearance locked

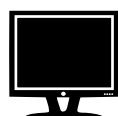

Gap

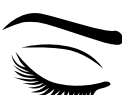

Voluntary blink

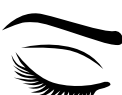

Spontaneous blink

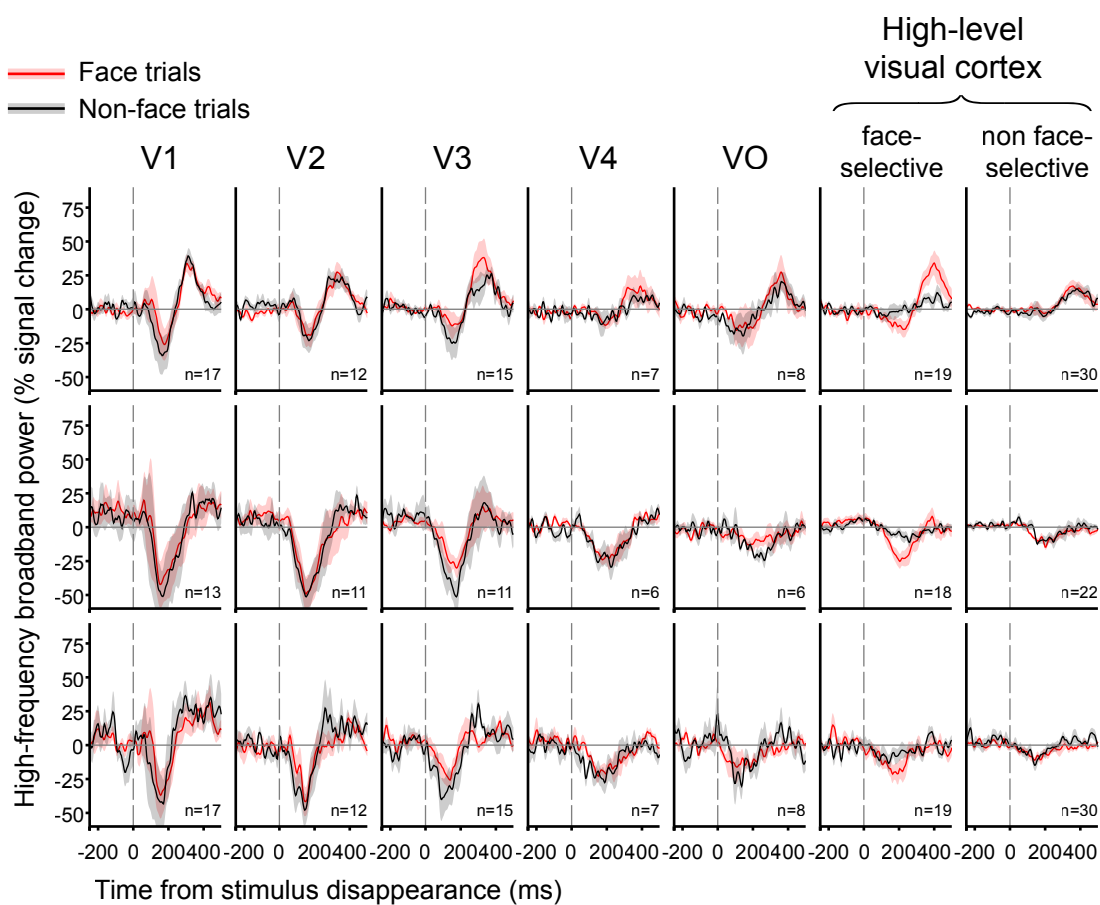**c**

reappearance locked

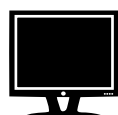

Gap

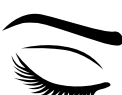

Voluntary blink

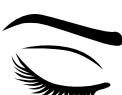

Spontaneous blink

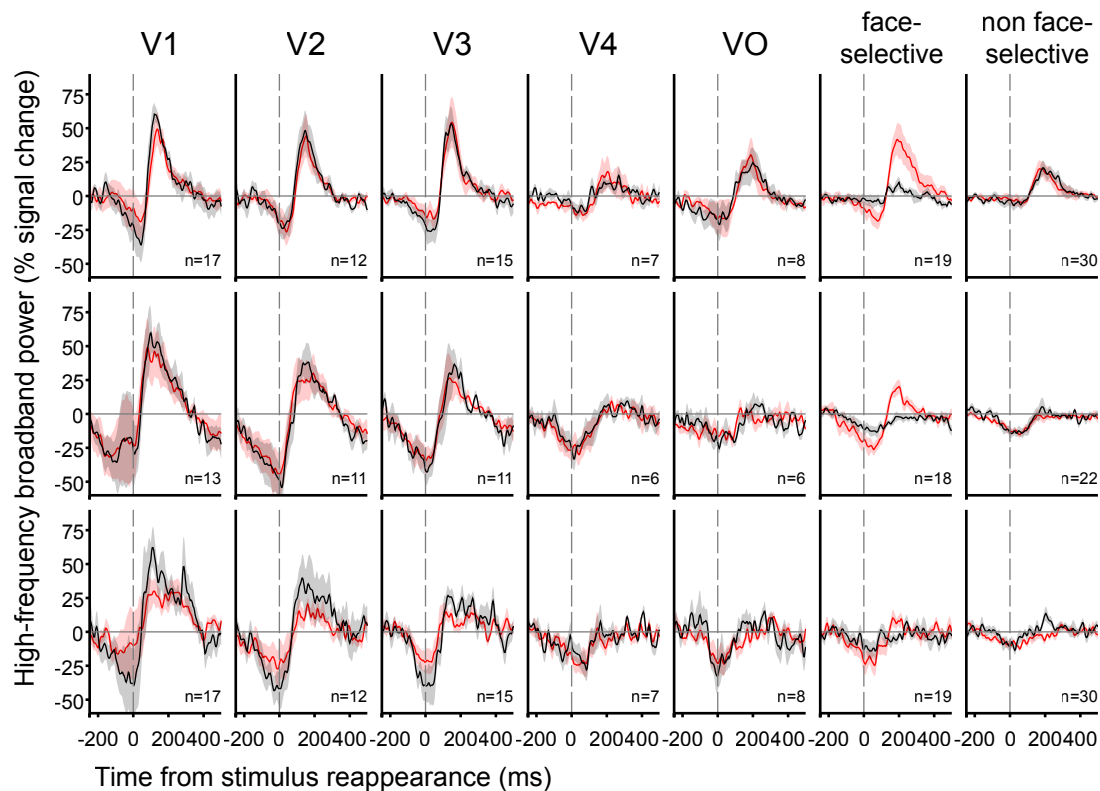

Supplement: supp [file elife-17243-supp-v1.zip › elife_poa_e17243_Figure_5_figure_supplement_1.pdf]
