# Supplementary material for: Human intracranial recordings link suppressed transients rather than 'filling-in' to perceptual continuity across blinks
Source: eLife journal article supplement (doi:10.7554/elife.17243), 2016-09-29
Supplement: supp [file elife-17243-supp-v1.zip › elife_poa_e17243_Figure_6_figure_supplement_1_source_data_1.csv]

patient_number	electrode_name	nearest_SUMA_std_141_node_index	nearest_SUMA_std_141_node_hemisphere	nearest_SUMA_std_141_node_MNI_X	nearest_SUMA_std_141_node_MNI_Y	nearest_SUMA_std_141_node_MNI_Z	region_of_interest	gap_overshoot_integral	vol_blink_overshoot_integral	gap_overshoot_gt_vol_blink_overshoot_pValue_FDR_corrected	gap_overshoot_lt_vol_blink_overshoot_pValue_FDR_corrected
20	RO 1	161991	rh	47.7749137878418	-81.7262802124023	-15.3635311126709	high-level non face-selective	8.19581931282685	4.53282823314261	0.00348212990279054	1
20	RPi 1	161928	rh	19.2331199645996	-101.65877532959	10.4136762619019	V3	11.759381223127	13.1221927847021	1	1
20	RPs 1	161811	rh	11.7966060638428	-99.9449310302734	14.9584159851074	V3	8.62821084184302	9.14375707649029	1	1
20	RPs 4	119269	rh	22.1793365478516	-69.2707595825195	50.2915420532227		5.5435942983491	1.83898692553281	0.00348212990279054	1
20	RTp 1	29536	rh	39.4828186035156	-62.6615524291992	-22.19140625	high-level non face-selective	3.19749822134856	0.0942066856256844	0.00348212990279054	1
20	RTp 2	29252	rh	39.1310653686523	-52.5467414855957	-24.911376953125	high-level face-selective	8.60484044821928	2.62938126960111	0.00348212990279054	1
25	Gd30	67857	rh	47.3532371520996	2.06860208511353	20.0702133178711	high-level face-selective	4.32542088244346	0.249358023583586	0.00348212990279054	1
25	RTa1	25926	rh	40.0383911132813	-19.5497665405273	-39.2428436279297	high-level non face-selective	2.40635335456335	0.934288511946336	0.251874062968516	1
25	RTa2	32360	rh	42.9231872558594	-3.66365385055542	-49.7164726257324	high-level non face-selective	9.1868107278701	0.274570508232983	0.00348212990279054	1
25	RTm1	28244	rh	35.3817558288574	-35.3888130187988	-23.9641342163086	high-level non face-selective	31.7879472413896	0.309613757583863	0.00348212990279054	1
25	RTm2	32775	rh	56.6741065979004	-40.1390953063965	-32.346492767334	high-level non face-selective	10.1046789999731	0.0116185462797246	0.00348212990279054	1
25	RTm3	33369	rh	63.6825370788574	-38.3509178161621	-24.8003921508789	high-level non face-selective	8.18969977547071	0.032659630221069	0.00348212990279054	1
25	RTp3	32918	rh	45.2245559692383	-53.8354454040527	-18.4796257019043	high-level face-selective	23.0066582119956	0.111903001051268	0.00348212990279054	1
25	RTp4	33287	rh	49.1007080078125	-57.6016616821289	-13.6021976470947	high-level non face-selective	3.97174410355034	-0.30888100787218	0.00348212990279054	1
32	LO1	164649	lh	-8.57319259643555	-103.711486816406	-11.529598236084	V1	8.79025954661899	9.18302262617541	1	1
32	LO2	163733	lh	-16.8428077697754	-97.7201538085938	-9.49905490875244	V1	1.65481434797387	1.06180107548373	1	1
32	LO3	162621	lh	-24.9631652832031	-103.111770629883	-1.67122209072113	V2	0.410414174296864	-0.208626182942576	1	1
32	LO4	160091	lh	-41.9392776489258	-89.7355651855469	0.876530528068542	high-level face-selective	0.717108068820816	0.550418660088931	1	1
32	LO5	175306	lh	-41.9683990478516	-79.2954635620117	-4.8663215637207		0.419335802042109	0.203773757787075	1	1
32	LO6	175045	lh	-47.2029037475586	-72.4848403930664	-1.82617437839508		0.40352568898978	-0.0950803957145893	0.15796979559001	1
32	LTp1	160611	lh	-25.8097133636475	-95.5291061401367	-6.26489973068237	V2	0.696381167209721	0.104355151706458	1	1
32	LTp2	159654	lh	-26.0671901702881	-91.6724548339844	-6.01988124847412	V4	1.18461483601321	1.18167217776563	1	1
32	LTp3	171964	lh	-31.6100692749023	-81.5457229614258	-13.8575916290283	high-level non face-selective	1.57637878719162	-0.279964155582622	0.00654218345372768	1
32	LTp4	20429	lh	-41.0335388183594	-74.4832916259766	-19.9485397338867	high-level non face-selective	0.969388418066352	0.428135977805065	1	1
33	LOi1	37340	lh	-12.3291110992432	-56.7717132568359	-5.66883516311646		4.63481775288572	4.82558584083203	1	1
33	LOi2	32286	lh	-26.6301651000977	-47.2773132324219	-11.0855169296265		3.58151875847759	3.36632906063508	1	1
33	LOi5	28996	lh	-43.0576324462891	-50.5888442993164	-12.9593296051025	high-level non face-selective	0.667247049288553	0.731641493657895	1	1
33	LOi7	176249	lh	-44.3088455200195	-64.1254119873047	-2.6825840473175	high-level face-selective	5.95476435065089	0.089585895081199	0.00348212990279054	1
33	LOi8	173918	lh	-58.3025131225586	-42.717227935791	-12.8630847930908	high-level face-selective	1.28531556274383	-0.194300325663473	0.00348212990279054	1
33	LOp11	172906	lh	-31.5387210845947	-78.9289855957031	-2.54530048370361		2.31750000459921	-0.0918659159868526	0.00348212990279054	1
33	LOp12	172903	lh	-31.100757598877	-81.3187942504883	-2.01946616172791	high-level face-selective	4.68360498809772	0.760782220023212	0.00348212990279054	1
33	LOp9	29230	lh	-41.9235153198242	-57.8151359558105	-11.9728593826294	high-level face-selective	2.68442261079831	-0.0145263376551998	0.00348212990279054	1
39	LOi1	166006	lh	-7.78852081298828	-93.4660034179688	-3.81165337562561	V1	10.0322456486882	5.78936608204082	0.00348212990279054	1
39	LOi2	150199	lh	-11.5933513641357	-89.462287902832	-14.981348991394	V2	9.53766911998095	11.4637365195736	1	1
39	LOi3	163379	lh	-12.468358039856	-90.1327514648438	-13.9369201660156	V2	8.61878948216032	9.31787153416869	1	1
39	LOi4	162346	lh	-17.3489151000977	-86.3455352783203	-13.8438701629639	V3	5.17660717810421	1.78938789449555	0.593703148425787	1
39	LOi5	169488	lh	-24.0754852294922	-76.9243240356445	-15.2306022644043	VO	2.18248689003845	-0.391960895684624	0.00348212990279054	1
39	LOi6	171352	lh	-32.3444900512695	-83.2944259643555	-16.2854690551758	high-level non face-selective	0.104946508582315	-0.135856475387775	0.977511244377811	1
39	LTm3	30672	lh	-30.6809310913086	-27.1095523834229	-31.66796875	high-level face-selective	1.27382395072776	1.3551185333313	1	1
39	LTo1	29907	lh	-31.245002746582	-60.7756729125977	-18.5349578857422	VO	4.11149521351588	0.149079094128508	0.00348212990279054	1
39	LTo2	29843	lh	-36.0393600463867	-63.0404739379883	-18.0175247192383	high-level face-selective	4.27604814844979	2.90586480118654	0.141160189136201	1
39	LTo3	170326	lh	-41.4206771850586	-82.5858306884766	-16.7787971496582	high-level non face-selective	0.696195455301231	0.0167540785316744	0.952831276669358	1
39	LTp1	30846	lh	-26.5291137695313	-53.4649353027344	-16.797492980957		4.58111318209091	0.867750546254671	0.00348212990279054	1
39	LTp2	29288	lh	-30.0919723510742	-45.8408508300781	-20.6184692382813	high-level face-selective	4.6453359090483	2.33546116911657	0.0380985977599436	1
39	Lo1	165214	lh	-3.67326498031616	-98.0435104370117	-10.7547168731689	V1	2.83605933107009	6.74271979852791	1	0.16191904047976
39	Lo2	164543	lh	-8.61940002441406	-100.320945739746	-17.8656349182129	V1	0.309217176522102	6.15789178067172	1	0.179910044977511
39	Lo3	161639	lh	-26.0745677947998	-97.0890960693359	-8.36031055450439	V3	0.222384474306619	5.91313253797557	1	0.377811094452774
39	Lo4	161006	lh	-26.1350212097168	-96.4684753417969	-5.93913650512695	V4	-0.0948116793359397	3.28709772064039	1	0.16191904047976
39	Lo5	160482	lh	-31.0037460327148	-96.8059234619141	-9.30291748046875	high-level non face-selective	0.106940774092412	0.661399790889576	1	0.95352323838081
39	Lo6	159658	lh	-30.7553749084473	-91.8832397460938	-9.56667423248291	high-level non face-selective	2.8210924093864	2.15192749052961	0.687569258848836	1
44	RDp5	27147	rh	28.9449195861816	-40.2492904663086	-11.8683929443359		-0.235914818141569	0.0923351592753233	1	1
44	RGRd1	163669	rh	27.5008869171143	-96.8515396118164	12.8250970840454		5.02238027219563	5.62762474298643	1	1
44	RGRd10	166369	rh	42.0172805786133	-83.6575317382813	27.9142532348633		0.00509563383323658	0.369274901626977	1	1
44	RGRd2	164882	rh	33.8336486816406	-92.6221618652344	13.7517242431641		-0.262917052224764	-0.627795333980954	1	1
44	RTp1	174417	rh	5.45850515365601	-77.7909851074219	5.82874536514282	V1	1.03804461750345	15.7346024751888	1	0.0539730134932534
44	RTp2	172491	rh	7.9818229675293	-67.9663848876953	4.38884925842285	V2	9.44657267735695	13.2303491163189	1	0.637862886738449
44	RTp3	170241	rh	12.3425245285034	-61.9919815063477	-9.18651485443115	V3	1.64599268593268	1.5816150069368	1	1
44	RTp4	28390	rh	22.9414978027344	-54.7701454162598	-16.3749980926514	VO	0.481690951017505	-0.11427542564716	0.837132454181073	1
44	RTp5	28883	rh	30.7460956573486	-53.3333053588867	-19.4473857879639	high-level non face-selective	-0.19972462373549	-0.108062314883116	1	1
44	RTp6	28547	rh	34.9668884277344	-41.7083473205566	-25.3127002716064	high-level face-selective	1.5256659058657	0.362365300802547	0.935532233883059	1
46	LTo3	33621	lh	-29.6992073059082	-57.6397247314453	-6.97321462631226	VO	11.2465902913859	0.271248906517536	0.00348212990279054	1
46	LTo4	29660	lh	-31.8278503417969	-55.1594200134277	-18.3946571350098	high-level non face-selective	9.69502312764395	0.129132231088987	0.00348212990279054	1
46	LTo5	29699	lh	-34.8537864685059	-59.8440971374512	-20.5088329315186	high-level non face-selective	4.93024422107269	1.48894723779178	0.00348212990279054	1
46	LTp1	152268	lh	-5.14335346221924	-82.8364791870117	-6.89189672470093	V2	9.54769047102843	5.4190737210646	0.602098950524738	1
46	LTp2	151121	lh	-7.42327165603638	-82.9405517578125	-12.9436912536621	V3	17.0723807993973	4.25805431925365	0.00348212990279054	1
46	LTp3	152241	lh	-20.2469482421875	-80.8248748779297	-13.8947200775146	V3	21.1032746932609	5.57952935467274	0.00348212990279054	1
46	LTp4	32564	lh	-23.443941116333	-72.5714263916016	-5.21790790557861	VO	14.8626655836808	3.59097481308152	0.00348212990279054	1
46	LTp5	29891	lh	-34.8834800720215	-63.3001174926758	-17.1682376861572	high-level face-selective	12.3682311867877	3.52454716563479	0.00348212990279054	1
46	Lo1	150340	lh	-8.82609748840332	-88.8627624511719	-18.0892467498779	V1	9.98483503815497	7.10373645116686	0.700500813423076	1
46	Lo2	164246	lh	-12.3446636199951	-103.278701782227	-15.8018579483032	V1	2.38978745329544	0.986313628068359	0.977511244377811	1
46	Lo3	163626	lh	-17.2319431304932	-97.3388824462891	-9.04483127593994	V1	4.92611632357593	4.6890020362587	1	1
46	Lo4	162502	lh	-24.7183437347412	-102.999008178711	-3.4878363609314	V2	3.90637081520734	0.167937272030382	0.0462625829942172	1
46	Lo5	161268	lh	-30.3907337188721	-99.7427520751953	-5.11005020141602	V4	10.3510175836685	2.1270957881363	0.00348212990279054	1
46	Lo6	173543	lh	-25.638916015625	-89.6457366943359	-6.37780904769897	high-level non face-selective	10.6799805184612	1.08854420917905	0.00348212990279054	1
46	Lo7	171725	lh	-31.6579322814941	-80.3314514160156	-13.4243383407593	high-level non face-selective	5.1061347681328	-0.220051867452607	0.00348212990279054	1
47	LOa5	29243	lh	-27.1480255126953	-45.1569290161133	-20.2510299682617	high-level non face-selective	0.852537060257417	0.126303684047872	0.593703148425787	1
47	LOa6	29019	lh	-28.8947372436523	-40.4390487670898	-24.03000831604	high-level face-selective	1.01418847452533	-0.223644306377595	0.0599700149925037	1
47	LOp1	162798	lh	-39.3736801147461	-84.8955917358398	26.5311336517334	high-level non face-selective	1.7717559872366	0.169427590554241	0.00654218345372768	1
47	LTo1	171953	lh	-28.4263877868652	-86.1893310546875	-16.2182102203369	V4	2.41309541412984	0.626817810718995	0.0729365047206127	1
47	LTo2	20289	lh	-30.2239418029785	-60.6701202392578	-19.092887878418	VO	-0.0906698177335481	-0.247054302341775	1	1
47	LTo3	29380	lh	-38.1099090576172	-52.4391403198242	-24.0671920776367	high-level face-selective	3.51887244928682	0.923726024437653	0.00348212990279054	1
47	Lo3	29159	lh	-30.7102699279785	-44.479377746582	-22.5373840332031	high-level face-selective	0.862473066938445	-0.197788297871211	0.0880612325416239	1
50	RGRD41	173985	rh	16.1601810455322	-89.0553131103516	-6.43066453933716	V2	3.28740361232621	7.72056720785258	1	0.0719640179910045
50	RGRD49	174682	rh	10.7595252990723	-90.1856842041016	-13.9797191619873	V1	6.23147923266607	12.7462792820298	1	0.107946026986507
50	RGRD57	176440	rh	19.8774108886719	-104.481842041016	-7.61479902267456	V1	12.2157294312521	16.5667297533417	1	1
54	LOp3	157484	lh	-19.894287109375	-53.8827133178711	0.16510184109211	V2	6.29934291912571	7.31303391379226	1	1
54	LOp4	36089	lh	-20.0978374481201	-49.4684791564941	-8.14456939697266		2.49782879906791	3.21849189324692	1	1
54	LOp5	35811	lh	-24.5516471862793	-47.8083343505859	-9.80695915222168		2.43181578015531	2.29849808944502	1	1
54	LPm10	35717	lh	-25.3975143432617	-48.8231430053711	-9.53130626678467		5.14333942081943	4.54020469817471	1	1
54	LPm11	35816	lh	-21.7714900970459	-51.1409530639648	-11.945273399353		4.28510852029591	4.57387606095619	1	1
54	LPm12	36006	lh	-17.8238563537598	-55.272590637207	-12.3338680267334		2.54635600577018	3.37577283283536	1	1
54	LPm8	36350	lh	-22.4828701019287	-47.4322128295898	-6.22165012359619		0.624559712392417	3.78210651163757	1	0.0539730134932534
54	LPm9	36351	lh	-21.9551849365234	-48.1684417724609	-6.39898443222046		2.27948422576522	3.05080932326819	1	1
54	LPs10	164376	lh	-14.4045906066895	-106.265632629395	2.01106238365173	V2	0.860727056176715	4.91942750597475	1	0.125937031484258
54	LPs6	166307	lh	-25.4402160644531	-85.2358322143555	23.3632507324219		2.06030165751425	2.16840070067165	1	1
54	LPs7	166304	lh	-26.9347820281982	-88.7685852050781	26.6192111968994		2.44096979268642	1.29412754316537	1	1
54	LPs8	164082	lh	-15.2446689605713	-95.0164642333984	2.99157309532166	V3	1.07119971437507	0.302670148057502	0.807346326836582	1
54	LPs9	163656	lh	-17.5705146789551	-93.4009094238281	3.14606666564941	V3	-0.143078100698771	0.487226022608527	1	1
54	LTp2	36768	lh	-16.6813793182373	-38.2845649719238	-10.9148826599121		-0.0304219660865303	0.531294988450751	1	1
54	LTp5	30032	lh	-31.8092060089111	-64.8326568603516	-19.5307083129883	high-level face-selective	2.23007266910217	1.35230144138731	0.935532233883059	1
54	LTp6	30000	lh	-34.6846694946289	-65.46435546875	-18.1905250549316	high-level face-selective	2.07493062102563	0.296758926075556	0.156521739130435	1
54	ROp1	173716	rh	5.7391562461853	-67.9534759521484	13.2326030731201	V1	6.50131541576091	9.07082532689063	1	1
54	ROp2	173170	rh	3.40024065971375	-65.6079711914063	2.66212868690491	V2	7.21806447222027	6.45665386961152	1	1
54	ROp3	173914	rh	1.15432262420654	-74.3446197509766	5.03138160705566	V1	10.7378442390648	11.5907619033866	1	1
54	ROp4	169695	rh	18.0199966430664	-64.1510696411133	-12.7060089111328	V3	6.40447203414194	7.54330486044091	1	1
54	ROp5	27553	rh	22.965503692627	-62.8042526245117	-11.6194467544556	V3	2.03537885337863	2.64928095935488	1	1
54	ROp6	169942	rh	25.1434116363525	-76.3084869384766	-6.18148136138916	V4	1.8445781829208	3.88715317831031	1	0.107946026986507
54	RPm10	169803	rh	26.4898414611816	-76.7260513305664	-5.60140609741211	V4	0.681709417127085	1.27501458444605	1	1
