# Supplementary material for: Human intracranial recordings link suppressed transients rather than 'filling-in' to perceptual continuity across blinks
Source: eLife journal article supplement (doi:10.7554/elife.17243), 2016-09-29
Supplement: supp [file elife-17243-supp-v1.zip › elife_poa_e17243_Figure_6_source_data_1.csv]

patient_number	electrode_name	nearest_SUMA_std_141_node_index	nearest_SUMA_std_141_node_hemisphere	nearest_SUMA_std_141_node_MNI_X	nearest_SUMA_std_141_node_MNI_Y	nearest_SUMA_std_141_node_MNI_Z	region_of_interest	gap_overshoot_integral	spon_blink_overshoot_integral	gap_overshoot_gt_spon_blink_overshoot_pValue_FDR_corrected	gap_overshoot_lt_spon_blink_overshoot_pValue_FDR_corrected
20	RO 1	161991	rh	47.7749137878418	-81.7262802124023	-15.3635311126709	high-level non face-selective	8.19581931282685	1.46022645303803	0.00420378046270982	1
20	RPi 1	161928	rh	19.2331199645996	-101.65877532959	10.4136762619019	V3	11.759381223127	5.24096453008216	0.0400199900049975	1
20	RPs 1	161811	rh	11.7966060638428	-99.9449310302734	14.9584159851074	V3	8.62821084184302	3.95109961329543	0.233883058470765	1
20	RPs 4	119269	rh	22.1793365478516	-69.2707595825195	50.2915420532227		5.5435942983491	1.11919374454504	0.289720004862434	1
20	RTp 1	29536	rh	39.4828186035156	-62.6615524291992	-22.19140625	high-level non face-selective	3.19749822134856	-0.289090647830716	0.00732966849908379	1
20	RTp 2	29252	rh	39.1310653686523	-52.5467414855957	-24.911376953125	high-level face-selective	8.60484044821928	0.620680167047479	0.00420378046270982	1
25	Gd30	67857	rh	47.3532371520996	2.06860208511353	20.0702133178711	high-level face-selective	4.32542088244346	0.360139699234389	0.0129935032483758	1
25	RTa1	25926	rh	40.0383911132813	-19.5497665405273	-39.2428436279297	high-level non face-selective	2.40635335456335	-0.500340922891223	0.00732966849908379	1
25	RTa2	32360	rh	42.9231872558594	-3.66365385055542	-49.7164726257324	high-level non face-selective	9.1868107278701	-0.349156196450962	0.00420378046270982	1
25	RTm1	28244	rh	35.3817558288574	-35.3888130187988	-23.9641342163086	high-level non face-selective	31.7879472413896	-0.141049324223656	0.00420378046270982	1
25	RTm2	32775	rh	56.6741065979004	-40.1390953063965	-32.346492767334	high-level non face-selective	10.1046789999731	-0.256046280136273	0.00732966849908379	1
25	RTm3	33369	rh	63.6825370788574	-38.3509178161621	-24.8003921508789	high-level non face-selective	8.18969977547071	-0.440460585151278	0.00420378046270982	1
25	RTp3	32918	rh	45.2245559692383	-53.8354454040527	-18.4796257019043	high-level face-selective	23.0066582119956	-3.51976433585778	0.00420378046270982	1
25	RTp4	33287	rh	49.1007080078125	-57.6016616821289	-13.6021976470947	high-level non face-selective	3.97174410355034	-0.58241363753504	0.00420378046270982	1
32	LO1	164649	lh	-8.57319259643555	-103.711486816406	-11.529598236084	V1	8.79025954661899	10.0750624261655	1	1
32	LO2	163733	lh	-16.8428077697754	-97.7201538085938	-9.49905490875244	V1	1.65481434797387	-0.0678026503502473	0.919256161392988	1
32	LO3	162621	lh	-24.9631652832031	-103.111770629883	-1.67122209072113	V2	0.410414174296864	0.213273558204376	0.547311709998659	1
32	LO4	160091	lh	-41.9392776489258	-89.7355651855469	0.876530528068542	high-level face-selective	0.717108068820816	-0.98097334418427	0.289720004862434	1
32	LO5	175306	lh	-41.9683990478516	-79.2954635620117	-4.8663215637207		0.419335802042109	-0.623462899327146	0.0782061799289035	1
32	LO6	175045	lh	-47.2029037475586	-72.4848403930664	-1.82617437839508		0.40352568898978	0.830255595567261	1	1
32	LTp1	160611	lh	-25.8097133636475	-95.5291061401367	-6.26489973068237	V2	0.696381167209721	0.125229776156336	0.696977354019619	1
32	LTp2	159654	lh	-26.0671901702881	-91.6724548339844	-6.01988124847412	V4	1.18461483601321	0.16703063431251	0.633930093776641	1
32	LTp3	171964	lh	-31.6100692749023	-81.5457229614258	-13.8575916290283	high-level non face-selective	1.57637878719162	0.106715747800836	0.953348068233924	1
32	LTp4	20429	lh	-41.0335388183594	-74.4832916259766	-19.9485397338867	high-level non face-selective	0.969388418066352	-0.26285215496569	0.42136074819733	1
33	LOi1	37340	lh	-12.3291110992432	-56.7717132568359	-5.66883516311646		4.63481775288572	3.40825728845548	0.1821186181103	1
33	LOi2	32286	lh	-26.6301651000977	-47.2773132324219	-11.0855169296265		3.58151875847759	2.36596326786313	0.0420378046270982	1
33	LOi5	28996	lh	-43.0576324462891	-50.5888442993164	-12.9593296051025	high-level non face-selective	0.667247049288553	-0.0374797584410592	0.277571359247912	1
33	LOi7	176249	lh	-44.3088455200195	-64.1254119873047	-2.6825840473175	high-level face-selective	5.95476435065089	0.133915477869499	0.00420378046270982	1
33	LOi8	173918	lh	-58.3025131225586	-42.717227935791	-12.8630847930908	high-level face-selective	1.28531556274383	-0.148648431520599	0.00420378046270982	1
33	LOp11	172906	lh	-31.5387210845947	-78.9289855957031	-2.54530048370361		2.31750000459921	0.05828765773574	0.00420378046270982	1
33	LOp12	172903	lh	-31.100757598877	-81.3187942504883	-2.01946616172791	high-level face-selective	4.68360498809772	-0.0763729317556042	0.00420378046270982	1
33	LOp9	29230	lh	-41.9235153198242	-57.8151359558105	-11.9728593826294	high-level face-selective	2.68442261079831	0.036053487486545	0.00420378046270982	1
36	LTp1	150313	lh	-16.6526432037354	-85.4105453491211	-9.78670120239258	V3	1.9610270787446	-0.535044054340235	0.425167163253816	1
36	LTp2	30856	lh	-26.4382019042969	-63.273307800293	-16.5444259643555	VO	3.73225230693564	0.0718200044311604	0.133238465513006	1
36	LTp3	29781	lh	-32.9583587646484	-58.1756553649902	-17.8483905792236	high-level non face-selective	3.46303886331792	0.159714602759408	0.0129935032483758	1
36	LTp4	29207	lh	-33.3025932312012	-45.5736236572266	-24.4988212585449	high-level non face-selective	2.83513495313003	0.0503179887342713	0.0400199900049975	1
36	LTp5	27895	lh	-57.0867576599121	-47.9971733093262	-26.1931343078613	high-level non face-selective	0.546462285194928	-0.106014575585891	0.801987894941418	1
36	Lo1	173758	lh	-26.2549304962158	-88.0010299682617	-5.78820943832397	high-level non face-selective	0.250894554617516	-1.09721418755249	0.127883426707699	1
36	Lo2	171854	lh	-32.4921836853027	-79.7351684570313	-7.71273469924927	high-level face-selective	1.28538654081045	0.850272155978433	1	1
36	Lo3	172569	lh	-36.6179275512695	-78.6545867919922	-3.3546769618988		2.35999788930169	1.11224545739733	0.658136048254942	1
39	LOi1	166006	lh	-7.78852081298828	-93.4660034179688	-3.81165337562561	V1	10.0322456486882	10.0352084191958	1	1
39	LOi2	150199	lh	-11.5933513641357	-89.462287902832	-14.981348991394	V2	9.53766911998095	14.281886266417	1	1
39	LOi3	163379	lh	-12.468358039856	-90.1327514648438	-13.9369201660156	V2	8.61878948216032	3.79421199036821	0.59582257064239	1
39	LOi4	162346	lh	-17.3489151000977	-86.3455352783203	-13.8438701629639	V3	5.17660717810421	6.54520987908915	1	1
39	LOi5	169488	lh	-24.0754852294922	-76.9243240356445	-15.2306022644043	VO	2.18248689003845	0.248554692412893	0.0155357104056667	1
39	LOi6	171352	lh	-32.3444900512695	-83.2944259643555	-16.2854690551758	high-level non face-selective	0.104946508582315	0.0259885573338687	1	1
39	LTm3	30672	lh	-30.6809310913086	-27.1095523834229	-31.66796875	high-level face-selective	1.27382395072776	0.563372982370606	1	1
39	LTo1	29907	lh	-31.245002746582	-60.7756729125977	-18.5349578857422	VO	4.11149521351588	-0.0275514898944192	0.00420378046270982	1
39	LTo2	29843	lh	-36.0393600463867	-63.0404739379883	-18.0175247192383	high-level face-selective	4.27604814844979	0.142827255551155	0.130607110237984	1
39	LTo3	170326	lh	-41.4206771850586	-82.5858306884766	-16.7787971496582	high-level non face-selective	0.696195455301231	0.298756297043425	1	1
39	LTp1	30846	lh	-26.5291137695313	-53.4649353027344	-16.797492980957		4.58111318209091	-0.0961514424449317	0.00420378046270982	1
39	LTp2	29288	lh	-30.0919723510742	-45.8408508300781	-20.6184692382813	high-level face-selective	4.6453359090483	-0.462047079511295	0.00420378046270982	1
39	Lo1	165214	lh	-3.67326498031616	-98.0435104370117	-10.7547168731689	V1	2.83605933107009	5.19005273765107	1	1
39	Lo2	164543	lh	-8.61940002441406	-100.320945739746	-17.8656349182129	V1	0.309217176522102	4.59714628222254	1	1
39	Lo3	161639	lh	-26.0745677947998	-97.0890960693359	-8.36031055450439	V3	0.222384474306619	2.18751308455994	1	1
39	Lo4	161006	lh	-26.1350212097168	-96.4684753417969	-5.93913650512695	V4	-0.0948116793359397	1.17177846853906	1	1
39	Lo5	160482	lh	-31.0037460327148	-96.8059234619141	-9.30291748046875	high-level non face-selective	0.106940774092412	0.215283699193482	1	1
39	Lo6	159658	lh	-30.7553749084473	-91.8832397460938	-9.56667423248291	high-level non face-selective	2.8210924093864	0.50472721208421	0.00732966849908379	1
44	RDp5	27147	rh	28.9449195861816	-40.2492904663086	-11.8683929443359		-0.235914818141569	0.72619083991567	1	0.771814092953523
44	RGRd1	163669	rh	27.5008869171143	-96.8515396118164	12.8250970840454		5.02238027219563	2.52594579526172	1	1
44	RGRd10	166369	rh	42.0172805786133	-83.6575317382813	27.9142532348633		0.00509563383323658	0.0747516993633914	1	1
44	RGRd2	164882	rh	33.8336486816406	-92.6221618652344	13.7517242431641		-0.262917052224764	-0.36105400567423	1	1
44	RTp1	174417	rh	5.45850515365601	-77.7909851074219	5.82874536514282	V1	1.03804461750345	14.2373386378449	1	0.285857071464268
44	RTp2	172491	rh	7.9818229675293	-67.9663848876953	4.38884925842285	V2	9.44657267735695	4.0748994353178	0.529364947156052	1
44	RTp3	170241	rh	12.3425245285034	-61.9919815063477	-9.18651485443115	V3	1.64599268593268	0.659226995004341	1	1
44	RTp4	28390	rh	22.9414978027344	-54.7701454162598	-16.3749980926514	VO	0.481690951017505	0.82595971597964	1	1
44	RTp5	28883	rh	30.7460956573486	-53.3333053588867	-19.4473857879639	high-level non face-selective	-0.19972462373549	0.498291938675354	1	1
44	RTp6	28547	rh	34.9668884277344	-41.7083473205566	-25.3127002716064	high-level face-selective	1.5256659058657	1.53513837202202	1	1
46	LTo3	33621	lh	-29.6992073059082	-57.6397247314453	-6.97321462631226	VO	11.2465902913859	-0.242433236041215	0.00420378046270982	1
46	LTo4	29660	lh	-31.8278503417969	-55.1594200134277	-18.3946571350098	high-level non face-selective	9.69502312764395	0.0475157939374553	0.00420378046270982	1
46	LTo5	29699	lh	-34.8537864685059	-59.8440971374512	-20.5088329315186	high-level non face-selective	4.93024422107269	0.596057777125935	0.0155357104056667	1
46	LTp1	152268	lh	-5.14335346221924	-82.8364791870117	-6.89189672470093	V2	9.54769047102843	2.39637743924719	0.145310677994336	1
46	LTp2	151121	lh	-7.42327165603638	-82.9405517578125	-12.9436912536621	V3	17.0723807993973	0.409980239324609	0.00420378046270982	1
46	LTp3	152241	lh	-20.2469482421875	-80.8248748779297	-13.8947200775146	V3	21.1032746932609	1.55177382066576	0.00420378046270982	1
46	LTp4	32564	lh	-23.443941116333	-72.5714263916016	-5.21790790557861	VO	14.8626655836808	0.969865383185279	0.00420378046270982	1
46	LTp5	29891	lh	-34.8834800720215	-63.3001174926758	-17.1682376861572	high-level face-selective	12.3682311867877	-0.155995830794125	0.00420378046270982	1
46	Lo1	150340	lh	-8.82609748840332	-88.8627624511719	-18.0892467498779	V1	9.98483503815497	1.07674693869864	0.258532498456654	1
46	Lo2	164246	lh	-12.3446636199951	-103.278701782227	-15.8018579483032	V1	2.38978745329544	0.0311475124416149	0.460944527736132	1
46	Lo3	163626	lh	-17.2319431304932	-97.3388824462891	-9.04483127593994	V1	4.92611632357593	0.644240062105156	0.0742128935532234	1
46	Lo4	162502	lh	-24.7183437347412	-102.999008178711	-3.4878363609314	V2	3.90637081520734	-0.505913351043715	0.204497751124438	1
46	Lo5	161268	lh	-30.3907337188721	-99.7427520751953	-5.11005020141602	V4	10.3510175836685	-0.43133271833748	0.00420378046270982	1
46	Lo6	173543	lh	-25.638916015625	-89.6457366943359	-6.37780904769897	high-level non face-selective	10.6799805184612	0.678974242648101	0.00420378046270982	1
46	Lo7	171725	lh	-31.6579322814941	-80.3314514160156	-13.4243383407593	high-level non face-selective	5.1061347681328	-0.533382740184449	0.00420378046270982	1
47	LOa5	29243	lh	-27.1480255126953	-45.1569290161133	-20.2510299682617	high-level non face-selective	0.852537060257417	-0.0215653472825426	0.287842190016103	1
47	LOa6	29019	lh	-28.8947372436523	-40.4390487670898	-24.03000831604	high-level face-selective	1.01418847452533	-0.31995671424522	0.00420378046270982	1
47	LOp1	162798	lh	-39.3736801147461	-84.8955917358398	26.5311336517334	high-level non face-selective	1.7717559872366	-0.237567616572357	0.00732966849908379	1
47	LTo1	171953	lh	-28.4263877868652	-86.1893310546875	-16.2182102203369	V4	2.41309541412984	-0.0266221275804781	0.00420378046270982	1
47	LTo2	20289	lh	-30.2239418029785	-60.6701202392578	-19.092887878418	VO	-0.0906698177335481	-0.240141179349254	1	1
47	LTo3	29380	lh	-38.1099090576172	-52.4391403198242	-24.0671920776367	high-level face-selective	3.51887244928682	1.37210279881989	0.0846983915449683	1
47	Lo3	29159	lh	-30.7102699279785	-44.479377746582	-22.5373840332031	high-level face-selective	0.862473066938445	-0.0463608063790884	0.127614764046548	1
50	RGRD41	173985	rh	16.1601810455322	-89.0553131103516	-6.43066453933716	V2	3.28740361232621	6.19747098932939	1	1
50	RGRD49	174682	rh	10.7595252990723	-90.1856842041016	-13.9797191619873	V1	6.23147923266607	11.0975025987548	1	1
50	RGRD57	176440	rh	19.8774108886719	-104.481842041016	-7.61479902267456	V1	12.2157294312521	8.93289518931714	0.823017062897123	1
54	LOp3	157484	lh	-19.894287109375	-53.8827133178711	0.16510184109211	V2	6.29934291912571	7.16076048426354	1	1
54	LOp4	36089	lh	-20.0978374481201	-49.4684791564941	-8.14456939697266		2.49782879906791	2.27613632634122	1	1
54	LOp5	35811	lh	-24.5516471862793	-47.8083343505859	-9.80695915222168		2.43181578015531	1.84438129512638	1	1
54	LPm10	35717	lh	-25.3975143432617	-48.8231430053711	-9.53130626678467		5.14333942081943	2.78953608989189	0.0327544561052807	1
54	LPm11	35816	lh	-21.7714900970459	-51.1409530639648	-11.945273399353		4.28510852029591	0.963820411016798	0.00420378046270982	1
54	LPm12	36006	lh	-17.8238563537598	-55.272590637207	-12.3338680267334		2.54635600577018	1.42582504016116	1	1
54	LPm8	36350	lh	-22.4828701019287	-47.4322128295898	-6.22165012359619		0.624559712392417	1.51050545064529	1	1
54	LPm9	36351	lh	-21.9551849365234	-48.1684417724609	-6.39898443222046		2.27948422576522	1.38026579080095	0.85296061646596	1
54	LPs10	164376	lh	-14.4045906066895	-106.265632629395	2.01106238365173	V2	0.860727056176715	-0.30505447921312	0.832714077743737	1
54	LPs6	166307	lh	-25.4402160644531	-85.2358322143555	23.3632507324219		2.06030165751425	1.2917702555909	0.689999827672371	1
54	LPs7	166304	lh	-26.9347820281982	-88.7685852050781	26.6192111968994		2.44096979268642	1.02792887246009	0.425167163253816	1
54	LPs8	164082	lh	-15.2446689605713	-95.0164642333984	2.99157309532166	V3	1.07119971437507	-0.249201311091937	0.0102091811237239	1
54	LPs9	163656	lh	-17.5705146789551	-93.4009094238281	3.14606666564941	V3	-0.143078100698771	0.183912147976092	1	1
54	LTp2	36768	lh	-16.6813793182373	-38.2845649719238	-10.9148826599121		-0.0304219660865303	0.383963071924813	1	1
54	LTp5	30032	lh	-31.8092060089111	-64.8326568603516	-19.5307083129883	high-level face-selective	2.23007266910217	0.914378561383373	0.287842190016103	1
54	LTp6	30000	lh	-34.6846694946289	-65.46435546875	-18.1905250549316	high-level face-selective	2.07493062102563	0.149657061139758	0.197377501725328	1
54	ROp1	173716	rh	5.7391562461853	-67.9534759521484	13.2326030731201	V1	6.50131541576091	8.08746215983311	1	1
54	ROp2	173170	rh	3.40024065971375	-65.6079711914063	2.66212868690491	V2	7.21806447222027	7.77549124255552	1	1
54	ROp3	173914	rh	1.15432262420654	-74.3446197509766	5.03138160705566	V1	10.7378442390648	15.5691570264048	1	0.771814092953523
54	ROp4	169695	rh	18.0199966430664	-64.1510696411133	-12.7060089111328	V3	6.40447203414194	5.54894259474338	0.368605171098661	1
54	ROp5	27553	rh	22.965503692627	-62.8042526245117	-11.6194467544556	V3	2.03537885337863	0.498355936120802	0.329688489088789	1
54	ROp6	169942	rh	25.1434116363525	-76.3084869384766	-6.18148136138916	V4	1.8445781829208	0.55414491365442	0.62616310892173	1
54	RPm10	169803	rh	26.4898414611816	-76.7260513305664	-5.60140609741211	V4	0.681709417127085	0.407850761826645	1	1
57	LGRD52	175079	lh	-55.2443618774414	-52.3616485595703	-7.55192375183105	high-level non face-selective	15.7511255548836	1.91462752085155	0.00420378046270982	1
57	LGRD59	175991	lh	-44.3652534484863	-70.0459136962891	4.0330696105957		1.63294260906845	-0.192682270015256	0.00420378046270982	1
57	LO1	167245	lh	-11.1769485473633	-92.9960632324219	24.4513988494873	V3	4.54312995534974	0.605685641137383	0.0102091811237239	1
57	LTo1	164666	lh	-17.7886543273926	-105.493728637695	-8.8051233291626	V1	5.54486857525038	0.025933377055116	0.258532498456654	1
57	LTo3	160890	lh	-33.5756454467773	-96.8253402709961	0.904204905033112	high-level non face-selective	1.10230165945783	-0.391424238533435	0.200993253373313	1
57	LTo4	174759	lh	-36.3511352539063	-81.9140930175781	-5.03794860839844		0.0425200244738781	-0.187041553757212	0.281773399014778	1
59	RO10	164935	rh	46.5098686218262	-73.8146438598633	2.86289954185486		2.0149335255841	0.742711169203382	0.156987080230377	1
59	RO2	176750	rh	9.08926868438721	-95.1684875488281	-1.56470239162445	V1	5.4039753719519	4.4472213208146	1	1
59	RO3	176313	rh	11.2337026596069	-94.0701675415039	0.844065308570862	V1	4.52443270873176	6.76448693265374	1	0.771814092953523
59	RO4	175838	rh	11.300708770752	-93.865478515625	-1.13859295845032	V1	2.1339534254488	1.38986655120105	1	1
59	RO5	163202	rh	27.7599182128906	-90.7289810180664	-0.0621970407664776		2.11691914758545	2.55256488879305	1	0.571714142928536
59	RO6	163421	rh	29.3543167114258	-91.5954284667969	3.81429553031921		4.66790463539363	0.675454528007801	0.00420378046270982	1
59	RO7	163497	rh	45.4128379821777	-75.3753890991211	-8.90414524078369	high-level non face-selective	2.96609063658163	0.291559033731159	0.00420378046270982	1
59	RO8	163712	rh	43.8047790527344	-74.7170333862305	-8.12514781951904	high-level non face-selective	1.67005228567589	1.09015836910143	1	1
59	RO9	162349	rh	48.3762321472168	-74.8304290771484	-15.0105676651001		2.53399687619977	0.331402496297437	0.00420378046270982	1
59	RTIp3	26164	rh	24.4735774993896	-47.140193939209	-11.0913991928101		2.17579648566909	0.15524478407641	0.00420378046270982	1
59	RTIp4	26683	rh	27.0096473693848	-50.8158645629883	-7.92079162597656		1.99549007300713	-0.0378094190154435	0.0102091811237239	1
59	RTIp5	27314	rh	29.5334415435791	-51.7555656433105	-8.38944435119629	VO	1.32304810818586	-0.0348244858168162	0.106546726636682	1
59	RTo7	118657	rh	28.1898937225342	-64.7637252807617	37.3217506408691		3.63791698325537	-0.218196209871181	0.00420378046270982	1
62	Lo1	150055	lh	-11.6712398529053	-91.2665176391602	-10.1901607513428	V2	2.71340002613994	1.87679620782461	1	1
62	Lo2	149910	lh	-11.410701751709	-87.0226593017578	-15.2893972396851	V3	3.52421936869217	3.34402380292885	1	1
62	Lo3	161495	lh	-23.0654640197754	-89.3787384033203	-18.1760311126709	V3	1.83770756463434	1.99998190571452	1	1
62	Lo4	160976	lh	-19.837833404541	-89.0418548583984	-13.4818773269653	V4	1.37756800505599	0.592603102144952	0.691904047976012	1
62	Lo5	160901	lh	-36.8868751525879	-88.1637878417969	4.23968124389648		1.39180313397386	0.227657226527016	0.857571214392804	1
62	Lo6	159959	lh	-43.4341506958008	-87.3169250488281	3.33862400054932		1.84785372628107	2.39601299134125	1	1
62	Lo7	176516	lh	-49.7326507568359	-81.5048522949219	1.33353006839752		2.67801183263202	1.38664707142429	0.953348068233924	1
62	Lo8	176594	lh	-50.1826210021973	-74.9310455322266	3.95089673995972		2.52681286430089	-0.0145783762108795	0.0212872287260625	1
