# Supplementary material for: Human intracranial recordings link suppressed transients rather than 'filling-in' to perceptual continuity across blinks
Source: eLife journal article supplement (doi:10.7554/elife.17243), 2016-09-29
Supplement: supp [file elife-17243-supp-v1.zip › elife_poa_e17243_Figure_7_source_data_1.xls]

## Sheet: overshoot parameter estimates
ROI	condition	ls_mean	ls_mean_minus_1_SE	ls_mean_plus_1_SE	n_patients	T_value_against_zero	p_value_against_zero_FDR_corrected	T_value_against_zero	p_value_against_zero_FDR_corrected
V1	gap_face	4.85582	3.95107	5.79474	8	4.10244	0.004559	4.10244	0.004559
V1	vol_blink_face	6.66352	5.59146	7.78048	6	3.88224	0.0116156	3.88224	0.0116156
V1	spon_blink_face	3.98656	3.11345	4.89265	8	2.57826	0.0365651	2.57826	0.0365651
V1	gap_non-face	5.37153	4.44801	6.32993	8	14.212	2.02833e-06	14.212	2.02833e-06
V1	vol_blink_non-face	7.76955	6.65303	8.93285	6	4.34197	0.00741509	4.34197	0.00741509
V1	spon_blink_non-face	5.87477	4.93294	6.85219	8	5.60557	0.000811212	5.60557	0.000811212
V2	gap_face	4.73233	3.68147	5.82982	7	3.97943	0.00728797	3.97943	0.00728797
V2	vol_blink_face	4.95869	3.86203	6.10574	6	2.79726	0.0381166	2.79726	0.0381166
V2	spon_blink_face	2.24236	1.2973	3.22937	7	3.05252	0.0224392	3.05252	0.0224392
V2	gap_non-face	4.51164	3.47015	5.59934	7	3.81068	0.00885654	3.81068	0.00885654
V2	vol_blink_non-face	4.75767	3.66985	5.89549	6	4.23433	0.00821409	4.23433	0.00821409
V2	spon_blink_non-face	2.66273	1.6998	3.66839	7	1.55947	0.169902	1.55947	0.169902
V3	gap_face	5.3691	4.39313	6.38411	8	2.43455	0.0451185	2.43455	0.0451185
V3	vol_blink_face	3.82942	2.79594	4.90975	5	3.23439	0.0318428	3.23439	0.0318428
V3	spon_blink_face	1.58506	0.754671	2.44868	8	3.02015	0.0193823	3.02015	0.0193823
V3	gap_non-face	4.20357	3.27244	5.17195	8	3.17398	0.0156209	3.17398	0.0156209
V3	vol_blink_non-face	2.71091	1.72594	3.74053	5	1.93959	0.124437	1.93959	0.124437
V3	spon_blink_non-face	0.922963	0.118042	1.76009	8	3.13796	0.016426	3.13796	0.016426
V4	gap_face	2.79468	1.55951	4.10062	6	1.54598	0.182775	1.54598	0.182775
V4	vol_blink_face	2.03941	0.771209	3.38504	5	2.89372	0.0443968	2.89372	0.0443968
V4	spon_blink_face	0.461097	-0.647624	1.63334	6	1.11001	0.317505	1.11001	0.317505
V4	gap_non-face	1.54904	0.381367	2.78361	6	2.42839	0.0594985	2.42839	0.0594985
V4	vol_blink_non-face	1.31628	0.0896872	2.61776	5	3.41205	0.0269766	3.41205	0.0269766
V4	spon_blink_non-face	0.0203991	-1.06444	1.16739	6	-1.16933	0.294977	-1.16933	0.294977
VO	gap_face	4.41748	3.17418	5.72748	6	1.96903	0.106056	1.96903	0.106056
VO	vol_blink_face	0.407362	-0.757264	1.64248	4	1.42867	0.24842	1.42867	0.24842
VO	spon_blink_face	0.286807	-0.746161	1.37519	6	1.08504	0.327427	1.08504	0.327427
VO	gap_non-face	3.50034	2.30374	4.76113	6	1.28293	0.255765	1.28293	0.255765
VO	vol_blink_non-face	0.3997	-0.76449	1.63435	4	0.483985	0.661529	0.483985	0.661529
VO	spon_blink_non-face	-0.30687	-1.30961	0.749665	6	-1.08085	0.329115	-1.08085	0.329115
high-level face-selective	gap_face	5.46643	4.58221	6.38246	10	3.22395	0.0104232	3.22395	0.0104232
high-level face-selective	vol_blink_face	1.43646	0.676647	2.22419	9	2.31014	0.0496782	2.31014	0.0496782
high-level face-selective	spon_blink_face	0.00214048	-0.692358	0.72162	10	0.165657	0.872088	0.165657	0.872088
high-level face-selective	gap_non-face	1.27683	0.53807	2.04216	10	1.93755	0.0846409	1.93755	0.0846409
high-level face-selective	vol_blink_non-face	0.105342	-0.607287	0.844157	9	0.47806	0.645398	0.47806	0.645398
high-level face-selective	spon_blink_non-face	0.196797	-0.50446	0.923278	10	0.607175	0.55874	0.607175	0.55874
high-level non face-selective	gap_face	4.2212	3.52968	4.93303	11	3.16287	0.0101094	3.16287	0.0101094
high-level non face-selective	vol_blink_face	0.390378	-0.260675	1.0629	8	2.12965	0.0707065	2.12965	0.0707065
high-level non face-selective	spon_blink_face	-0.0869985	-0.655515	0.498226	11	0.556111	0.590361	0.556111	0.590361
high-level non face-selective	gap_non-face	3.55797	2.88539	4.25032	11	3.08461	0.0115495	3.08461	0.0115495
high-level non face-selective	vol_blink_non-face	0.39381	-0.257352	1.06645	8	2.14412	0.0692125	2.14412	0.0692125
high-level non face-selective	spon_blink_non-face	0.182061	-0.394136	0.775193	11	1.84983	0.0940719	1.84983	0.0940719

## Sheet: overshoot simple effects
ROI	condition_1	condition_2	trial_category	simple_effect_FDR_corrected_pValue
V1	gap	spon_blink	face	0.517513
V1	gap	spon_blink	non-face	0.744641
V2	gap	spon_blink	face	0.0948212
V2	gap	spon_blink	non-face	0.214352
V3	gap	spon_blink	face	0.00185995
V3	gap	spon_blink	non-face	0.00592125
V4	gap	spon_blink	face	0.1952
V4	gap	spon_blink	non-face	0.374646
VO	gap	spon_blink	face	0.0114729
VO	gap	spon_blink	non-face	0.0162095
high-level face-selective	gap	spon_blink	face	4.29379e-08
high-level face-selective	gap	spon_blink	non-face	0.301908
high-level non face-selective	gap	spon_blink	face	4.29379e-08
high-level non face-selective	gap	spon_blink	non-face	1.25662e-05
V1	gap	vol_blink	face	0.214352
V1	gap	vol_blink	non-face	0.116437
V2	gap	vol_blink	face	0.917123
V2	gap	vol_blink	non-face	0.917123
V3	gap	vol_blink	face	0.30223
V3	gap	vol_blink	non-face	0.301908
V4	gap	vol_blink	face	0.744641
V4	gap	vol_blink	non-face	0.917123
VO	gap	vol_blink	face	0.0275895
VO	gap	vol_blink	non-face	0.0948212
high-level face-selective	gap	vol_blink	face	0.00018002
high-level face-selective	gap	vol_blink	non-face	0.26676
high-level non face-selective	gap	vol_blink	face	1.25662e-05
high-level non face-selective	gap	vol_blink	non-face	0.000261037
V1	spon_blink	vol_blink	face	0.0704734
V1	spon_blink	vol_blink	non-face	0.214352
V2	spon_blink	vol_blink	face	0.0785214
V2	spon_blink	vol_blink	non-face	0.187931
V3	spon_blink	vol_blink	face	0.11512
V3	spon_blink	vol_blink	non-face	0.1952
V4	spon_blink	vol_blink	face	0.386543
V4	spon_blink	vol_blink	non-face	0.484846
VO	spon_blink	vol_blink	face	0.929038
VO	spon_blink	vol_blink	non-face	0.736587
high-level face-selective	spon_blink	vol_blink	face	0.187931
high-level face-selective	spon_blink	vol_blink	non-face	0.929038
high-level non face-selective	spon_blink	vol_blink	face	0.629271
high-level non face-selective	spon_blink	vol_blink	non-face	0.866495

## Sheet: dip parameter estimates
ROI	condition	ls_mean	ls_mean_minus_1_SE	ls_mean_plus_1_SE	n_patients	T_value_against_zero	p_value_against_zero_FDR_corrected
V1	gap_face	2.94442	2.1114	3.80882	8	2.83273	0.0253068
V1	vol_blink_face	7.34022	6.29872	8.42297	6	3.11694	0.0263432
V1	spon_blink_face	5.22759	4.31169	6.17801	8	3.23765	0.0142995
V1	gap_non-face	3.38565	2.53661	4.26667	8	2.4506	0.0440684
V1	vol_blink_non-face	7.28578	6.24635	8.36638	6	2.9137	0.0332564
V1	spon_blink_non-face	4.90928	4.00492	5.8477	8	2.08376	0.0756638
V2	gap_face	3.00497	2.0748	3.97433	7	2.04759	0.0865297
V2	vol_blink_face	7.75533	6.61348	8.94618	6	3.40764	0.0190921
V2	spon_blink_face	4.87822	3.87231	5.92651	7	3.1705	0.0193064
V2	gap_non-face	2.50316	1.59328	3.45138	7	1.73772	0.132929
V2	vol_blink_non-face	7.43923	6.31038	8.61651	6	3.37183	0.0198501
V2	spon_blink_non-face	5.35047	4.32547	6.41866	7	2.79091	0.0315396
V3	gap_face	1.68154	0.864489	2.53059	8	2.66908	0.0320423
V3	vol_blink_face	4.89468	3.89761	5.93335	5	3.29645	0.0300331
V3	spon_blink_face	2.77663	1.91831	3.66856	8	3.44703	0.0107344
V3	gap_non-face	1.96316	1.1355	2.82324	8	1.61141	0.151125
V3	vol_blink_non-face	5.76617	4.73419	6.8412	5	3.0523	0.0379428
V3	spon_blink_non-face	3.36972	2.48905	4.28487	8	3.58132	0.00896039
V4	gap_face	1.55508	0.501752	2.66252	6	1.48455	0.197788
V4	vol_blink_face	3.85309	2.64619	5.12431	5	3.76372	0.0197112
V4	spon_blink_face	3.27826	2.14073	4.47424	6	2.87103	0.0349527
V4	gap_non-face	1.54207	0.489383	2.64885	6	1.44845	0.207158
V4	vol_blink_non-face	3.69413	2.49527	4.95688	5	1.9088	0.128924
V4	spon_blink_non-face	3.46734	2.32057	4.67304	6	1.8076	0.130475
VO	gap_face	1.29558	0.307668	2.33155	6	1.41631	0.215858
VO	vol_blink_face	2.0585	0.964132	3.21	4	1.41637	0.251645
VO	spon_blink_face	1.53117	0.532332	2.5786	6	2.1202	0.087483
VO	gap_non-face	0.907409	-0.0624948	1.9245	6	1.08452	0.327637
VO	vol_blink_non-face	2.50173	1.38537	3.67636	4	2.0307	0.135253
VO	spon_blink_non-face	1.30769	0.319219	2.34425	6	2.25193	0.0740974
high-level face-selective	gap_face	1.24023	0.490271	2.01763	10	2.10238	0.0648675
high-level face-selective	vol_blink_face	2.75083	1.93987	3.59178	9	3.27152	0.0113304
high-level face-selective	spon_blink_face	1.80284	1.03302	2.60083	10	3.41358	0.00770581
high-level face-selective	gap_non-face	0.643151	-0.0857206	1.3987	10	1.14644	0.281177
high-level face-selective	vol_blink_non-face	0.914623	0.16911	1.68769	9	1.71036	0.125567
high-level face-selective	spon_blink_non-face	0.720064	-0.0115236	1.47843	10	1.45206	0.180437
high-level non face-selective	gap_face	0.0485261	-0.577186	0.694396	11	2.22229	0.0504982
high-level non face-selective	vol_blink_face	1.49081	0.788666	2.21666	8	4.1218	0.00444952
high-level non face-selective	spon_blink_face	0.310617	-0.323275	0.96493	11	4.00737	0.00248859
high-level non face-selective	gap_non-face	0.248481	-0.383472	0.900792	11	1.60379	0.139842
high-level non face-selective	vol_blink_non-face	1.72342	1.01368	2.45714	8	3.29131	0.0132786
high-level non face-selective	spon_blink_non-face	-0.128109	-0.748309	0.51207	11	1.03071	0.326961

## Sheet: dip simple effects
ROI	condition_1	condition_2	trial_category	simple_effect_FDR_corrected_pValue
V1	gap	spon_blink	face	0.00334546
V1	gap	spon_blink	non-face	0.0478089
V2	gap	spon_blink	face	0.0411624
V2	gap	spon_blink	non-face	0.00189386
V3	gap	spon_blink	face	0.149037
V3	gap	spon_blink	non-face	0.0649208
V4	gap	spon_blink	face	0.124504
V4	gap	spon_blink	non-face	0.082634
VO	gap	spon_blink	face	0.825854
VO	gap	spon_blink	non-face	0.708096
high-level face-selective	gap	spon_blink	face	0.435667
high-level face-selective	gap	spon_blink	non-face	0.887808
high-level non face-selective	gap	spon_blink	face	0.662014
high-level non face-selective	gap	spon_blink	non-face	0.48699
V1	gap	vol_blink	face	2.9588e-07
V1	gap	vol_blink	non-face	5.69899e-06
V2	gap	vol_blink	face	8.2248e-07
V2	gap	vol_blink	non-face	2.9588e-07
V3	gap	vol_blink	face	0.000207466
V3	gap	vol_blink	non-face	1.26e-05
V4	gap	vol_blink	face	0.050802
V4	gap	vol_blink	non-face	0.0649208
VO	gap	vol_blink	face	0.546514
VO	gap	vol_blink	non-face	0.149037
high-level face-selective	gap	vol_blink	face	0.0262589
high-level face-selective	gap	vol_blink	non-face	0.708096
high-level non face-selective	gap	vol_blink	face	0.00911309
high-level non face-selective	gap	vol_blink	non-face	0.00911309
V1	spon_blink	vol_blink	face	0.021884
V1	spon_blink	vol_blink	non-face	0.00911309
V2	spon_blink	vol_blink	face	0.00588643
V2	spon_blink	vol_blink	non-face	0.0430415
V3	spon_blink	vol_blink	face	0.0193078
V3	spon_blink	vol_blink	non-face	0.00911309
V4	spon_blink	vol_blink	face	0.691238
V4	spon_blink	vol_blink	non-face	0.853162
VO	spon_blink	vol_blink	face	0.691238
VO	spon_blink	vol_blink	non-face	0.309601
high-level face-selective	spon_blink	vol_blink	face	0.163274
high-level face-selective	spon_blink	vol_blink	non-face	0.783244
high-level non face-selective	spon_blink	vol_blink	face	0.0354655
high-level non face-selective	spon_blink	vol_blink	non-face	0.000829911
