# Supplementary figures and images for: Human intracranial recordings link suppressed transients rather than 'filling-in' to perceptual continuity across blinks
Source: eLife journal article supplement (doi:10.7554/elife.17243), 2016-09-29

■ Gaps  
■ Voluntary blinks  
■ Spontaneous blinks

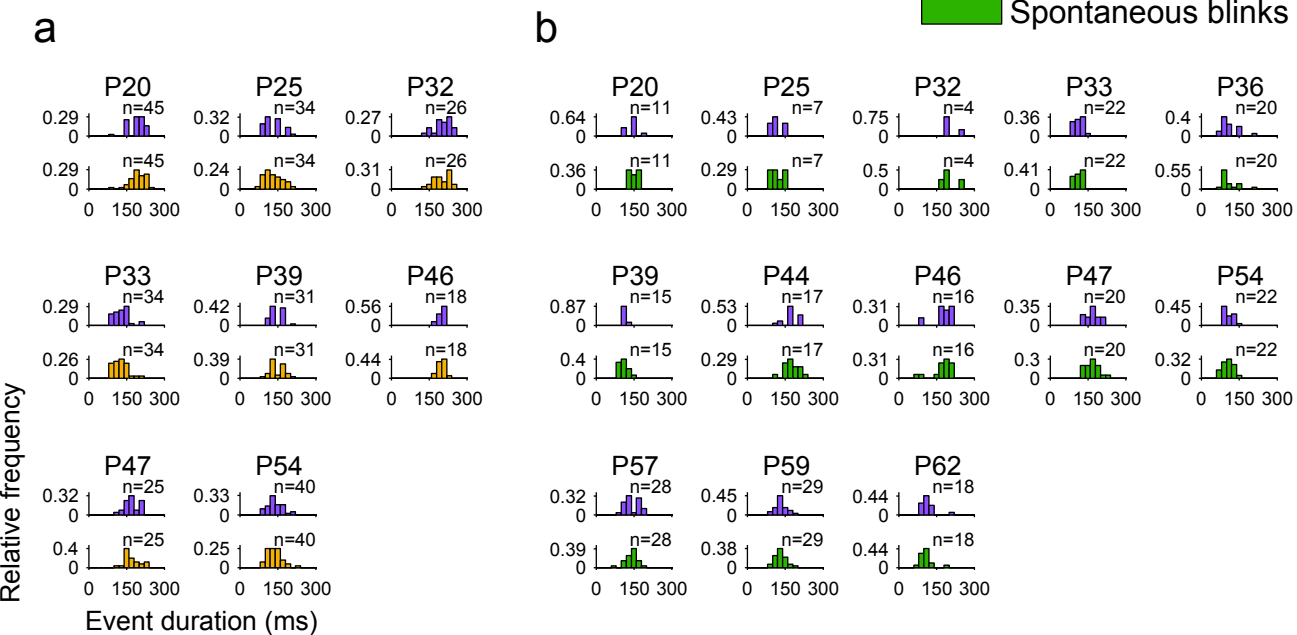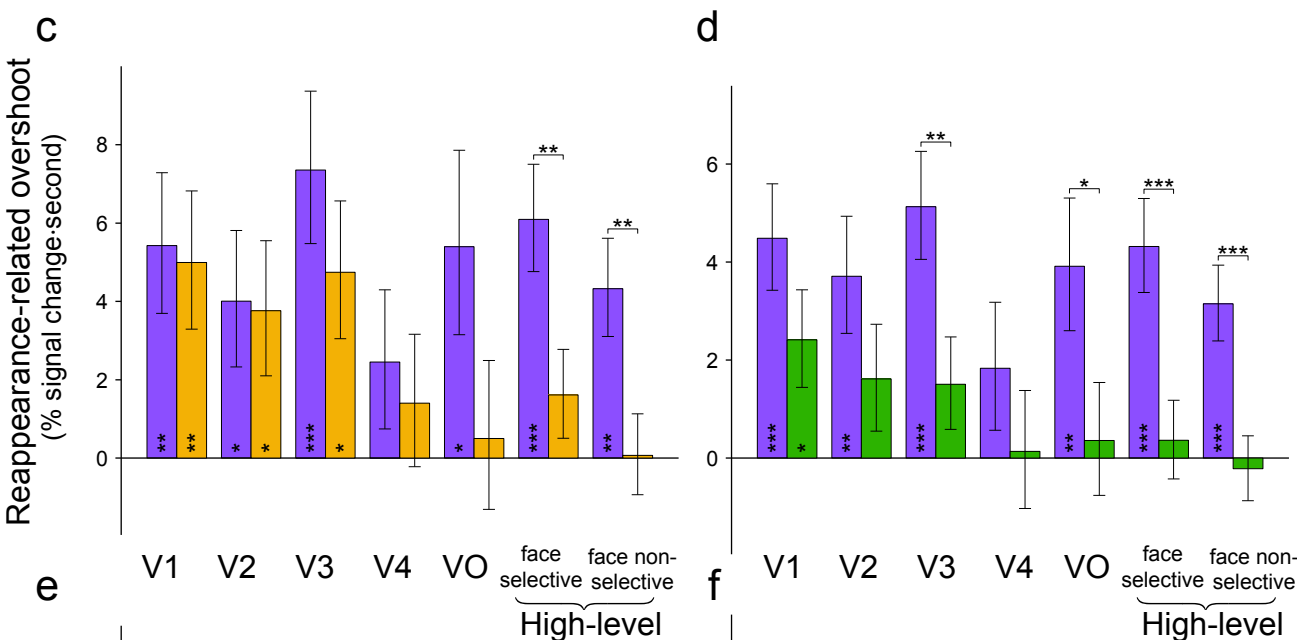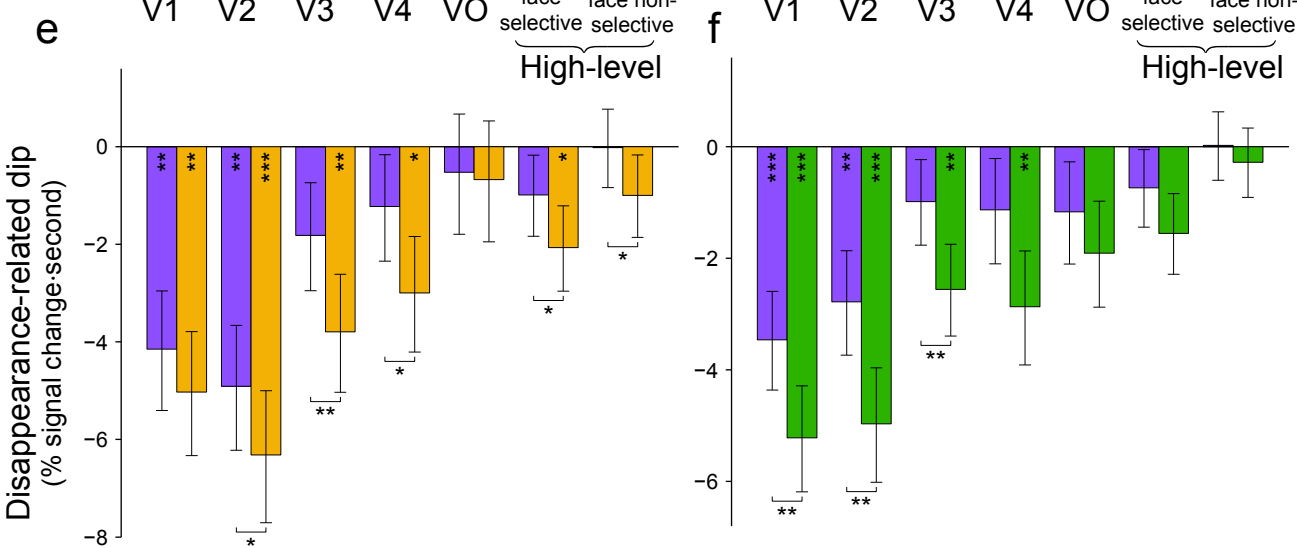

Supplement: supp [file elife-17243-supp-v1.zip]

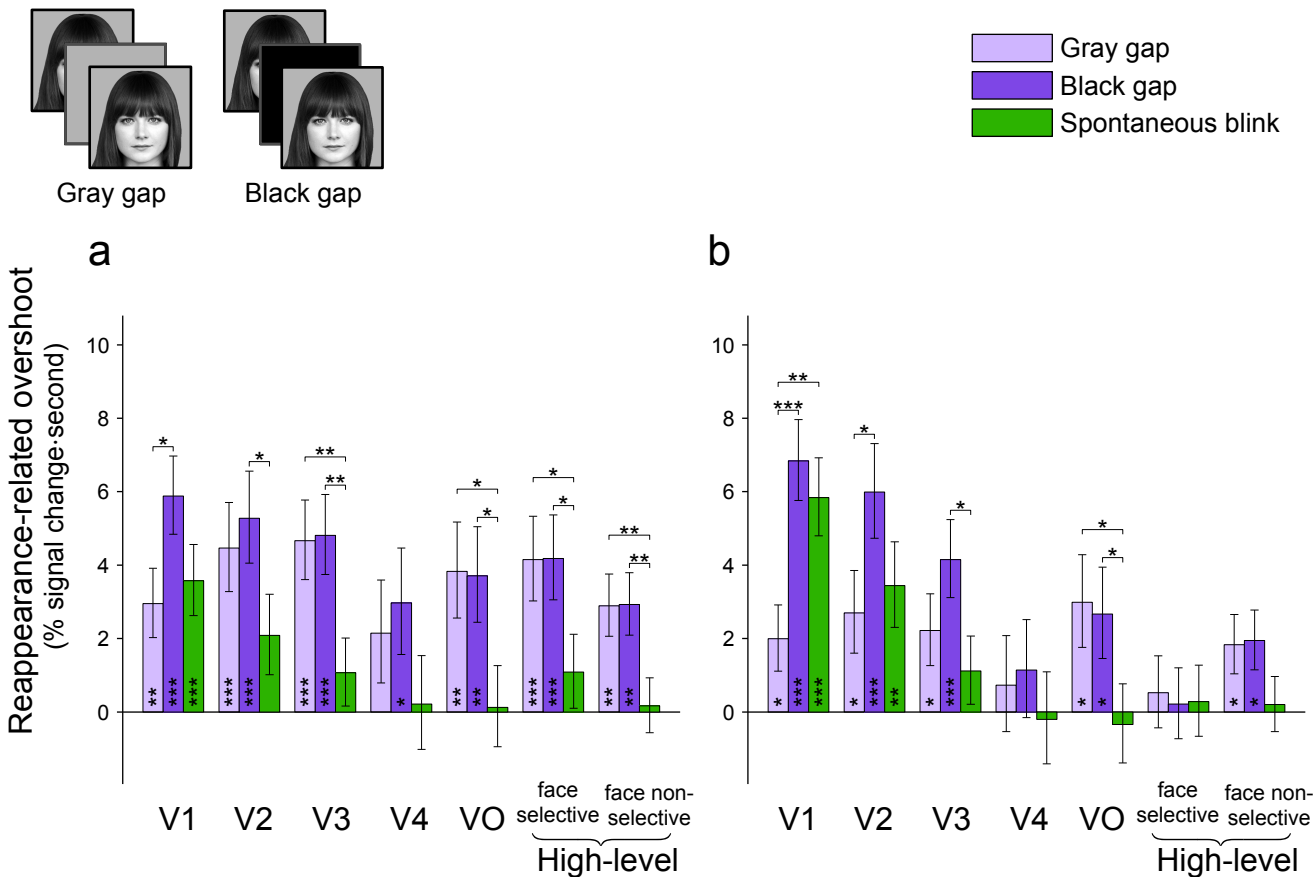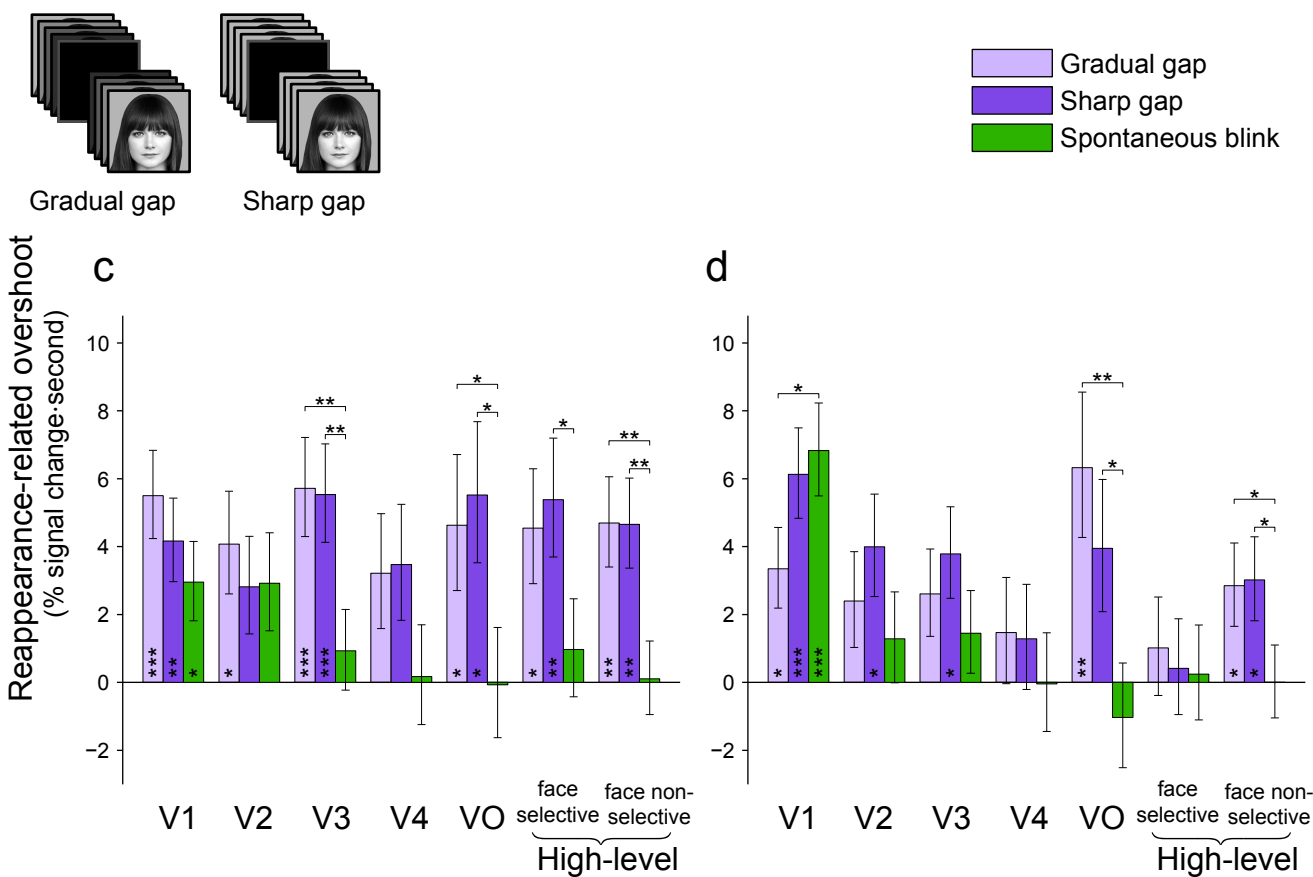

Supplement: supp [file elife-17243-supp-v1.zip]

Gaps  
 Voluntary blinks  
 Spontaneous blinks

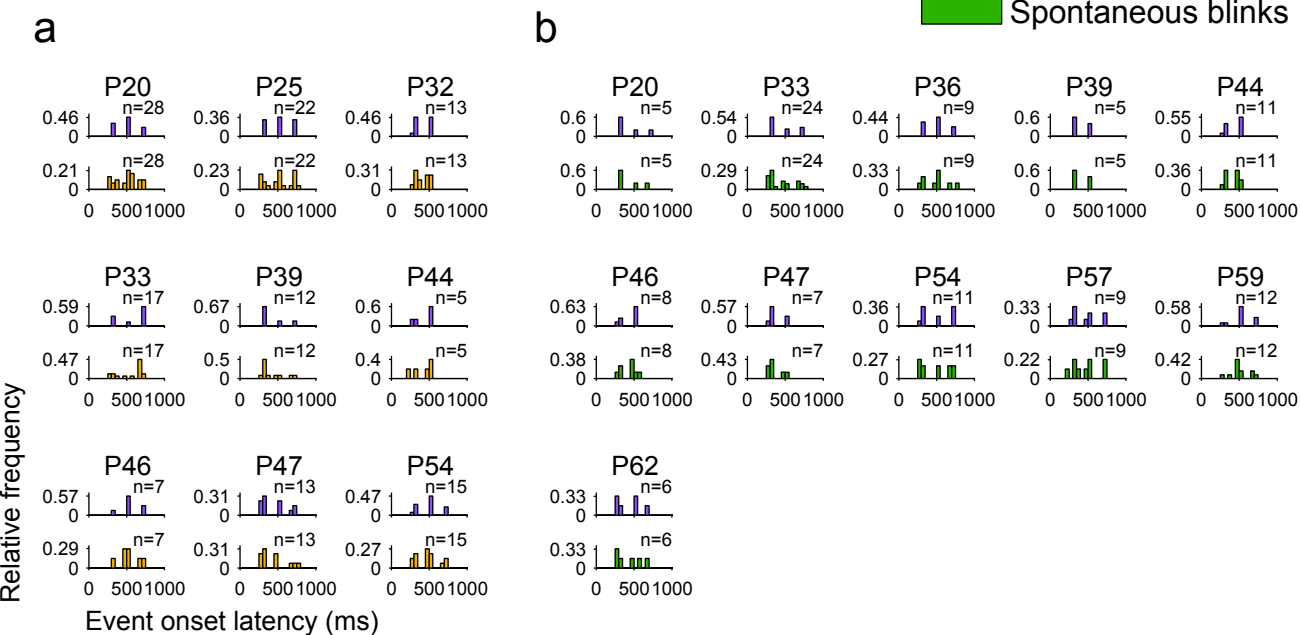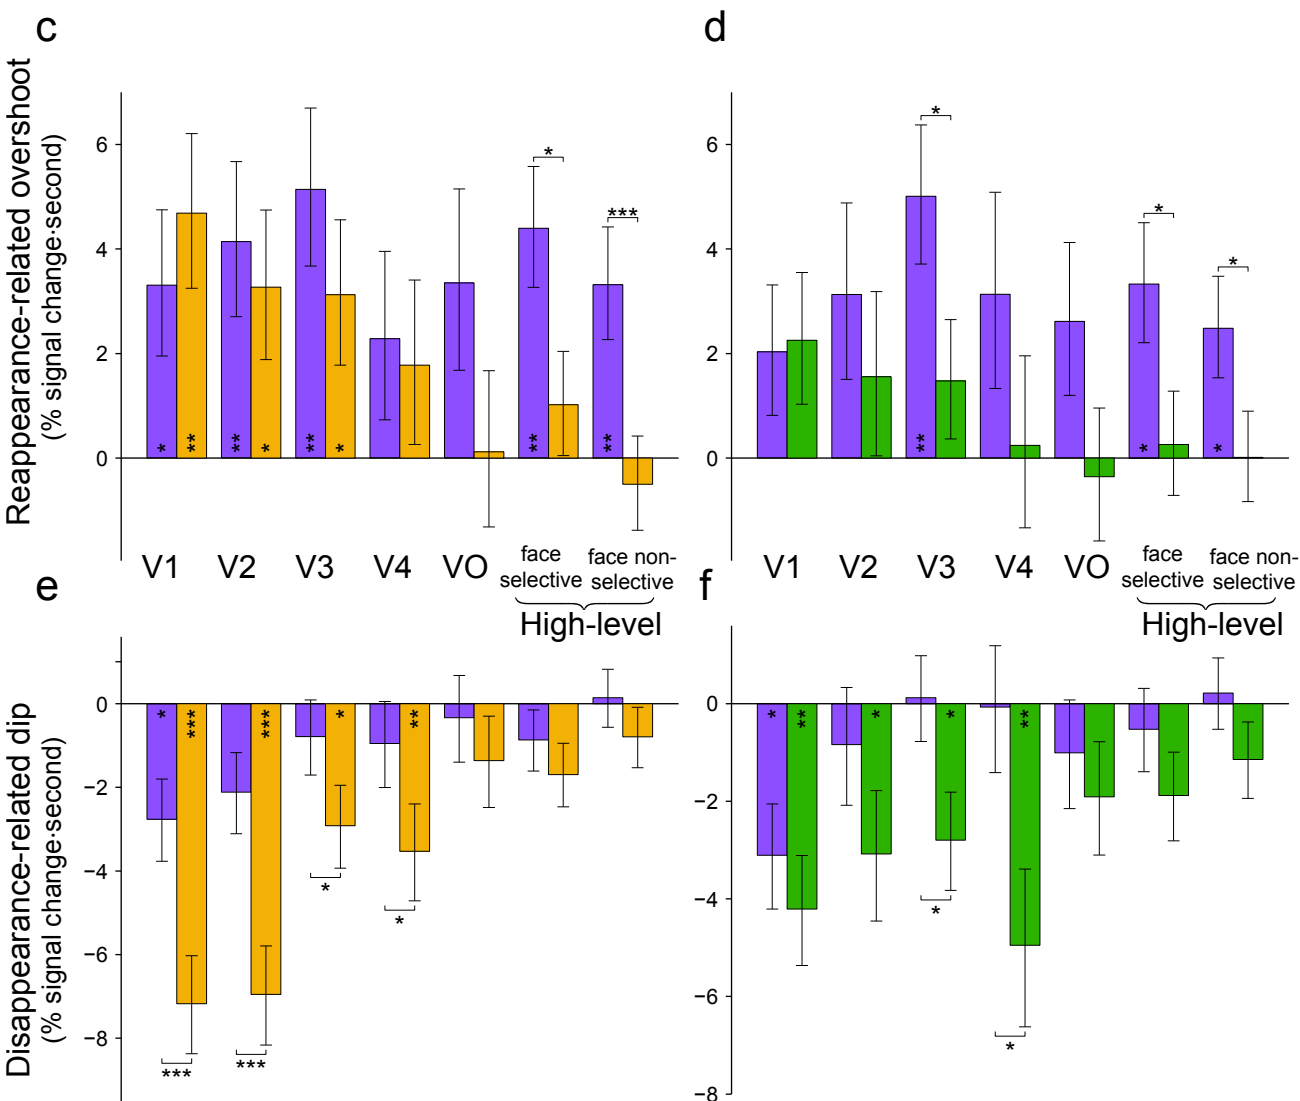

Supplement: supp [file elife-17243-supp-v1.zip › elife_poa_e17243_Figure_7_figure_supplement_1.pdf]

**a**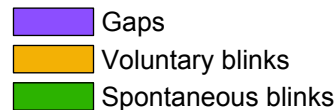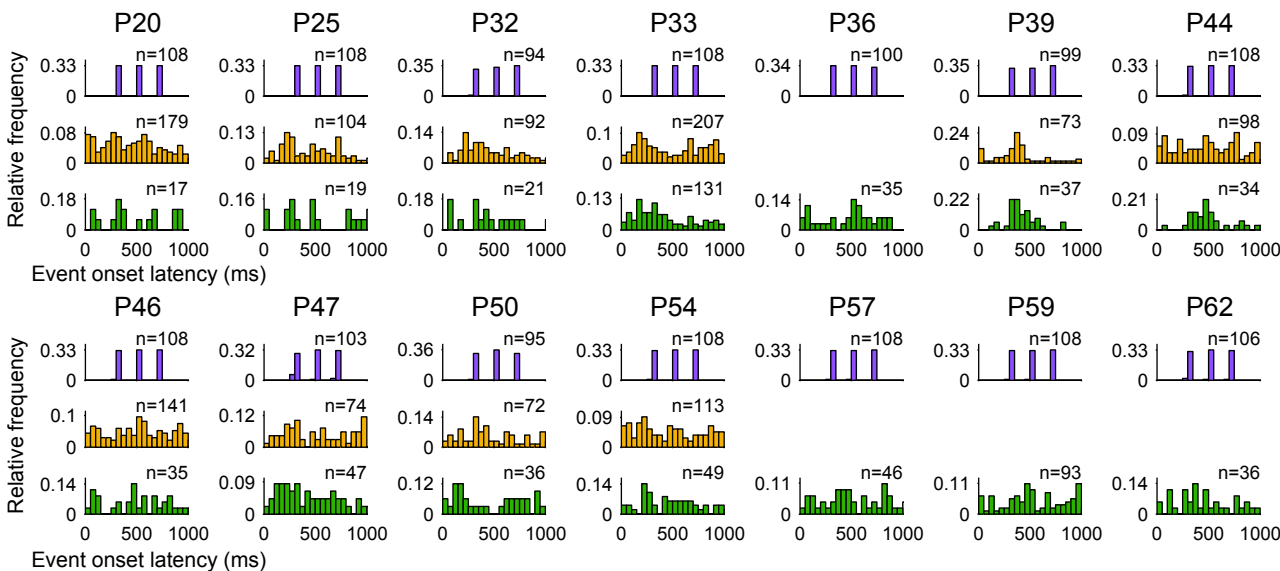**b**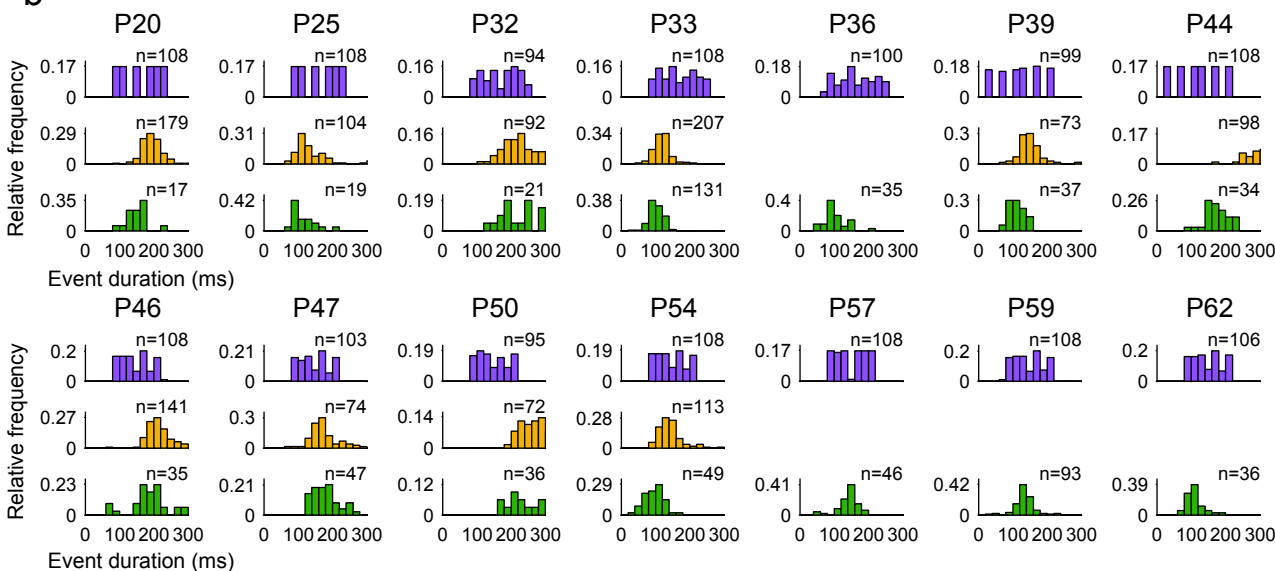

Supplement: supp [file elife-17243-supp-v1.zip › elife_poa_e17243_Figure_1_figure_supplement_1.pdf]

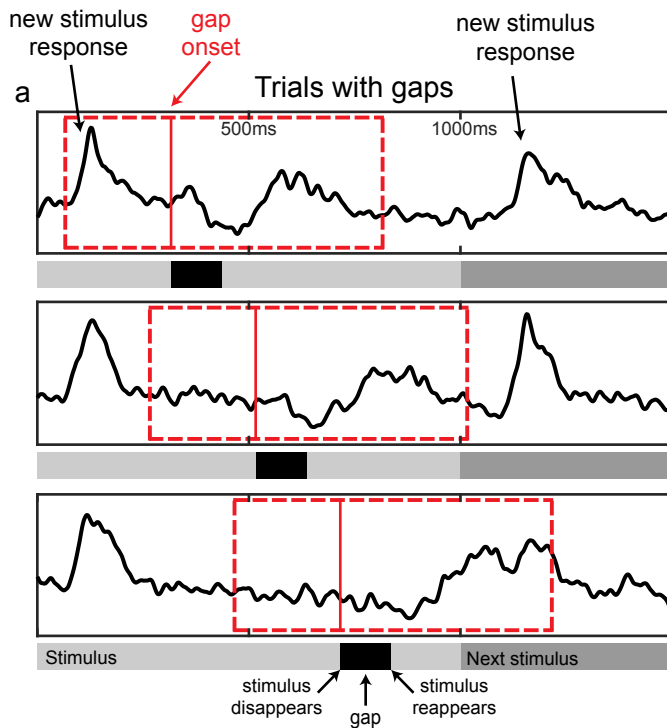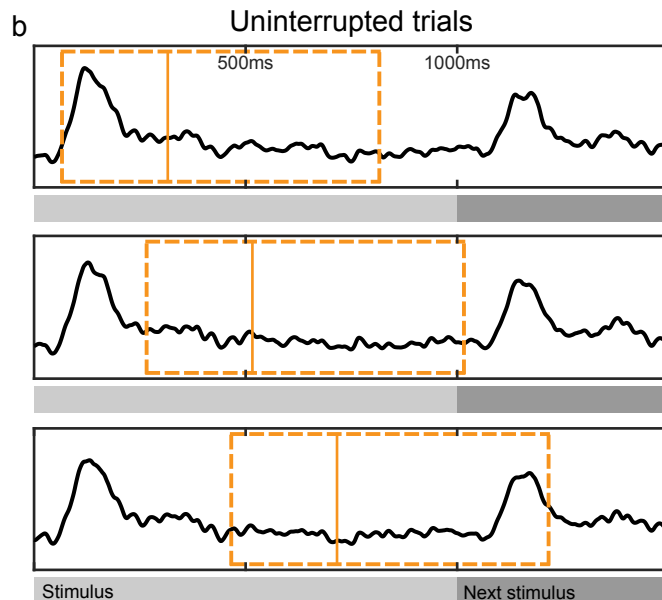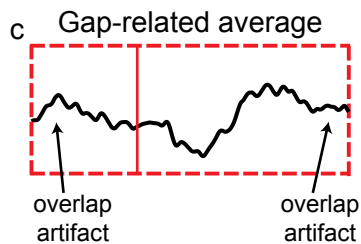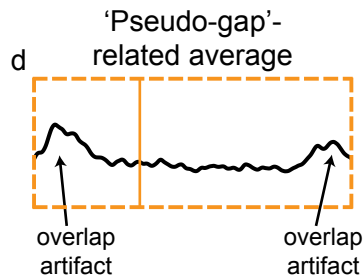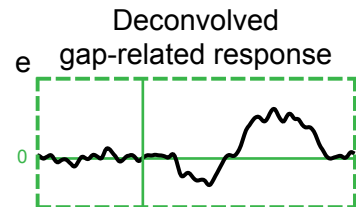

Supplement: supp [file elife-17243-supp-v1.zip › elife_poa_e17243_Figure_3_figure_supplement_1.pdf]

- Early sites
- High-order sites

P57

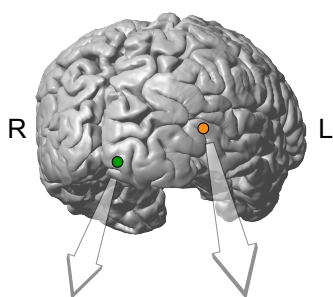

P20

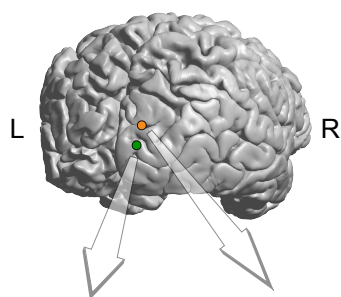

disappearance  
locked

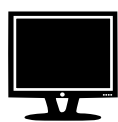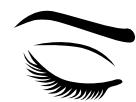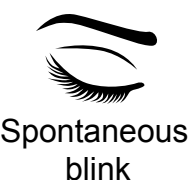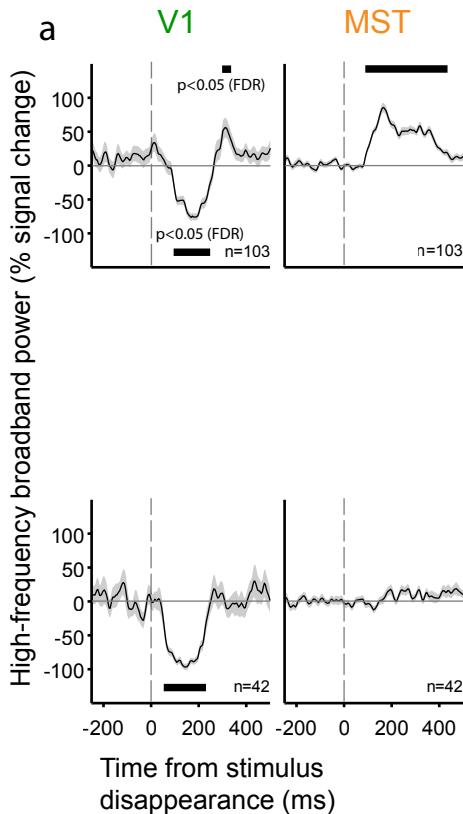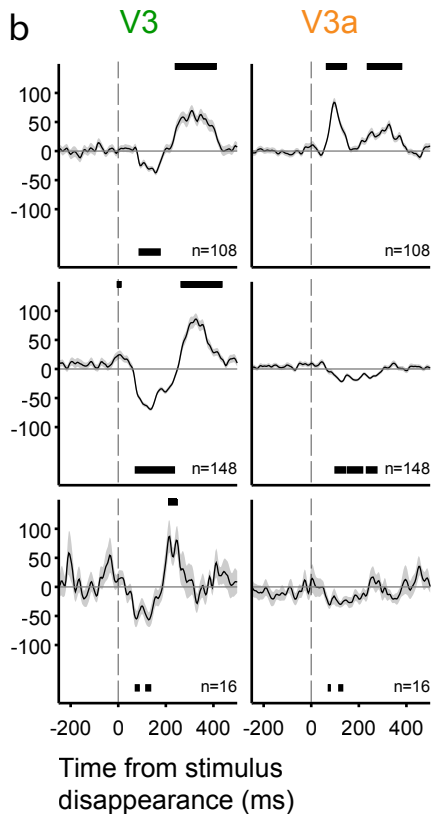

reappearance  
locked

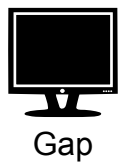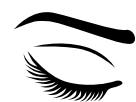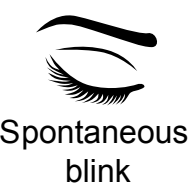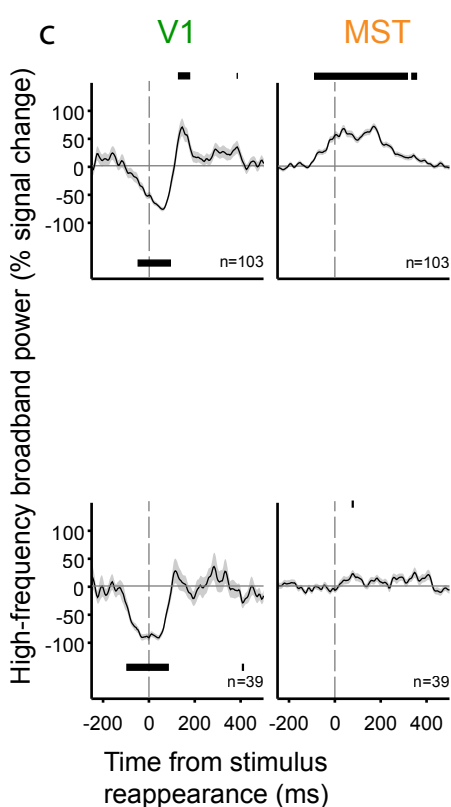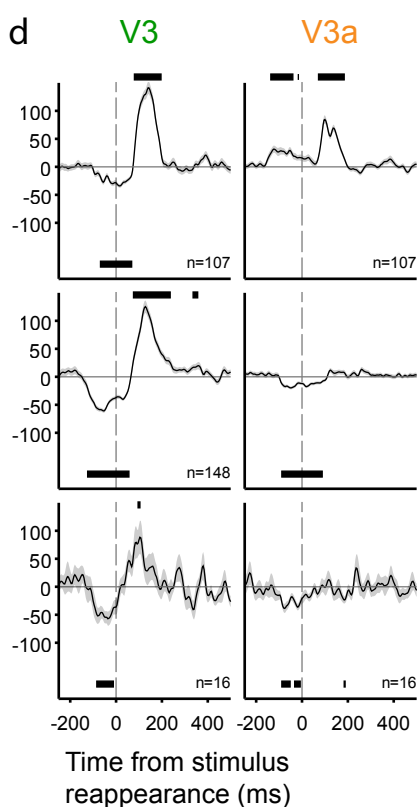

Supplement: supp [file elife-17243-supp-v1.zip]
